# Supplementary material for: Information Available to Parents Seeking Education about Infant Play, Milestones, and Development from Popular Sources
Source: MDPI journal article supplement (doi:10.3390/bs13050429), 2023-05-19
Supplement: s1 [file s1]

## SUPPLEMENTAL MATERIALS

### Table S2: Author Education/Experience Distribution

*The table shows the total number of multiple response selections (n=17 categories) for the Author Education/Experience data (n=137 total responses) including the count within each category and search type, the distribution of author education/experience types within each of the search types (i.e., Play, Milestone, and Development; “% within Search”), the distribution of author education/experience types across each of the search types (i.e., “% within Author Education/Experiences Responses”), and the standardized adjusted residuals (Z) from post-hoc analyses of the Fisher’s Exact test evaluating the null hypothesis that all author education/experience responses were similarly distributed among the Play, Milestone, and Development searches. Categories in italics had a total combined frequency among the three searches less than five so were not included in the statistical analyses. \* Plus bold font within the table denotes statistical significance below  $p < 0.0027$  after Bonferroni adjustments.*



|                       |                                                      | Author Education/Experience                                          |                              |                                                  |                                                             |                                                          |                                                      |                                           |                                                                          | Total   |
|-----------------------|------------------------------------------------------|----------------------------------------------------------------------|------------------------------|--------------------------------------------------|-------------------------------------------------------------|----------------------------------------------------------|------------------------------------------------------|-------------------------------------------|--------------------------------------------------------------------------|---------|
|                       |                                                      | <i>Healthcare,<br/>Parent,<br/>Early<br/>Childhood<br/>Education</i> | <i>Healthcare,<br/>Other</i> | <i>Parent, Early<br/>Childhood<br/>Education</i> | <i>Parent, Early<br/>Childhood<br/>Education,<br/>Other</i> | <i>Healthcare,<br/>Early<br/>Childhood<br/>Education</i> | <i>Early<br/>Childhood<br/>Education,<br/>Parent</i> | <i>Healthcare,<br/>Human<br/>Services</i> | <i>Parent, Early<br/>Childhood<br/>Education,<br/>Human<br/>Services</i> |         |
| Play Search           | Count                                                | 0                                                                    | 0                            | 2                                                | 2                                                           | 1                                                        | 1                                                    | 0                                         | 1                                                                        | 56      |
|                       | % within Search                                      | 0%                                                                   | 0%                           | 3.57%                                            | 3.57%                                                       | 1.79%                                                    | 1.79%                                                | 0%                                        | 1.79%                                                                    | 100.00% |
|                       | % within Author<br>Education/Experience<br>Responses | 0%                                                                   | 0%                           | 100.00%                                          | 100.00%                                                     | 50.00%                                                   | 100.00%                                              | 0%                                        | 100.00%                                                                  | 40.88%  |
|                       | Adjusted Residual                                    | --                                                                   | --                           | --                                               | --                                                          | --                                                       | --                                                   | --                                        | --                                                                       | N/A     |
| Milestones<br>Search  | Count                                                | 1                                                                    | 1                            | 0                                                | 0                                                           | 0                                                        | 0                                                    | 1                                         | 0                                                                        | 42      |
|                       | % within Search                                      | 2.38%                                                                | 2.38%                        | 0%                                               | 0%                                                          | 0%                                                       | 0%                                                   | 2.38%                                     | 0%                                                                       | 100.00% |
|                       | % within Author<br>Education/Experience<br>Responses | 33.33%                                                               | 50.00%                       | 0%                                               | 0%                                                          | 0%                                                       | 0%                                                   | 100.00%                                   | 0%                                                                       | 30.66%  |
|                       | Adjusted Residual                                    | --                                                                   | --                           | --                                               | --                                                          | --                                                       | --                                                   | --                                        | --                                                                       | N/A     |
| Development<br>Search | Count                                                | 2                                                                    | 1                            | 0                                                | 0                                                           | 1                                                        | 0                                                    | 0                                         | 0                                                                        | 39      |
|                       | % within Search                                      | 5.13%                                                                | 2.56%                        | 0%                                               | 0%                                                          | 2.56%                                                    | 0%                                                   | 0%                                        | 0%                                                                       | 100.00% |
|                       | % within Author<br>Education/Experience<br>Responses | 66.67%                                                               | 50.00%                       | 0%                                               | 0%                                                          | 50.00%                                                   | 0%                                                   | 0%                                        | 0%                                                                       | 28.47%  |
|                       | Adjusted Residual                                    | --                                                                   | --                           | --                                               | --                                                          | --                                                       | --                                                   | --                                        | --                                                                       | N/A     |
| Total                 | Count                                                | 3                                                                    | 2                            | 2                                                | 2                                                           | 2                                                        | 1                                                    | 1                                         | 1                                                                        | 137     |
|                       | % within Search                                      | 2.19%                                                                | 1.46%                        | 1.46%                                            | 1.46%                                                       | 1.46%                                                    | 0.73%                                                | 0.73%                                     | 0.73%                                                                    | 100.00% |

[illegible]
