# Supplementary material for: Information Available to Parents Seeking Education about Infant Play, Milestones, and Development from Popular Sources
Source: Behav Sci (Basel). 2023 May 19;13(5):429. doi: 10.3390/bs13050429 (PMC10215939; doi:10.3390/bs13050429)
Supplement: Supplementary file 1 [file behavsci-13-00429-s001.zip › Parent Ed Sources Supp Material S2 Data.xlsx]

## Sheet: Source Data
Source ID	Search	Source Type	Title	Citation	Year Published	Cost USD	Author Credentials	Author Credentials Present	Author Qualifications	Author Qualifications Provided	Author Education	Author Education Other	Play Info Presented	Milestone Info Presented	Toy Suggestions	Number_Play_Activities	Number_Milestones	Number_Toys	Dev Process Info provided	Dev. Process Info	Developmental Process Themes	Parent Role Info	Parent Role Info Provided	Parent Role Info Themes	Readiness to Play Instructions Provided	Readiness to Play Instructions	Readiness to Play Themes
1	Play	Book - Commercial Entity	Baby Play: 100 Fun-Filled Activities to Maximize your Baby's Potential	Baby Play: 100 Fun-Filled Activities to Maximize Your Baby's Potential. (2001). Wendy S. Masi & Roni Cohen Leiderman editors. Creative Publishing International, Inc. (In collaboration with Gymboree Corporation, Inc), San Francisco, CA.	2001	19.99	Dr.	1	developmental psychologisists (book jacket)	0	Human Services	developmental psychologisist	1	1	1	98	30	65	1	We firmly believe in the power of nurturing, positive relationships and.a playful approach to parenting. Our belief is reconfirmed daily by new scientific research demonstrating that brain development is strongly influenced by the kinds of early experiences our children receive. Your newborn's brain is only 25 percent developed, but bu the time your child is three, more than 90 percent of her bra…	Early Experiences, learn through play, learn through exploring objects,	Described large percent of development happens in the first year and how parents play can help; The interchanges you share will support your baby's physical, emotional, and cognitive development and - most important - will help establish a loving, joyful connection. You are your baby's first and most important teacher, treasured companion, and playmate; Dozens of studies in recent years have show…	1	opportunities for learning, parent bonding and PCI,	1	In the introduction to each age range, they talk about when to play and following baby's clues that they have had enough; Choose a time when your infant is alert and receptive.; Clues your baby is getting overstimulated include crying, turning or looking away, and closing his eyes or falling asleep; This book is divided into four age ranges. The labels provide a broad guide to help you find an ap…	Awake and Alert, this milestone then, overstimulated, babys lead,
2	Milestone	Web Site - Popular Press	Baby's Developmental Milestones for the First Year	https://www.today.com/parents/babys-developmental-milestones-first-year-I127191	2014	0		0		0			0	1	0		228		0			"During the first year of life your baby responds best to a warm, loving environment. Holding your baby and responding to her cries are essential in building a strong, healthy bond. Remember, you can't 'spoil' a baby."	1	parent bonding and PCI,	0
3	Play	Web Site - Professional Organization	How to Play with Babies	https://www.zerotothree.org/resources/1080-how-to-play-with-babies	2016	0		0		0			1	1	1	5	3	2	0		learn through play, responsive communication,	. At this age, play is not just about toys, it's about back-and-forth interactions - anything from singing a song to your baby as you change his diaper, to cooing and smiling back and forth with him."Loving and playful experiences like these help your baby learn."	1	parent bonding and PCI,	0	"As babies enter the second month of life, they become noticeably more interested in the world around them. While they don't 'play' in the way that we often think of - pushing trains around a track or feeding a baby doll - they are eager to explore the objects and interact with the people they see everyday. At this age, play is not just about toys, it's about back-and-forth interactions - anythin…
4	Play	Web Site - Professional Organization	Learning, Play, and Your 1- to 3-Month-Old	https://kidshealth.org/en/parents/learn13m.html	2022	0	MD	1	N/A	0	Health Care Education		1	1	1	9	8	4	0				0		0
5	Play	Web Site - Popular Press	The Best Ways to Play With Your Baby	https://www.parents.com/baby/development/the-best-ways-to-play-with-your-baby/	2018	0		0		0			1	1	1	11	7	22	0				0		0
6	Play	Web Site - Popular Press	10 Baby & Toddler Games to Play Right Now	https://www.citizen-times.com/story/life/family/2016/01/04/best-baby-toddler-games-play-right-now/77492656/	2016	0		0		1	Parent		1	1	1	18	2	6	1	"Playing games teaches children about serve-and-return, the essential concept behind social communication, and includes turn-taking, regulating (positive and negative) emotions, problem-solving, and understanding that people can have different thoughts."	Early Experiences, learn through play, responsive communication,	"Children are inquisitive, and will soak up information, so it's important to be deliberate in all we say, do and teach - this is the best age to help them understand that learning is fun."	0		1	"There are no hard and fast rules about when to play what - just follow your child's lead and interest in playing and let the games begin."	babys lead,
7	Play	Web Site - Individual	How to Entertain a Baby: Simple Ways to Play with Your Baby	https://sleepingshouldbeeasy.com/2017/02/16/how-to-entertain-a-baby/	2022	0		0		0			1	0	1	13		1	0				0		0
8	Play	Web Site - Professional Organization	Your baby’s development: communication and play	https://www.nct.org.uk/baby-toddler/games-and-play/your-babys-development-communication-and-play	N/A	0		0		0			1	1	1	15	5	2	0			Babies can learn a lot through play and all interaction between you both is valuable.	0		0
9	Play	Web Site - Professional Organization	Parent's Guide to Playing with Babies at 1 Month	https://www.youtube.com/watch?v=iVUoCYo3PIA	2017	0		0		1	Health Care Education		1	0	0	1			1	"They're not going to answer you, but learning that communication is a two-way street..."	responsive communication,	Talking to your baby and asking them questions, even if they are not going to respond.	1	Talking reading singing,	0
10	Play	Web Site - Individual	How to Play with Your Baby	https://www.youtube.com/watch?v=7ctyEK7bFC0	2013	0		0		1	Parent		1	1	1	2	6	4	0		Early Experiences,	"It's really important to play with your baby from birth. The baby will love to hear your voice and actually see your facial expressions. This is fabulous time for bonding, for attachment, and also early brain development and language development."	1	parent bonding and PCI,	1	"The key with regards to playing with your baby is not to do too much too soon. At first your baby will sleep a lot, but later on they'll start to be more alert..."	Awake and Alert, babys lead,
11	Play	Web Site - Individual	BABY PLAY-HOW TO PLAY WITH 0-3 MONTH OLD NEWBORN-BRAIN DEVELOPMENT ACTIVITIES	https://www.youtube.com/watch?v=kc7nN-r5y2I	2018	0		0		0			1	1	1	7	4	1	0			The woman explains that babies 0-3 months old perceive the world as a blurry picture of shapes and muted colors. It is important for you to connect with your baby even during this time.	1	parent bonding and PCI,	1	"Whenever you are playing with your child, make sure you are looking for sign that they are not overtired..."	overstimulated,
12	Play	Web Site - Individual	How to Play with Your New Born Baby	https://www.youtube.com/watch?v=hbyoMxc-igw	2012	0		0		0			1	0	1	4		1	0		learn through play,	The best thing parents can do is encourage and play with the baby to help his development.	1	opportunities for learning,	0
13	Play	Web Site - Individual	Top 10 ways to play with your Newborn	https://www.youtube.com/watch?v=2NhGInJlGvc	2010	0		0		1	Health Care Education, Parent		1	0	1	10		1	0				0		0
14	Play	Web Site - Commercial Entity	Playing With a Baby Through Development : How to Play With a 2-Month-Old Baby	https://www.youtube.com/watch?v=p5USCqJTpxs	2008	0	Ph.D.	1	D. Donna Williams is a licensed psychotherapist with a Ph.D. in early childhood education and development	1	Early Childhood Education		1	1	1	8	1	6	0				0		0
15	Play	Web Site - Individual	How to entertain your 6 month old baby	https://www.youtube.com/watch?v=mYFUAFJN1_E	2014	0		0	describes no childcare or expert experience	0			1	0	1	16		11	0				0		0
16	Play	Web Site - Commercial Entity	Playing With a Baby Through Development : How to Play With a 3-Month-Old Baby	https://www.youtube.com/watch?v=YhV4l35gYjk	2008	0	PhD	1	Dr. Donna Williams is a licensed psychotherapist with a Ph. D. in early childhood education and development.	1	Early Childhood Education		1	1	1	8	2	7	0				0		0
17	Play	Web Site - Commercial Entity	Playing With a Baby Through Development : How to Play With a 1-Month-Old Baby	https://www.youtube.com/watch?v=TqyqJouZi88	2008	0	Ph.D.	1	Dr. Donna Williams is a licensed psychotherapist with a Ph.D. in early childhood education and development.	1	Early Childhood Education		1	1	1	7	2	6	0			And you want to encourage to promote more awareness of what's in their environment.	1	opportunities for learning, safe envrionment,	1	One thing you want to make sure is, with little babies, at 1 month, 2 month, you want to make sure that you're not every stimulating, they will let you know. They'll start to maybe whine, or fuss, or move their body, so keep an eye on that	overstimulated,
18	Play	Web Site - Individual	Ways to play with your baby: 3-6 months	https://www.youtube.com/watch?v=0kxvsWbN7d4	2013	0		0		0			1	0	1	7		5	0				0		0
20	Play	Web Site - Popular Press	8 Games to Play with Your Baby	https://www.todaysparent.com/baby/how-to-play-with-your-baby/	2022	0		0		0			1	0	0	8			0		Early Experiences,	"Babies need a variety of experiences... and the key ingredient in their play is one-on-one attention from you."	1	parent bonding and PCI,	0
21	Play	Web Site - Professional Organization	20 fun, silly, development-boosting games to play with your baby	https://www.babycenter.com/0_20-fun-silly-development-boosting-games-to-play-with-your-ba_1479310.bc	2022	0	By Joyce Slaton | Medically reviewed by Paul Young, M.D., pediatrician	1	Pediatrician	1	Health Care Education		1	1	1	23	11	16	0				1	Rotating activities,	1	A few notes for the novice baby-entertainer: Repetition is important. Many games won't work the first time you play them. Your baby's attention span will vary a lot, depending on his age, his temperament, and his mood. Sometimes he'll enjoy a game for as long as 20 minutes, but more often you'll need to modify the game every five minutes or so. You'll know your baby's loving your antics when he's…	overstimulated,
22	Play	Web Site - Professional Organization	Playing with Newborns	https://raisingchildren.net.au/newborns/play-learning/play-ideas/playing-with-newborns	2022	0		0		0			1	0	1	7		3	1	When you play with your baby, your baby learns to trust and depend on you, and the bond between you and your baby gets stronger. This helps your newborn feel loved and secure. Play helps your baby's brain to develop and supports his overall development, learning, and wellbeing. This is because new play experiences help parts of your baby's brain link together and grow. And through play, your baby…	Early Experiences, learn through play,	Playing together helps you and your baby get to know each other. When you play with your baby, your baby learns to trust and depend on youm and the bond between you and your baby gets stronger. This helps your newborn feel loved and secure.	1	opportunities for learning, parent bonding and PCI, Talking reading singing,	1	Follow your baby’s cues. Even babies with a lot of energy need downtime and might feel overwhelmed if you keep trying to play with them when they’re tired. If your baby seems startled or upset, you can try playing a quieter game a bit later.	overstimulated, babys lead,
23	Play	Web Site - Professional Organization	Games to play with your baby (under 12 months)	https://www.babycentre.co.uk/a554804/games-to-play-with-your-baby-under-12-months	2017	0		0		0			1	0	0	12			1	Your baby will develop at an amazing rate in her first year. At times, she may seem to acquire new skills overnight.	learn through play, fast or slow,	The games below will help you encourage your baby to make the most of her new abilities as she discovers them. You should both have a lot of fun along the way.	0		0
24	Play	Web Site - Popular Press	Fun Games to Play with Babies (That They Can Figure Out)	https://www.fatherly.com/parenting/best-fun-game-to-play-with-babies/	2019	0		0		0			1	1	1	11	10	11	0		Early Experiences,	Positive experiences can do nothing but help	0		0
25	Play	Web Site - Individual	10 Ways to Play with Infants	https://teachingmama.org/10-ways-to-play-with-infants/	2015	0		0		0			1	1	0	13	1		0				0		0
26	Play	Web Site - Professional Organization	Games to Play With Your Baby	https://www.whattoexpect.com/playroom/playtime-tips/fun-with-baby.aspx	2021	0		0		0	Health Care Education		1	1	1	20	1	14	0			Yup — your goofy face can stimulate your baby's social, visual and emotional development — plus her listening skills.	1	opportunities for learning,	0
27	Play	Web Site - Commercial Entity	Playing with Your Baby	https://www.tinylove.com/us_en/articles/playing-with-your-baby	2019	0		0		0			1	1	1	1	3	2	1	Let your baby decide wen to be together with you and when to be on her own. Your baby needs to spend some time to learn on her own, freely, without your help. It allows her to learn aout herself, to learn to solve problems and develop her independence.	learn through play,	During the final months of her first year, and afterwards, you continue having a significant role in your baby's play. This role will sometimes be less active -- the role of companion, advisor, and supporter: a secure base for your child from which she can go out and explore while returning from time to time for encouragement and comfort when she fails or is afraid. During this period it is impor…	1	opportunities for learning, safe envrionment, free play,	1	Let your baby decide when to be together with you and when to be on her own. You've bought your baby a new toy and you decide to free up some quality time to spend with her; but will you know how to create a pleasant and supportive play environment? Will you know how to interest and stimulate your baby's curiosity? You can start by listening to your intuition and becoming familiar with your baby'…	babys lead,
28	Play	Web Site - Professional Organization	10 WAYS FOR NEW BABY AND TODDLER TO PLAY	http://www.candokiddo.com/news/sibling-play	2016	0	OT	1	Pediatric OT and parent	1	Health Care Education, Parent		1	0	1	10		4	0				0		0
29	Play	Web Site - Popular Press	Here's How to Play With Your Newborn and Why It Matters	https://theeverymom.com/heres-how-to-play-with-your-newborn-and-why-it-matters/	2018	0		0		0			1	0	1	4		2	1	"Even in their earliest days, babies are learning," Patillo exlains. "They learn about the world around them through multi-sensory play, and in doing so, they lay the groundwork for healthy physical, cognitive, and emotional development. Young babies are incredibly observant, watching their caregivers' faces, tracking objects with their eyes, and bringing toys to their mouths for exploration, for…	Early Experiences, learn through play, play using their senses, always learning, learn through exploring objects,	Child development, Patillo tells me, is all about building blocks- and not just of the Lego variety. The primary function of play at this stage is to lay a healthy foundation for skills your baby will learn later on. And all learning, she assures me, stems from a healthy and loving relationship with mom and dad. "Each time we engage our young child in play, we're strengthening our bond and buildi…	1	opportunities for learning, parent bonding and PCI,	0	Sure, it may seem mind-boggling, even downright laughable, to think that your wobbly-headed newborn needs playtime. But it turns out, play is every bit as essential as a diaper change.
30	Play	Web Site - Government/ Government Agency	Play with babies and toddlers	https://www.pregnancybirthbaby.org.au/play-with-babies-and-toddlers	2022	0		0		0			1	0	1	6		1	1	To grow and develop, children need time and attention from someone who's happy to play with them. Gradually, they'll learn to entertain themselves for some of the time.		Getting them involved in the things you do will teach them about taking turns to help and being independent. They'll also learn by copying what you do.	1	opportunities for learning, parent bonding and PCI,	0
31	Play	Web Site - Professional Organization	Playtime with your baby: Learning and growing in the first year	https://www.caringforkids.cps.ca/handouts/playtime_with_your_baby	2022	0		0		0			1	1	1	4	4	26	1	Play is how children learn-about themselves, other people, and the world around them. It helps to build confidence, relationships, and basic skills.	learn through play,	As a parent, you are your baby's first playmate. Play is a fun way for the two of you to bond and it encourages healthy child development.	1	parent bonding and PCI,	0
32	Play	Web Site - Professional Organization	6 Tips On How To Play With Your Baby Or Toddler	https://www.playgroupnsw.org.au/ParentResources/EarlyChildhoodDevelopment/Tips-On-How-To-Play-With-Your-Baby-or-toddler	2015	0		0		0			1	0	1	3		3	1				0		0
33	Play	Web Site - Professional Organization	Incorporating Play in Daily Routines	https://www.babyhearing.org/language-learning/incorporating-play-in-daily-routines	2019	0		0		0			1	1	1	10	1	3	0			Remember, you have many roles: you are the tour guide, the interpreter, and the play partner.	1	parent bonding and PCI,	0
34	Play	Web Site - Professional Organization	Baby and toddler play ideas	https://www.nhs.uk/conditions/pregnancy-and-baby/play-ideas-and-reading/	2022	0		0		0			1	0	1	3		9	0				0		0
35	Play	Web Site - Professional Organization	Playing with Your Baby	https://www.familyeducation.com/life/activities-babies/playing-your-baby	N/A	0		0		0			1	0	1	11		2	0				0		1	Describe once baby can be sitting, try swinging	this milestone then,
36	Play	Web Site - Popular Press	Newborn play - the skills you need to make it fun for you both	https://www.motherandbaby.co.uk/baby-and-toddler/baby/looking-after-your-baby/newborn-play-the-skills-you-need-to-make-it-fun-for-you-both	N/A	0		0		0			1	0	1	13		3	0		learn through play,	‘Playtime is vital for bonding, the development of your baby’s motor skills and her hand-eye co-ordination,’ says baby expert Luiza DeSouza. But while you may have a hamper full of tactile new toys at the ready, how do you use them effectively to entertain your newborn? ‘There are three key skills you need to engage with your baby: patience, openness and attentiveness,’ explains Luiza. ‘Use these…	1	opportunities for learning, parent bonding and PCI,	0
37	Play	Web Site - Commercial Entity	How to Play with Your Newborn Cute (and Easy) Baby Games	https://www.highlights.com/parents/articles/how-play-your-newborn	2016	0		0	Nancy Josephson Liff is senior contributing editor for Parenting at Highlights for Children. She has three children.	1	Parent, Other	senior contributing editor for Parenting at Highlights for Children.	1	1	1	6	2	7	1	"In the first few months of life, your little will one will learn about his world mainly through his contact with you. Get up close and personal. Encourage him to focus on you and other family members. He is just beginning to make out shapes and distinguish black-and-white contrast.""As she gets closer to the three- to four-month-old mark, she will begin to develop more control over her body, and…		"In the first few months of life, your little will one will learn about his world mainly through his contact with you. Get up close and personal. Encourage him to focus on you and other family members. He is just beginning to make out shapes and distinguish black-and-white contrast.""As she gets closer to the three- to four-month-old mark, she will begin to develop more control over her body, and…	1	opportunities for learning,	1	Babies love to play, but not when they’re hungry, cranky, tired, or fussy. Schedule play for times when your little one is settled, attentive, responsive, and seems interested in activity. As she gets closer to the three- to four-month-old mark, she will begin to develop more control over her body, and the two of you will be able to do more together.	Awake and Alert, overstimulated,
38	Play	Web Site - Professional Organization	Fun Activities for Your 9-Month-Old Baby	https://www.lucieslist.com/9-month-old-baby-activities-that-are-fun-and-boost-development/	2022	0		0		0			1	1	1	4	4	5	1	your baby is developing new skills every day, and communicating with him is finally becoming more of a two-way street. He’s experimenting with different emotional expressions, developing a sense of humor (have you noticed your baby reach out to give you something, only to yank it away when you try to grab it?), and may even be helping you put on his clothes (or fighting you on it—either way!). Se…	learn through play, responsive communication,	Your baby’s brain is ripe for sensory stimulation at this age, and as his favorite playmate, you have the awesome opportunity to teach him fun new games that will also help him learn. Double win!	1	opportunities for learning,	0
39	Play	App - Professional Organization	Baby Activities: Ways to Play With Your 10-12 Month Old That Boost Development	https://www.playfullyapp.com/2017/11/04/baby-activities-ways-to-play-with-your-10-12-month-old-that-boost-development/	2017	0		0		0			1	1	1	3	4	3	1	"Is it beginning to feel like time is speeding up all of a sudden? Sure, those first few months might have felt like they were crawling along at the pace of a lethargic sloth, but as your baby approaches his first birthday, you may start to experience the opposite effect."..."Not sure what to expect? Here are some common milestones to look for between 10-12 months..."	fast or slow,	"He feels most confident exploring when you’re nearby - you, as his primary caregiver, are known as the "secure base" he can head back to if he feels distressed. Over these few months, you’ll also likely notice your house becoming significantly messier as your baby explores everything in any drawer he can reach. You can give him a safe place to do so - a drawer all for himself filled with his toy…	1	opportunities for learning, parent bonding and PCI, safe envrionment,	0
40	Play	Web Site - Commercial Entity	19 DIY Sensory Play Ideas for Baby	https://redtri.com/ideas-for-sensory-play-with-baby/slide/1	2019	0	no credentials- Mom. However to link to bio is provided	0	Gabby Cullen arrived in Dallas by way of Northern California in 2013. After a full-time career in Media Relations, she now works from home as a freelance editor and writer. She's the proud mama of a pixie princess (October 2009) and a lil' man (November 2013). Her love of hustle and bustle gets the family out exploring as often as possible— it's been a pleasure to discover all Big D has to offer.…	1	Parent, Other	Media Relations	1	0	1	19		20	0				0		0
41	Play	Web Site - Individual	HOW TO PLAY WITH A 2 MONTH OLD	https://theeducatorsspinonit.com/how-to-play-with-2-month-old/	2019	0	Early Childhood Teacher	1	Early childhood teacher, author, speaker and mom of 3. Kim shares ways to make learning fun and parenting an adventure by sharing developmentally appropriate activities.	1	Early Childhood Education, Parent	Author/Speaker	1	1	1	4	1	5	0				1	Rotating activities,	1	It is important to know the signs of your baby. Too much stimulation is not a good thing either. I try to watch for signs that he is interested; cooing, smiling, alert eyes and to watch for disinterest fussing, turning away or wrinkling his brow (he does do this and I think it is the cutest ever, but it is his sign for getting frustrated and I know we need to stop or change activities or he will …	Awake and Alert, overstimulated,
42	Play	Web Site - Professional Organization	Your Child and Play From Birth to 3 Years	https://www.healthlinkbc.ca/healthlinkbc-files/play-birth-3-years	2019	0		0		0			1	0	1	6		6	1	Play is a very important part of healthy development. Through play and curiosity, your child develops language skills, social skills such as cooperation and sharing, and physical and thinking skills such as how to do things or how things work.	learn through play,	As a parent, you are the first to play with your baby. Playing with your baby helps you build a strong attachment that will give your child a safe place from which to explore the world as they grow. Responding to and playing with your baby in a caring and nurturing way will support all aspects of their healthy development.	1	parent bonding and PCI,	1	By being attentive to your baby, you will learn the cues they give to tell you what they need and how they are feeling. These cues will also help you know when your baby is ready for interaction and play and when they need to take a break from being stimulated. The principle of “serve and return” is an important idea that can guide your interactions with your child, during play time or at other t…	overstimulated, babys lead,
43	Play	Web Site - Individual	How to Keep a Baby Entertained	https://www.wikihow.com/Keep-a-Baby-Entertained	2022	0	She received her M.D. from the Medical College of Wisconsin School of Medicine in 1995.	1	Dr. Marusinec is a Board Certified Pediatrician in Wisconsin.	1	Health Care Education		1	0	1	11		13	0				0		0
44	Play	Web Site - Professional Organization	How To Play With A Newborn in 10 Simple Steps	https://www.mamanatural.com/how-to-play-with-newborn/	2019	0		1	Along with Certified Nurse Midwife Maura Winkler (CNM, CD, IBCLC), Genevieve created The Mama Natural Birth Course, the #1 bestselling childbirth education course online. In 2020, Genevieve partnered with Dr. Elisa Song to launch the Mama Natural Baby Care Course. A graduate of the University of Colorado, Genevieve is a prominent YouTuber with over 90,000,000 video views. A mother of three, Genev…	1	Health Care Education, Parent		1	0	1	10		1	1	Your newborn will eventually begin to pick up on changes in tone and inflection that will teach him about language and reading on his own as well as the fact that different sounds and tones are used to convey certain emotions and feelings		Whether you’re musically gifted or not, singing to your baby not only helps him learn the sound of your voice, but it also helps him learn to communicate....A 2014 study suggests that dancing with your baby is one of the best activities for newborns, since it may actually help you raise a kinder and more compassionate child...Despite the simplicity, these activities for newborns will stimulate hi…	1	parent bonding and PCI, Talking reading singing,	0
45	Play	Web Site - Commercial Entity	WHEN TO START SENSORY PLAY WITH YOUR BABY: A HELPFUL GUIDE	https://infantino.com/blogs/the-baby-monitor/when-to-start-sensory-play-with-your-baby-a-helpful-guide	2018	0		0		0			1	0	1	2		2	0	Even though we may not recognize it at first, these are our baby’s first steps toward sensory development.		With this in mind, it is important to remember that sensory play comes naturally for little ones, and all they need is your support and encouragement in order to reap the many benefits of sensory play!	1	opportunities for learning,	0
46	Play	Web Site - Professional Organization	Activities for Baby	https://www.guavafamily.com/blogs/guava/infant-games	2019	0		0		0			1	1	1	28	19	5	0			During their first few months you’ll really want to focus on encouraging baby to learn and embrace their curiosity. Introducing them to new places, faces, colors, and textures will be your main focus during these first months. Baby will still be working hard to develop their motor and cognitive skills - so we’ll start to introduce more educational and physical games a little later. For now, you’l…	1	opportunities for learning,	0
47	Play	Web Site - Professional Organization	6 Smart Ways to Stimulate Baby's Mind	https://www.thebump.com/a/smart-ways-to-play-with-baby	2019	0		0		0			1	0	1	6		3	0				0		0
48	Play	Web Site - Individual	HOW TO PLAY WITH YOUR NEWBORN BABY (0-3 MONTHS)	http://mamaot.com/how-to-play-with-your-newborn-baby-0-to-3-months/	2016	0	OT	1	OT and Mom to 2 kiddos	1	Health Care Education, Parent		1	1	1	10	7	9	0				0		0
49	Play	Web Site - Professional Organization	Playing With Baby	https://www.askdrsears.com/topics/parenting/child-rearing-and-development/bright-starts-babys-development-through-interactive-play/playtime-articles/floor-time-two	2019	0	Dr. Sears website gives info about contributors, but no speciic author	0		0			1	1	0	12	4		0			Floor Playing With Baby Brings You Closer Playing together on the floor is a great opportunity to strengthen the bond you have with your baby: It Does Good Things for Baby If you are blessed with an “easy” baby, how tempting it is to leave baby on the floor with his toys for hours on end while you “finally get things done around the house.” But the time you spend playing with baby is so valuable …	1	parent bonding and PCI,	0
50	Play	Web Site - Individual	Baby Play	https://www.magdagerber.org/blog/baby-play	2013	0		1	"I am a great-grandparent, but I remember clearly how I felt as a young mother of two small daughters -- confused, uncertain, and at times, overwhelmed."; world-renowned child therapist and infant specialist	1	Parent, Human Services	Child therapist and infant specialist	1	1	1	2	1	7	0				0		0
51	Play	Web Site - Individual	Infant Activities	https://thestay-at-home-momsurvivalguide.com/infant-activities/	N/A	0		0	stay at home mom, describes her family in "about me" page	1	Parent		1	1	1	41	2	14	0				0		0
52	Play	Book - Individual	Baby Play for Every Day: 365 Activities for the First Year	https://www.amazon.com/Baby-Play-Every-Day-Activities/dp/1465429697/ref=sr_1_1?keywords=Baby+Play+for+Every+Day%3A+365+Activities+for+the+First+Year&qid=1570812732&sr=8-1	2014	26.79		1	The author is a writer and editor, and a mother	1	Parent, Human Services	clinical psychologist, writer/editor	1	1	1	259	97	114	1	Play and playfulness form the basis of your baby's development during the first month of her life. Play is important because your baby has arrived primed to learn. her brain is developing at faster rate she'll ever expereince and it's through play that she'll soak up most of the information she needs to make sense of her world.	Early Experiences, learn through play, fast or slow,	When you play with your baby you offer her opprotunities to explore, experiment, and experience. As you play together you are fueling her senses and providing essential stimulation for her brain devleopment. Over the coming year, as your play activities together changeand evolve, you will be rewarded by advances in your baby's speech and language, her knowledge of the world around her and her awa…	1	opportunities for learning,	1	Babies develop at different rates, so you must be guided by what your baby enjoys. if your baby's skills are not developed enough for a particular activity, you should wait until they reach the appropriate development stage.	this milestone then, babys lead,
53	Play	Web Site - Professional Organization	Eat, Sleep, Play! When Do Babies Play With Toys?	https://momlovesbest.com/when-do-babies-play-with-toys	2022	0		0	Medically Reviewed by: Dr. Gina Jansheski is a board-certified pediatrician with over 20 years of experience treating infants and children of all ages in many different settings. Dr. Jansheski is the mother to three sons, has sponsored a young girl in India for the past 7 years and has also devoted her time to a new charity that she founded, Helping Hands M.D. feeding street animals in Thailand a…	0	Health Care Education, Parent		1	1	1	8	9	11	0				0		0
54	Play	Web Site - Professional Organization	Good Toys for Young Children by Age and Stage	https://www.naeyc.org/resources/topics/play/toys	N/A	0		0		0			0	1	1		22	41	0				0		0
55	Play	Web Site - Government/ Government Agency	Baby play: birth to 18 months	https://healthywa.wa.gov.au/Articles/A_E/baby-play-birth-to-18-months	2019	0		0		0			1	1	1	13	12	23	0			Screen time – babies learn best through doing things with you. Screen time is not recommended for children younger than 2 years. Make the most of playtime – turn off all screens including phones, TVs and computers.	1	opportunities for learning,	0
56	Play	Web Site - Commercial Entity	5 fun ways to play with your baby from 4 weeks to 12 weeks old	https://lovevery.com/a/blog/5-fun-ways-to-play-with-your-4-12-week-old-baby/	2018	0		0		0			1	1	1	5	2	4	1	Talking with your baby is one of the very best things you can do to help build his developing brain. The more you talk with him, the more he understands, and the more he’ll eventually learn to say by himself.	Early Experiences,		1	Talking reading singing,	0
57	Play	Web Site - Commercial Entity	How to Play With Your 2-Month-Old	https://www.pampers.com/en-us/newborn-baby/tummy-time/article/newborn-play-activities-with-a-2-month-old	2019	0		0		0			1	1	1	3	3	1	0				0		0
58	Play	Web Site - Individual	Baby Play Ideas: Starting Out with Water Play	https://childhood101.com/baby-play-ideas-water-play/	2019	0		1	Hi, I’m Christie Burnett – a teacher, author and mother of two. I’ve spent my career teaching kids in preschool, kindergarten, the early years of primary or elementary school and child care, and now writing on and offline to create fun, educational resources for parents and teachers of children of all ages.	1	Early Childhood Education, Parent		1	1	1	1	1	6	0				0		0
59	Play	Web Site - Individual	Important activities for your baby	https://www.yourmodernfamily.com/teach-your-baby-6-12-months/	2021	0		1	play therapist with a background in elementary education & child development	1	Early Childhood Education, Parent, Human Services	Certified child development therapist, writer	1	1	1	16	8	3	0				0		0
60	Play	Web Site - Professional Organization	Ball play – Baby	https://playgroupwa.com.au/ideas/ball-play-baby/	N/A	0		0		0			1	1	1	3	3	3	0		learn through play,	Early ball play helps develop hand-eye coordination.	0		0
61	Play	Web Site - Professional Organization	Babies - 0-9 Months	http://www.maketime2play.co.uk/fun-forever/babies/	N/A	0		0		0			1	1	1	8	6	13	0	Between three and six months your baby will begin to gain control of head and arm movements which will enable them to control actions such as grasping, rolling, supporting their upper body, reaching and swiping at moving objects. At this age they will begin to locate sounds and start to co-ordinate hand and eye movements, recognising people and objects at a distance. Importantly your baby will be…	Early Experiences, learn through play, responsive communication,	Simple shapes, primary colours and toys which make a sound create a stimulating environment that can help them develop both attention span and curiosity. Baby gyms, which have objects dangling down, are perfect for their flailing limbs, as the various noises, and textures of the objects they collide with will be entertaining. These types of toys will encourage the movement of arms and legs and st…	1	safe envrionment, Talking reading singing,	0
62	Play	Web Site - Professional Organization	Play ideas for your 6 month old	http://www.bounty.com/baby-0-to-12-months/development/play-ideas-for-your-6-month-old	N/A	0		0		0			1	1	1	5	4	3	0				0		0
63	Play	Web Site - Professional Organization	Building babies’ brains through play: Mini Parenting Master Class	https://www.unicef.org/parenting/child-development/building-babies-brains-through-play-class	N/A	0	MD	1	Jack P. Shonkoff, M.D., is the Julius B. Richmond FAMRI Professor of Child Health and Development at the Harvard T.H. Chan School of Public Health and the Harvard Graduate School of Education; Professor of Pediatrics at Harvard Medical School and Boston Children’s Hospital; and Founding Director of the university-wide Center on the Developing Child at Harvard University.	1	Health Care Education		1	1	0	4	2		1	The early years are important because the experiences young children have and the relationships they have with the important people in their lives literally shape the development of their brain.	Early Experiences,	The early years are important because the experiences young children have and the relationships they have with the important people in their lives literally shape the development of their brain.	1	parent bonding and PCI,	0
64	Play	Web Site - Professional Organization	PLAY IN YOUR CHILD’S DEVELOPMENT	https://centerforparentingeducation.org/library-of-articles/baby-through-preschool-articles/growing-through-play-the-importance-of-play-in-your-childs-development/	N/A	0		0		0			1	1	1	6	1	8	1	Play is any activity which one enjoys doing. Play is crucial to healthy development. Children practice many skills and discover concepts through play.	learn through play, responsive communication,	Children are great mimics and will repeat the behaviors of their parents and other adults	0		0
65	Play	Web Site - Individual	20 Ways to Play with a 0-3 Month Old	https://nurturednoggins.com/2016/03/25/20-ways-play-with-0-3-month-old/	N/A	0		0	I'm a child development specialist, parent coach and teacher trainer. I've cared for countless babies in child development programs, plus 3 kids, 3 grand babies and 5 foster babies! I LOVE babies and would come hold yours if I could	1	Parent, Human Services	child development specialist, parent coach and teacher trainer.	1	1	1	20	2	7	0				0		0
66	Play	Web Site - Professional Organization	Baby Talk: Communicating With Your Baby	https://www.webmd.com/parenting/baby/baby-talk#1	2022	0		0		0			1	1	1	7	7	2	1	As you introduce your baby to simple, short words like "cup" and "ball," hold up the object to show that it's related to your speech. Read colorful picture books to your baby. Point to the pictures, and name simple objects to reinforce his early speech development and model the importance of language and reading. Practice using short words and then pausing. This will allow your baby to respond wi…	responsive communication,	Babies love to hear you talk -- especially to them, and especially in a warm, happy voice. Babies learn to speak by imitating the sounds they hear around them. So the more you talk to your baby, the faster he will acquire speech and language skills.	1	Talking reading singing,	0
67	Play	Web Site - Individual	BABY WATER PLAY – SENSORY AND MOTOR PLAY	https://www.pinkoatmeal.com/baby-water-play/	2014	0	Physical Therapist	1	Chanda Blogger. Physical Therapist. Mom.	1	Health Care Education, Parent		1	0	1	1		7	0				0		0	BEFORE I TRIED THIS I WAS CERTAIN MY BABY HAD GOOD HEAD CONTROL and UPPER BODY CONTROL AND I WAS SUPERVISING AT ALL TIMES.
68	Play	Web Site - Professional Organization	How Babies Learn More With Mirror Games	https://www.verywellfamily.com/baby-play-mirror-mirror-on-the-wall-284256	2019	0	Bachelor of Science in elementary education from Millersville University and a Master's in education from Penn State University.	1	Jennifer White is a former writer for Verywell Family covering parenting. She has authored parenting books and has worked in childcare and education fields for over 15 years. She now focuses much of her energy on raising her four children, participating in child-related community service projects, and expressing her views on parenting as a freelance writer; she has taken multiple workshops under …	1	Parent, Early Childhood Education, Other	Masters Library Science	1	1	1	3	2	3	0	Believe it or not, your baby won't realize that he's looking at his own reflection until somewhere around 9 months of age. To "test" to see if he's got the concept, unbeknownst to him place a small sticker or spot of lipstick on his face. When he sits in front of the mirror, if he tries to wipe it off his own face and not the face of the baby in the mirror then he has it all figured out.			0		1	When your baby is 9 to 12 months old, you can harness that fascination to develop several skills: eye-hand coordination, language, and listening skills, and imitation. Once a baby's vision begins to develop, they love to look at faces, even their own	this milestone then,
69	Play	Web Site - Individual	40+ Brain-Boosting Baby Activities	https://www.raisesmartkid.com/pre-natal-to-1-year-old/2-articles/48-infant-stimulation-how-playing-with-your-baby-makes-her-smart	2015	0		0		0			1	0	1	46		15	0				0		0
70	Play	Web Site - Professional Organization	10 ways to encourage your baby to play longer with toys	https://www.youngparents.com.sg/pregnancy-baby/10-ways-encourage-your-baby-play-longer-toys/	2019	0	By Dr Richard C. Woolfson	1		0	Unspecified	Unspecified	1	0	0	10			0	Your toddler’s attention span is short. To prolong his interest, it must grab his attention and be suitable for his age.;Your toddler’s attention span is short. To prolong his interest, it must grab his attention and be suitable for his age.		Research shows that a young child remains interested in a toy for longer when one of his parents sits beside him.	1	opportunities for learning,	0
71	Play	Web Site - Individual	BABY PLAY IDEAS AND ACTIVITIES: 6-18 MONTHS	https://theimaginationtree.com/baby-play-ideas-and-activities-6-18/	N/A	0		1	I am a primary school teacher from the UK with a specialism in early years education and art. I taught for nearly 10 years in a large inner-city primary school as the head of early years and art and was a lead early years teacher for the local borough, helping newer teachers.	1	Early Childhood Education		1	0	1	20		18	0				0		0
72	Play	Web Site - Commercial Entity	Games to Play with Babies	https://www.johnsonsbaby.co.uk/play-and-learning/how-to-play-with-a-baby	2019	0		0		0			1	1	1	4	3	3	0				0		0
73	Play	Web Site - Individual	Balloon kicking activity for babies	https://laughingkidslearn.com/balloon-kicking-activity-for-babies/	2015	0		0	My name is Kate and I am a mum to two little girls,	1	Parent		1	1	1	1	3	1	0				0		1	I would, however, strongly recommend you do this with your child when they are not able to roll and not yet interested in eating everything.	this milestone then,
74	Play	App - Professional Organization	Baby sparks		2020	4.99	Dr. Jaime Edelstein (MD), Maria Teresa Arango (PT, DPT), Maria Gabriela Quintana (OT), Claryza Pujol, Ivonne Magdaleno (M.Ed)	1		0	Health Care Education, Early Childhood Education		1	1	1	353	347	80	1	During the first years of life, a child's brain creates more thanone million new neural conncections every second. During thse critical years, consistently reinforcing a broad range of postive experiences nutures optimal brain development and has a lifelong impact.	Early Experiences,		0		1	Activities include suggested times; "You don't have to do all activities in a single session. If your baby gets disengaged or fussy, discontinue and resume later in the day. For young babies and those new to the program, their attention span must be short. Over time, they will stay engaged for longer."	overstimulated,
75	Play	Web Site - Professional Organization	Baby play: Having fun with your newborn	https://www.aptaclub.co.uk/baby/bonding-and-development/first-fun.html	2016	0		0		0			1	1	1	10	2	5	0				0		0
76	Play	Web Site - Professional Organization	Baby Tummy Time: Safe Play for Healthy Development	https://www.education.com/magazine/article/baby-tummy-time/	2012	0		0		0			1	1	1	5	4	2	0				0		0
77	Play	Web Site - Individual	5 Ways to Play with Baby Using Gerber’s Plastic Containers	https://parentingchaos.com/5-ways-to-play-with-baby-using-gerbers-plastic-containers/	N/A	0		0	Parenting blogger and early childhood intervention specialist. Mom of four, coffee addict, nature junkie, book loving, kid at heart!	1	Parent, Human Services	Early Intervention Specialist	1	1	1	5	9	10	0				0		0	Is your baby in the crawling stage?
78	Play	Web Site - Professional Organization	Games to Play with Babies	https://www.johnsonsbaby.com.au/play-and-learning/how-to-play-with-a-baby	2022	0		0		0			1	1	1	4	4	3	1	As you play with your baby, engage all of their senses: eyes, ears, nose, hands and mouth. These are the tools that they use to explore and learn about the world. To engage all their senses try some of the following games.	learn through play, play using their senses, learn through exploring objects,	Seeing delight in your baby’s eyes and hearing their laughter are reasons enough to enjoy playing with them. However, there is an even better reason to enjoy playing with them- it also helps development.	1	opportunities for learning,	0
79	Play	Web Site - Professional Organization	12 Easy DIY Sensory Activities to Entertain Babies	https://mommypoppins.com/new-york-city-kids/boredom-busters/12-easy-diy-sensory-activities-for-babies	2018	0		0		0			1	1	1	12	7	14	0				0		0
80	Play	Web Site - Individual	Activities for Babies	https://handsonaswegrow.com/activities/baby-play/	N/A	0		0	Jamie is a marketing manager and stay at home mom	1	Parent		1	1	1	37	2	23	0				0		0
81	Play	Web Site - Professional Organization	Cause and effect games to play with babies	https://www.essentialparent.com/lesson/cause-and-effect-games-to-play-with-babies-1963/	N/A	0	Child development expert with a Phd from Cambridge University.	1	She has worked on several best-selling books and BBC documentaries. She is the proud mother of three children.	1	Parent, Human Services	Child development expert	1	1	1	2	2	5	1	Babies instinctively know the games to play to promote their development and they are very curious and natural little scientists. They notice cause and effect when they can hold and manipulate things in their hands.	learn through exploring objects,		0		0
82	Play	Web Site - Individual	BABY, LET’S LEARN AND PLAY! ACTIVITIES FOR BABIES 1 YEAR AND BELOW (PART 1)	https://wholovesbabies.com/baby-lets-learn-and-play-part1/	2017	0		0	Mom	1	Parent		1	1	1	18	8	7	1	During the first year, your baby’s brain is growing and developing at the fastest rate. It is therefore important that we, as parents, play and connect with our babies. Not only does it help in their brain and cognitive development, such play activities are vital for their social and emotional development. It is through interactions with their trusted caregivers that they learn about the world an…	Early Experiences, learn through play, fast or slow,	Not only does it help in their brain and cognitive development, such play activities are vital for their social and emotional development. It is through interactions with their trusted caregivers that they learn about the world and social cues, as well as build up their self-esteem.	1	opportunities for learning, parent bonding and PCI,	1	Remember to give sufficient time for your baby to respond and if he/she looks away (or needs a break), allow him/her to do so. Do not pressurize or frustrate the baby.	overstimulated,
83	Play	Web Site - Popular Press	How to Play with Babies? Tips for Parents	https://www.prokerala.com/kids/activities/how-to-play-with-babies.htm	2017	0		0		0			1	0	0	3			0				0		0
84	Play	Web Site - Professional Organization	Happy social play with your baby	https://www.pbcexpo.com.au/baby/baby-development/happy-social-play/	2021	0		0		0			1	0	1	12		2	0		learn through play,	Happy social play has an essential role in building self-esteem, confidence, creativity, imagination, language, problem solving skills and knowledge of the world. It is also a vital component for intellectual and physical development and an important step in helping babies learn about the subtleties of human interaction.	0		0
85	Play	Web Site - Individual	Toy Guide	https://www.respectfulcaregiving.org/toy-guide	2019	0		0		0			1	1	1	11	10	58	0				0		0
86	Play	Web Site - Professional Organization	6 Listening Games to Play with Your Baby	https://blog.medel.com/6-listening-games-to-play-with-your-baby/	2015	0		1	Donna Sperandio is a Listening and Spoken Language Specialist who currently works as Head of Rehabilitation for MED-EL. She has worked for twenty years in clinical rehabilitation positions in Australasia and the UK, and has trained rehabilitation specialists around the world.	1	Other	Listening and Spoken Language Specialist who currently works as Head of Rehabilitation for MED-EL.	1	1	1	6	1	11	0				0		0
87	Play	Web Site - Professional Organization	BENEFITS OF PLAY AND GAMES WITH BABIES	https://www.emmasdiary.co.uk/baby/lets-play/baby-fun-and-games	2019	0		0		0			1	1	1	9	6	12	1	Your baby's hearing is quite well developed at birth so during the first few months they will spend time learning how to locate the source of the noises they can hear....When your baby becomes stronger and their movements are more controlled theye will start to reach out for things to hold. This is how they find out about the difference between things being light and heavy, hard and soft.	play using their senses, learn through exploring objects,		0		1	Once your baby has gained control of their head they will enjoy games which involve more rough and tumble, such as being held so that she is flying through the air and jumping up and down while you hold them.	this milestone then,
88	Play	Web Site - Professional Organization	How to Play With a Newborn	https://www.workingmother.com/momlife/13707609/how-to-play-with-a-newborn/	2017	0		0		0			1	1	1	8	1	3	0				0		0
89	Play	Web Site - Popular Press	6 Tips for Playing With Your Baby	https://community.today.com/parentingteam/post/6-tips-for-playing-with-your-baby	2016	0		0		0			1	1	1	6	3	6	0			While they may not be able to take a toy car or doll and imagine some intricate scenario in their mind, babies need a certain amount of physical and cognitive play every day. Before you know it, you’ll become a pro at keeping them busy from a very young age, and they’ll be wowing you with the way they start to master all of their major milestones.	1	opportunities for learning,	1	Once your baby isn’t so small, fragile, and immobile, they will be ready for a jumper.... When your baby is enjoying tummy time, throw some objects into the mix... .Once your baby begins to walk, you can adjust the toy to their height level and attach wheels and a handle to encourage supported steps!	this milestone then,
90	Play	Web Site - Professional Organization	How to Play With Your Baby: Games for 0-12 Months Old Babies	https://thelovelist.net/how-to-play-with-your-baby/	2021	0		0	"years of study in developmental science"	1	Other	Developmental science	1	1	1	57	4	10	0	Months 4-6 will show advanced changes in motor skills and perceived awareness in your baby. Tummy time is still important, but now it might also be time to start sitting and teething.		It’s time to baby-proof the house as your little one is likely crawling, climbing, pulling and possibly spouting iterations of mama or dada.	1	safe envrionment,	1	Now that your baby has some tummy power, he can start to roll over and even sit up.	this milestone then,
91	Play	Book - Individual	How to Play with Babies	https://books.google.com/books?id=zv6LDwAAQBAJ&pg=PT11&lpg=PT11&dq=how+to+play+with+baby&source=bl&ots=91qZz9uoSR&sig=ACfU3U19Z4fl0lOWBsn6nKHoRG7MncrTvw&hl=en&ppis=_c&sa=X&ved=2ahUKEwikie6VqfvkAhUtT98KHScoAj04eBDoATAEegQIExAB#v=onepage&q=how%20to%20play%20with%20baby&f=false	2019	4.9912		1	My studies at college were focused on pedagogy for children in early school age. I love to create illustrated books for them to improve their love for study. I was worked for many years as a teacher in kindergarten. Also, I love fitness and healthy lifestyle. I´m also a certified yoga teacher and with passion for it	1	Early Childhood Education		1	1	1	104	143	38	0		learn through play,	Your baby will be happy with the games you will learn in this book. These games will improve your baby's motor skills, communication skills, concentration, intelligence, creativity, imagination, and memory. Your baby will sleep better, as never before, thanks to spending time with its mommy and whilst playing nice, cute and worthful games.	1	opportunities for learning,	1	Babies in the eleventh month love to play with differnt toys, things, and so on. This is the perfect time to play this game.	this milestone then,
92	Play	Web Site - Individual	25 WAYS TO PLAY WITH YOUR NEW BABY! (BABY ACTIVITIES FOR 0-3 MONTHS)	https://mnmomma.com/how-to-play-with-newborn-baby/	2019	0		1	Mom, Wife, Nurse, & Blogger	1	Parent, Health Care Education		1	1	1	25	7	11	0	Baby’s early vision isn’t great. But as time goes by it greatly improves!			0		0	Lift his/her head while on his/her tummy. Your baby will get better at this as they grow, but many newborns can lift and turn their heads very early in life.
93	Play	Book - Individual	Peekaboo and Other Games to Play With Your Baby (Tools for Everyday Parenting Series)	https://www.amazon.com/s?k=9780943990811&i=stripbooks&linkCode=qs	1995	5.96		0		0			1	1	1	59	37	58	0		learn through play,	"She hasn't learned yet that people and things she can't see still exist. This game will help her start to learn this." It also allows him to solve a problem all by himself." "This game helps him practice seeing something and then touching it." "This game will help your baby connect the noises she hears with the things that make them." : Parents can gie them lots of chances to play and learn"	1	opportunities for learning,	1	If your baby acts bored or fussy, stop playing. You can tell if your baby feels this way if she does some of these things: clenches her fists, purses her lips, curls her toes, squirms a lot, looks away, sneezes, or yawns. Don't try to make your baby play something she doesn't like. If he seems unsure or afraid of anything, stop or slow down.	overstimulated, babys lead,
94	Play	Web Site - Individual	The Beginners Guide to Playing with your Baby	https://inspirationtoplay.com/beginners-guide-to-playing-with-your-baby/	2019	0	pediatric occupational therapist,	1	I am also a first-time mom	1	Parent, Health Care Education		1	1	1	10	5	15	1	but it is still important to work on tummy time to help their upper body get strong to work on crawling. It is great to work on sitting balance with cushions around them with rattles and toys for them to explore. As they get stronger with sitting, placing toys up for them to have to raise their arms and reach for toys hanging up high will help them work on their upper arm strength; You and your l…	learn through play,	Play is essential to development because it contributes to the cognitive, physical, social, and emotional well-being of children and youth. Play also offers an ideal opportunity for parents to engage fully with their children.	1	opportunities for learning, parent bonding and PCI,	1	Learn to read your baby’s signals. If they start to get fussy, look away, yawn, or become upset. This is probably not the best time to play. Figure out what they are needing and meet their needs first.	overstimulated,
95	Play	Web Site - Professional Organization	How to play with your newborn	http://www.essentialbaby.com.au/baby/education-play/how-to-play-with-your-newborn-20150424-1mse2f	2015	0		0		0			1	1	1	4	3	8	0			Reading, singing and talking to your newborn stimulates their brain, laying the foundations for the development of speech and language.	1	Talking reading singing,	0
96	Milestone	Web Site - Professional Organization	Baby Milestones Slideshow: Your Child's First Year of Development	https://www.webmd.com/parenting/baby/ss/slideshow-baby-milestones-first-year	2021	0		0		0			1	1	0	2	22		0				0		0
97	Development, Milestone	Web Site - Professional Organization	Baby’s First Year: How Infants Develop	https://www.webmd.com/parenting/baby/features/stages-of-development#1	2022	0		0		0			1	1	0	2	25		0	During this first development stage, babies’ bodies and brains are learning to live in the outside world. Between birth and three months, your baby may start to:			0		0
98	Development,Milestone	Web Site - Professional Organization	First Year Development: Infant Development	https://americanpregnancy.org/first-year-of-life/first-year-development/	N/A	0		0		0			0	1	0		280		1	Comparing your baby's development to other infants or to norms on developmental charts should be avoided. Instead it is important to know that babies develop at different rates and should only be compared to their individual milestones from the previous week or month.	own pace,		0		0
99	Development,Milestone	Web Site - Professional Organization	A Visual Guide to Baby’s First-Year Milestones	https://www.thebump.com/a/everything-you-need-to-know-about-babys-first-year-infographic	2017	0		0		0			0	1	0		74		0				0		0
100	Development,Milestone	Web Site - Professional Organization	DEVELOPMENTAL MILESTONES FOR BABY	https://www.marchofdimes.org/baby/developmental-milestones-for-baby.aspx	2019	0		0		0			0	1	1		108	4	0		fast or slow,	Your baby is starting to show more control over their bodies by rolling over. They might also show signs they're ready for solid foods by holding up their head when sitting, or teething. It's amazing how quickly they start developing new skills! Be sure to adjust for prematurity. If your child is missing milestones, be sure to talk with your healthcare provider. Missing one or two abilities shoul…	1	concerns to PCP,	0
101	Development,Milestone	Web Site - Professional Organization	0-3; 4-6; 7-9; 10-12 Months Overview	https://pathways.org/growth-development/0-3-months/overview/	2020	0	https://pathways.org/our-people/	1		0	Health Care Education		1	1	1	510	522	129	1	In the first years of baby’s life, their brain has a tremendous ability to learn and create new neural pathways, otherwise known as neuroplasticity. In fact, the greatest period of neuroplasticity is from birth to 3 years of age with baby’s brain developing between a million new neural connections every second. So What Does This Really Mean? Baby is constantly learning. And there is a great oppor…	Early Experiences, learn through play, always learning,	Encourage baby to crawl around inside house. Roll a soft ball across the room. Tell baby they should go for the “ball” and use the words, “Ready, set, go.” Helps baby use crawling to build core strength and develop listening skills.	1	opportunities for learning,	0	Your baby is starting to show more control over their bodies by rolling over. They might also show signs they're ready for solid foods by holding up their head when sitting, or teething. It's amazing how quickly they start developing new skills! Be sure to adjust for prematurity. If your child is missing milestones, be sure to talk with your healthcare provider. Missing one or two abilities shoul…
105	Milestone	Web Site - Professional Organization	Baby & Toddler Development Milestones: 0-3; 4-6; 7-9; 10-12 Months	https://www.whattoexpect.com/milestones/0-3-months/	2019	0	Jennifer Kelly Geddes	1	From the What to Expect editorial team and Heidi Murkoff, author of What to Expect the First Year. Health information on this site is based on peer-reviewed medical journals and highly respected health organizations and institutions including ACOG (American College of Obstetricians and Gynecologists), CDC (Centers for Disease Control and Prevention) and AAP (American Academy of Pediatrics), as we…	1	Health Care Education		1	1	1	222	271	198	1	But experts agree that incorporating some supervised tummy time into playtime helps babies develop the neck, chest and arm muscles that allow them to lift their heads independently and use their forearms to support the upper body; Remember, too, that all babies hit developmental milestones like lifting the head at their own pace and in their own time. It may take weeks of tummy time before your b…	own pace, responsive communication,	The simple act of describing what you're doing as you dress your baby, cook dinner or walk down the street will help your baby begin to recognize words, labels and sound combinations; Even though your baby won't understand exactly what you mean, she'll see you modeling the back-and-forth of conversation.	1	opportunities for learning, Talking reading singing,	1	Until they develop the muscles necessary to lift their heads from an awkward face-plant position, many babies hate tummy time (and squall indignantly to let you know it!). Others seem to love the view. And still others are indifferent, cooing happily no matter which end is up.; Several articles are linked with questions such as "When Can Your Baby Sleep on Her Stomach?"; It's nearly impossible to…	this milestone then, overstimulated,
109	Development,Milestone	Web Site - Popular Press	Infant Milestones Month to Month	https://www.emedicinehealth.com/infant_milestones/article_em.htm#what_should_i_know_about_infant_and_baby_milestones	N/A	0	John Mersch, MD, FAAP William C. Shiel Jr., MD, FACP, FACR	1		0	Health Care Education		0	1	0		130		1	During the first month of life, most of a baby's behavior is reflexive, meaning that his/her reactions are automatic. Later, as the nervous system matures, a baby will become capable of putting more thought into their actions.	specific order,		0		0
110	Milestone	Web Site - Professional Organization	First-year milestones	https://www.todaysparent.com/baby/baby-development/first-year-milestones/	2007	0		0		0			0	1	1		136	2	0				0		0
111	Milestone	Web Site - Professional Organization	Baby milestones: What to expect and when	http://www.bounty.com/baby-0-to-12-months/development/baby-development-milestones-timeline	2019	0		0		0			1	1	0	6	64		0			You can help them to get ready to roll over by laying down with them and giving them loads of encouragement and putting a toy just out to reach to see if they try and roll to reach it; lots of repetition will help them learn to copy what you do	1	opportunities for learning,	0
112	Milestone	Web Site - Professional Organization	Milestones To Expect In Your Baby’s First Year	https://www.parentscanada.com/baby/milestones-the-first-year/	2007	0	Katerina Haka-Ikse, MD, FRCP(C), FAAP	1		0	Health Care Education		0	1	0		128		0				0		0
113	Development,Milestone	Web Site - Professional Organization	Infants (0-1 year of age)	https://www.cdc.gov/ncbddd/childdevelopment/positiveparenting/infants.html	2021	0		0		0			1	1	0	18	12		0	Cognitive, or brain development means the learning process of memory, language, thinking, and reasoning. Learning language is more than making sounds (“babble”), or saying “ma-ma” and “da-da”. Listening, understanding, and knowing the names of people and things are all a part of language development.	responsive communication,	Answer when your baby makes sounds by repeating the sounds and adding words. This will help him learn to use language.	0		1	Play with your baby when she’s alert and relaxed. Watch your baby closely for signs of being tired or fussy so that she can take a break from playing.	Awake and Alert, overstimulated,
115	Development, Milestone	Web Site - Professional Organization	Baby milestones: 1 to 6 months	https://www.babycenter.com/0_baby-milestones-1-to-6-months_1496585.bc	2021	0		0	Darienne Hosley Stewart is a content strategist, writer, and editor	1	Other	content strategist, writer, and editor	0	1	1		128	1	1	Each child is unique and develops at her own pace. There's a wide range of what's considered normal, and you probably don't need to be concerned unless you notice one of the red flags described below.	own pace,		0		0
116	Development, Milestone	Web Site - Professional Organization	Baby Milestones Chart: A Week-by-Week Guide to Development	https://www.parents.com/baby/development/growth/baby-development-week-by-week/	2022	0		0		0			1	1	1	9	78	4	1	Babies develop muscle coordination from the head down	specific order,		0		0
117	Milestone	Web Site - Professional Organization	Baby milestones: one to six months	https://www.parents.com/baby/development/growth/baby-development-week-by-week/	2019	0		0		0			1	1	1	54	104	20	1	If you’re curious about baby’s growth, check out these guidelines for 52 wonderful weeks of development. And don't worry if your baby isn't doing exactly what's described in the baby milestone chart; every child grows in a way that's entirely unique and individual. Always discuss questions and concerns with your pediatrician.	own pace,	Listed in play activities	0		0	While every baby develops at his own pace, experts can guess when certain milestones are likely to happen. Use this baby development chart as a guideline during your little one’s first year. Weeks 1-52 instructions.
118	Milestone	Web Site - Professional Organization	Milestones During The First 2 Years	https://www.healthychildren.org/English/ages-stages/toddler/Pages/Milestones-During-The-First-2-Years.aspx	2012	0		0		0			0	1	1		48	4	0				0		0
119	Development,Milestone	Web Site - Professional Organization	Developmental Milestones From Birth to Age 1	https://www.understood.org/en/learning-thinking-differences/signs-symptoms/developmental-milestones/developmental-milestones-from-birth-to-age-1	N/A	0	Molly Algermissen, PhD is an associate professor of medical psychology at Columbia University Medical Center and clinical director of PROMISE.	1	Amanda Morin worked as a classroom teacher and as an early intervention specialist for 10 years. She is the author of The Everything Parent’s Guide to Special Education. Two of her children have learning differences.	1	Parent, Health Care Education, Early Childhood Education		0	1	0		204		0				0		0
120	Development,Milestone	Web Site - Professional Organization	Infant development: Birth to 3 months	https://www.mayoclinic.org/healthy-lifestyle/infant-and-toddler-health/in-depth/infant-development/art-20048012	2017	0		0		0			1	1	0	8	24		1	A lot happens during your baby's first three months. Most babies reach certain milestones at similar ages, but infant development isn't an exact science. Expect your baby to grow and develop at his or her own pace. As you get to know your baby, consider these general infant development milestones.	own pace,	Simple conversation lays the groundwork for language development.	1	Talking reading singing,	0
121	Development,Milestone	Web Site - Professional Organization	Get Ready for All These Precious First-Year Milestones	https://www.healthline.com/health/baby/baby-development-stages	N/A	0	Medically reviewed by Karen Richardson Gill, MD, FAAP, specialty in pediatrics, onSeptember 18, 2019 —	1	Medically reviewed by Karen Richardson Gill, MD, FAAP, specialty in pediatrics, onSeptember 18, 2019 —	1	Health Care Education		0	1	0		128		1	Remember that the average ages for reaching certain milestones are just that — averages. Some babies will do things earlier, while others will do them later — and that’s all usually OK.	own pace,	Given that they are now getting better and better at grasping and holding objects, the American Academy of Pediatrics says 6 months is a good time to begin to encourage your baby to use spoons and their hands to feed themselves. (We’re warning you: It won’t be pretty.) You can even introduce a sippy cup or regular cup with help.	1	opportunities for learning,	0
122	Milestone	Web Site - Professional Organization	Milestones to watch for during your baby's first year	https://intermountainhealthcare.org/blogs/topics/intermountain-moms/2018/06/milestones-to-watch-for-during-your-babys-first-year/	2018	0		1	Nurse Dani is an labor and delivery nurse at Utah Valley Regional Medical Center.	1	Health Care Education		1	1	1	6	90	2	0				0		0
123	Milestone	Web Site - Popular Press	Developmental milestones: the first year	http://www.essentialbaby.com.au/baby/development/0-6-months/developmental-milestones-the-first-year-20080919-4k25	2010	0		0		0			0	1	0		110		1	a baby's developmental progress does vary greatly. Some children may miss out on developmental milestones all together. Babies and infants will develop at differing levels depending on factors including their emotional and physical health.	own pace,	If you have any concerns about your child's development, talk to your GP or early childhood nurse.	1	concerns to PCP,	0
124	Milestone	Web Site - Popular Press	Your baby: 10 milestones for the first 2 years	http://edition.cnn.com/2007/HEALTH/parenting/06/07/par.baby.milestones/	2007	0		0	Maureen Connolly is a former Parenting health editor and a mom of three boys.	1	Parent, Other	Parenting health editor	1	1	1	12	20	2	0	Every milestone - from when your baby first holds up her sweet little head to when she speaks her first word - is thrilling. These moments aren't just exciting and fun; they're also markers that can clue you in to your baby's development. Most parents already know to look for the much-lauded ones, like rolling over and walking. But of the multitude of milestones cited by the American Academy of P…			0		0
125	Milestone	Web Site - Professional Organization	Your 1-Week-Old Baby’s Development	https://www.verywellfamily.com/your-one-week-old-baby-development-and-milestones-4169487	2022	0	RN	1	Chaunie Brusie is a registered nurse with experience in long-term, critical care, and obstetrical and pediatric nursing.	1	Health Care Education		0	1	0		16		0				0		0
126	Milestone	Web Site - Professional Organization	About baby development and developmental milestones	https://raisingchildren.net.au/newborns/development/understanding-development/baby-development	2020	0		0		0			0	1	0		18		1	All babies grow and reach development milestones at different times. Development milestones relate to your baby’s ability to move, see, hear, communicate and interact with others. It’s normal for babies to do things like waving, clapping or making a particular sound, then suddenly stop. These things usually reappear. It might be that your baby is fascinated by learning a new task.	own pace, learn through Repetition, domains interrelated,	if your baby shows signs of forgetting skills over several months or if you’re concerned, you should talk to your GP, child and family health nurse or paediatrician.	1	concerns to PCP,	0
127	Milestone	Web Site - Professional Organization	Developmental Milestones: The First Year	https://www.parentline.com.au/pregnancy-babies/issues/developmental-milestones-first-year	2018	0		0		0			0	1	0		92		0		responsive communication,	How can you support your baby’s development? Here are some tips that can help: Respond to crying with comfort Introduce healthy and nutritious solid food at around 6 months Reassure your child when they meet new people Make your home baby safe when they become mobile Listen and respond to your baby’s sounds and cues Seek medical assistance to manage health conditions Develop a routine around feed…	1	opportunities for learning, parent bonding and PCI, safe envrionment, Talking reading singing, concerns to PCP,	0
128	Milestone	Web Site - Professional Organization	Baby Milestones in the First Year of Life	https://mommybites.com/col1/baby/baby-milestones-first-year-life/	2014	0	Dr	1	Ali is a board certified pediatrician who practiced general pediatrics for five years in a busy private practice in Manhattan NY. She since has moved into the pharmaceutical industry and oversees and mentors many physicians globally. She enjoys sharing her knowledge and experiences as a pediatrician with other moms and dads. Ali’s outside interests include working out, acting, piano, guitar, danc…	1	Parent, Health Care Education		1	1	1	12	56	6	0				0		0
129	Development,Milestone	Web Site - Popular Press	Your Child’s Development	https://parenting.nytimes.com/milestones	2019	0		0		0			0	1	0		62		0				0		0
130	Development,Milestone	Web Site - Professional Organization	Baby milestones: Parenting tipsDate	https://www.unicef.org/parenting/child-development/baby-milestones#9-12-months	N/A	0		0		0			1	0	1	66		24	0				0		0
131	Milestone	Web Site - Professional Organization	Baby's First Year: Senses and Milestones	https://www.pinterest.com/pin/79798224622194228/	N/A	0		0		0			0	1	0		66		0				0		0
132	Development,Milestone	Web Site - Professional Organization	Motor milestones: How do babies develop during the first two years?	https://www.parentingscience.com/motor-milestones.html	2019	0	Ph.D.	1		0	Parent, Other	evolutionary anthropology, behavioral ecology, primatology, and comparative psychology.	1	1	0	10	30		1	Motor milestones mark exciting transitions in a baby's life, but there is no single, universal schedule that all babies follow.	own pace, learn through play,	As we'll see, a baby's environment - and personal quirks - affect the timing of motor milestones. Babies develop skills faster when we encourage them to practice opportunities to practice.	1	opportunities for learning, safe envrionment,	0
133	Development, Milestone	Web Site - Commercial Entity	Newborn Baby: The First 4 Weeks; 1-Month-Old Baby: Settling In; 2-Month-Old Baby:Happiness and Comfort in Familiar Faces; 3-Month-Old Baby:Getting into a Groove; 4-Month-Old Baby:Putting Some Personality on Display; 5-Month-Old Baby: Twice the Size, Double the Fun; 6-Month-Old Baby: Get Ready for That Toothy Grin!; 7-Month-Old Baby: Your Baby Is a Copycat; 8-Month-Old Baby: Big Moves Ahead;9-Mont…	https://www.pampers.com/en-us/newborn-baby/development/article/0-month-old-baby	2018-2022	0		0		0			1	1	1	77	229	41	1	In the first few days after birth babies can lose a little weight - this is mostly excess body fluid. Most babies will regain the weight quickly, so that by day 10, they're back to their birth weight. Your healthcare provider will track your baby's growth carefully, measuring his lenght, weight, and head circumference at each checkup. Over time, your provider will use these measurements to gauge …	learn through play, learn through exploring objects,	Playing and interacting with you both have a huge role in your baby’s brain development and early learning;Your attention tells him that his voice is important too and helps build trust.;Your pediatrician will share a variety of ways you can help foster your baby's development. Many of these suggested activities will encourage movement and help your baby master the skills she will need to roll, s…	1	opportunities for learning, parent bonding and PCI, safe envrionment, Talking reading singing,	1	Now that your baby has turned 8 months old, you may be finding that he's more curious and active than ever before. His muscles are getting stronger, and he's getting ready to use those legs for crawling, scooting, and eventually walking. Here's what you need to know about sleeping, feeding, health concerns, and more so you'll be prepared during this exciting time of growth and development.	this milestone then,
146	Milestone	Web Site - Popular Press	The Milestones Your Baby Reaches In The First Year, A Month By Month Guide	https://www.romper.com/p/the-milestones-your-baby-reaches-in-the-first-year-a-month-by-month-guide-23269	2016	0		0		0			0	1	0		102		0				0		0
147	Milestone	Web Site - Professional Organization	Developmental milestones record	https://medlineplus.gov/ency/article/002002.htm	2019	0		0		0			0	1	0		22		1	Below is a general list of some of the things you might see children doing at different ages. These are NOT precise guidelines. There are many different normal paces and patterns of development.	own pace,		0		0
148	Milestone	Web Site - Professional Organization	Printable Month-by-Month Developmental Milestone Chart	https://www.familyeducation.com/printables/parenting-tools-printables/printable-month-month-developmental-milestone-chart	N/A	0		0		0			0	1	0		170		0				0		0
149	Milestone	Web Site - Professional Organization	Infant Milestones (0-1 Year)	https://www.northshore.org/pediatrics/ages-and-milestones/infant/	N/A	0		0		0			0	1	0		86		1	Your newborn will grow and change more in the first year of life than during any time, making it an exciting and sometimes nerve-wracking age for parents. During this time of rapid growth and physical development, make sure to take your infant in for the regular checkups recommended by your pediatrician and to stay up-to-date on any immunizations.	fast or slow,	During the first 12 months, you can promote healthy infant growth and development through frequent feedings, emotional bonding, a stimulating environment and addressing sibling rivalry. You should also address any household safety issues that could harm your baby.	1	parent bonding and PCI, safe envrionment,	0
150	Milestone	Web Site - Professional Organization	The Only 1-Month Developmental Milestones That Matter	https://www.fatherly.com/health-science/the-1-month-developmental-milestones-that-matter/	2019	0		0		0			0	1	0		28		1	They also begin to develop their senses, allowing them to become more aware of the sights, sounds, and smells of the world that surrounds them. Their nervous system is getting organized, so weird things may happen. That’s a sign that the brain is learning and everything is moving at a pretty good clip	fast or slow,		0		0
151	Milestone	Web Site - Professional Organization	Mom's Favorite Baby Milestones From the First Year	https://www.care.com/c/stories/3380/moms-favorite-baby-milestones-from-the-first/	2005	0		0		0			0	1	0		10		0				0		0
152	Milestone	Web Site - Professional Organization	Documenting Baby’s Milestones	https://www.iseeme.com/blog/blog/2017/12/15/documenting-babys-milestones/	N/A	0		0		0			0	1	0		94		0				0		0
153	Milestone	Web Site - Professional Organization	INFANT DEVELOPMENT - FIRST 12 MONTHS	http://www.babyyourbaby.org/infants/infant_dev.php	N/A	0		0		0			0	1	0		58		1	The first year in life is one of the most important stages in your child's development. From the moment they open their eyes they undergo dramatic physical and mental changes.	Early Experiences,	Take your child to the doctor for regular check ups to make sure he or she is growing strong and healthy. Early treatment of any problems is their best defense. The following chart shows you what your and your doctor should be watching for during your baby's first year.	1	concerns to PCP,	0
154	Development,Milestone	Web Site - Professional Organization	Parents Guide to Developmental Milestones	https://childmind.org/guide/developmental-milestones/#milestones-at-1-month	2022	0		0		0			0	1	1		378	12	0			Although each baby develops in her own individual way and at her own rate, failure to reach certain milestones may signal medical or developmental problems requiring special attention. If you notice any of the following warning signs in your infant at this age, discuss them with your pediatrician.	1	concerns to PCP,	0
155	Milestone	Web Site - Professional Organization	16 Important Developmental Milestones In Baby’s First Year	https://www.momjunction.com/articles/ways-understand-important-milestones-babys-life_0074502/	2022	0	Medically reviewed by Dr. Anuradha Bansal (MD (Pediatrics), MRCPCH), Written by Rohit Garoo (BSc)	1		0	Health Care Education, Human Services	Developmental Psychology	0	1	0		140		0				0		0
156	Development, Milestone	Web Site - Professional Organization	Child development stages	https://en.wikipedia.org/wiki/Child_development_stages	2022	0		0		0			0	1	1		219	2	0	Child development stages			0		0
157	Development,Milestone	Web Site - Commercial Entity	SENSORY DEVELOPMENT - YOUR BABY’S FIRST YEAR MILESTONES [INFOGRAPHIC]	https://infantino.com/blogs/the-baby-monitor/sensory-development-your-baby-s-first-year-milestones-infographic	2021	0		0		0			1	1	1	22	60	6	0				0		0
158	Milestone	Web Site - Professional Organization	Developmental milestones: birth to 1 year	https://babygooroo.com/articles/developmental-milestones-is-your-child-on-track	2021	0		0		0			0	1	0		218		0			Knowing when children typically achieve various milestones can help parents recognize developmental delays early on and seek appropriate care	1	concerns to PCP,	0
159	Milestone	App - Professional Organization	Baby Milestones Plus	https://drive.google.com/drive/u/0/folders/1-8kpdPV2fNxwcnL1nVKpo5YioBqPb8DV	N/A	0		0		0			0	1	1		244	6	0				0		0
160	Milestone	Web Site - Professional Organization	Baby development: Baby milestones for your child’s first year	https://www.goodtoknow.co.uk/family/baby-development-70220	2018	0		0		0			1	1	1	6	22	2	1	Birth position: Firstborns often learn to talk earlier as they're surrounded by adults, while subsequent babies may reach their physical milestones earlier because they have siblings to copy. Peronality: Some babies just sit there, taking it all in, while others won't stay in one place long enough to hear what you've got to say. Just like adults, babies all shine in different areas, depending on …	own pace,	Environment: Your child will learn according to the opportunities he or she gets, so make sure they enjoy a variety of activities and get to experience new surroundings.	1	opportunities for learning, safe envrionment,	0	Another thing to remember is that development doesn't happen at a steady pace, but in peaks and plateaus: your child may seem to make huge progress one week and then spend a while perfecting their new talent before moving on to something new. Also, premature babies may reach their milestones several months later than their peers.
161	Milestone	Web Site - Professional Organization	ONE GOOD REASON TO CELEBRATE THIS FIRST-YEAR MILESTONE…AND ONE GOOD REASON NOT TO GO CRAZY	https://www.highlights.com/parents/articles/one-good-reason-celebrate-first-year-milestone	2016	0		0		1	Parent, Other	editor for Parenting at Highlights	1	0	1	6		10	1	Either way, experts are likely to remind both sets of parents that there's variability within those dates and that each child follows his own unique developmental path.	own pace,		0		0
162	Milestone	Web Site - Professional Organization	Developmental Milestones	https://www.parentcenterhub.org/milestones/	2019	0		0		0			0	1	0		110		1	growth does tend to follow a certain sequence. Skills are expected to emerge at more or less the ages described below. Here are just a few of many milestones a typically developing child reaches in the first year of life and beyond.	specific order,		0		0
163	Milestone	Web Site - Professional Organization	Baby’s First Year: Developmental Milestones	https://hoagmedicalgroup.com/articles/babys-first-year-developmental-milestones/	2005	0	By Elaine Gan-Yong, MD, FAAP	1		0	Health Care Education		0	1	0		32		1	It’s important to remember that these milestones are approximate guidelines and that every child develops at their own pace. While babies tend to follow the same development pattern, no two babies go through these milestones at the exact same time.	own pace, fast or slow,	I always remind parents that it’s not about focusing on the completion of the milestone, but the progress their child is making. It is completely normal for babies to spend different amounts of time at each stage before moving on to the next. Slow down and enjoy each moment with your growing baby because the first year will go so quickly! If you are concerned that your child isn’t advancing or ma…	1	concerns to PCP,	0
164	Milestone	Web Site - Professional Organization	Speech and Language Milestones, Birth to 1 Year	https://www.uofmhealth.org/health-library/ue5081	2021	0	Medical Review:John Pope, MD, MPH - Pediatrics & Kathleen Romito, MD - Family Medicine & Louis Pellegrino, MD - Developmental Pediatrics	1		0	Health Care Education		0	1	0		48		0				0		0
165	Milestone	Web Site - Commercial Entity	Development Milestones in Your Baby’s First Year	https://www.bellamysorganic.com.au/blog/development-milestones-babys-first-year-0-12-months/	N/A	0		0		0			0	1	0		46		0	There are various potential causes of development delays. These can be medical in nature, such as issues arising from premature birth or genetic conditions. Others could be the result of physical injuries or accidents. Some developmental delays, such as speech difficulties, can be the result of hearing impairments or physical impediments in the throat, larynx, or nasal cavity.			0		0
166	Development,Milestone	Web Site - Professional Organization	Sensory Development Milestones in a Newborn's First 12 Months	https://www.augustahealth.com/health-focused/sensory-development-milestones-in-a-newborns-first-12-months	2017	0		0		0			0	1	0		32		0				0		0
167	Development,Milestone	Web Site - Professional Organization	Infant Vision: Birth to 24 Months of Age	https://www.aoa.org/patients-and-public/good-vision-throughout-life/childrens-vision/infant-vision-birth-to-24-months-of-age	N/A	0		0		0			0	1	0		24		1	Babies learn to see over a period of time, much like they learn to walk and talk. They are not born with all the visual abilties they need in life. The ability to focus their eyes, move them accurately, and use them together as a team must be learned. Also, they need to learn how to use the visual information the eyes send to their brain in order to understand the world around them and interact w…	specific order, always learning, domains interrelated,	Parents play an important role in helping to assure their child's eyes and vision can develop properly. Steps that any parent should take include: watching for signs of eye and vision problems, seeking professional eye care starting with the first comprehensive vision assessment at about 6 months of age, helping their child develop his or her vision by engaging in age-appropriate activities.	1	opportunities for learning, concerns to PCP,	0
168	Milestone	Web Site - Professional Organization	Baby milestones – when babies sit up, roll over and crawl	http://helpmegrowmn.org/HMG/HelpfulRes/Articles/BabyMilestones/index.html	N/A	0		0		0			1	1	0	6	18		1	Babies must be able to hold their heads up without support and have enough upper body strength before being able to sit up on their own. Babies often can hold their heads up around 2 months, and begin to push up with their arms while lying on their stomachs.	specific order,	Tummy time helps strengthen the upper body and neck muscles that your baby needs to sit up. Around 6 months, encourage sitting up by helping your baby to sit or support him/her with pillows to allow him/herher to look around.	1	opportunities for learning,	0
169	Milestone	Web Site - Government/ Government Agency	Speech and Language Developmental Milestones	https://www.nidcd.nih.gov/health/speech-and-language	2017	0		0		0			0	1	0		52		1	The first 3 years of life, when the brain is developing and maturing, is the most intensive period for acquiring speech and language skills. These skills develop best in a world that is rich with sounds, sights, and consistent exposure to the speech and language of others. There appear to be critical periods for speech and language development in infants and young children when the brain is best …	Early Experiences,	The first signs of communication occur when an infant learns that a cry will bring food, comfort, and companionship. Newborns also begin to recognize important sounds in their environment, such as the voice of their mother or primary caretaker. As they grow, babies begin to sort out the speech sounds that compose the words of their language.	1	Talking reading singing,	0
170	Milestone	Web Site - Professional Organization	Baby milestones: gross motor development	https://www.childandfamilyblog.com/early-childhood-development/baby-development-milestones/	N/A	0		1		1	Human Services	Professor of Developmental and Biological Psychology,	0	1	0		82		0				0		0
171	Milestone	Web Site - Popular Press	Can Your Baby Wield a Machete?	https://slate.com/human-interest/2010/05/developmental-milestones-for-babies-are-meaningless.html	2010	0		0	author of Baby Meets World and parent	1	Parent	Author	0	1	0		4		1	"Babies take different routes to the same destination. There’s no right way to learn to walk, for example, and there’s scarcely even a right time."; "The most interesting research on motor development in recent years treats it as the product of many different systems: the infant’s environment, personality, nervous system, and personal physical limitations. When all these variables interact, you g…	own pace, domains interrelated,		0		0
172	Milestone	Web Site - Professional Organization	Developmental Milestones	https://www.chop.edu/conditions-diseases/developmental-milestones	N/A	0		0		0			1	1	1	76	110	46	1	"Developmental milestones are physical or behavioral signs of development of infants and children. Rolling over, crawling, walking and talking are considered developmental milestones and provide important information regarding your child's early development"; "Children develop at their own pace, so don't be alarmed if your child takes a slightly different course. Some children may skip over miles…	own pace,	if you have any developmental concerns at any point, you should contact your pediatrician immediately; "what you can do to encourage your baby's development"	1	concerns to PCP,	0
173	Development,Milestone	Web Site - Professional Organization	Birth to One Year	https://www.asha.org/public/speech/development/01/	N/A	0		0		0			1	1	0	16	54		1	Children develop at their own rate. Your child might not have all skills until the end of the age range.	own pace,	Check if your child can hear. See if she turns to noises or looks at you when you talk. Pay attention to ear problems and infections, and see your doctor.	1	concerns to PCP,	0
174	Milestone	Web Site - Professional Organization	Baby Milestones: Month-By-Month	https://www.deltachildren.com/blogs/the-play-yard/baby-milestones-chart	2018	0		0		0			0	1	0		134		0			you shouldn’t compare your baby’s development to others, or even to charts, as babies develop at different rates. If you’re concerned that your child hasn’t hit typical milestones for babies during their first year, talk to your pediatrician to ensure healthy development and growth.	1	concerns to PCP,	0
175	Milestone	Web Site - Professional Organization	Baby Milestones Chart: Is Your Baby on Track?	https://www.mamanatural.com/baby-milestones-chart/	2019	0		0	Genevieve Howland is a childbirth educator and breastfeeding advocate. She is the bestselling author of The Mama Natural Week-by-Week Guide to Pregnancy and Childbirth and creator of the Mama Natural Birth Course. A mother of three, graduate of the University of Colorado, and YouTuber with over 85,000,000 views, she helps mothers and moms-to-be lead healthier and more natural lives.	1	Parent, Other	childbirth educator and breastfeeding advocate, writer	0	1	0		87		1	One in six children will have a developmental delay, but that doesn’t mean your baby will face long-term issues. Missing a few monthly milestones is not cause for panic. There are many factors that influence when infant milestones happen. In most cases, your baby just needs a little extra time.	own pace,	If your doctor gives the all clear, but you still have concerns, get a second opinion. Remember: You know your child’s movements and patterns best. Even if it is just a nagging feeling, never be afraid to talk to your healthcare provider about any concerns.	1	concerns to PCP,	0
176	Milestone	Web Site - Professional Organization	Baby Development Milestones: 1-6 Months	https://www.healthxchange.sg/children/baby-0-24-months/baby-development-milestones-1-6-months	N/A	0		0	The Department of Neonatology, KK Women's and Children's Hospital (KKH)	0			0	1	0		98		1	While all babies share the same development milestones, each baby will have their own growth and development pace because of various hereditary and environmental factors. Don’t worry if your baby seems a bit slower.	own pace,	Ensuring your baby’s development starts in the womb, with proper antenatal check-up and screening to monitor the well-being of the foetus.	0		0
177	Milestone	Web Site - Commercial Entity	Baby’s 1st Year Milestones	https://www.summerinfant.com/SummerInfant/media/SI_ContentImages/Product%20Manuals/DrGreeneMilestoneChart_V3.pdf	N/A	0	By Dr. Alan Greene, MD, FAAP	1		0	Health Care Education		0	1	0		192		1	But, let me emphasize something incredibly important: there is a very wide range of “normal.” Progressing slower than what’s outlined on milestone charts is not an indication of abnormalities or decreased intellect and progressing faster is not an indication of any type of physical superiority	own pace, Early Experiences,	Of course, if you ever have any concern, discuss with your pediatrician. And, if by age 8 – 12 months your baby displays any of the following indicators of potential developmental delay outlined by the AAP, alert your pediatrician; The most important thing you can do (besides providing healthy food, promoting sound sleep, and creating a safe environment) is to spend quality time with your baby - …	1	parent bonding and PCI, safe envrionment, Talking reading singing, concerns to PCP,	0
178	Milestone	Web Site - Popular Press	Developmental milestones: the first year	http://www.stuff.co.nz/life-style/parenting/baby/development/7088440/Developmental-milestones-the-first-year	2012	0		0		0			0	1	0		110		1	It is important to realise that a baby's developmental progress does vary greatly. Some children may miss out on developmental milestones all together - such as crawling. The following information is not intended to be a checklist, but it provides a general outline of the usual developmental progress for the age of your child. Babies and infants will develop at differing levels depending on facto…	own pace,		0		0
179	Development,Milestone	Web Site - Professional Organization	Cognitive Developmental Milestones	https://www.verywellmind.com/cognitive-developmental-milestones-2795109	2021	0		1	Kendra Cherry, MS, is an author, educational consultant, and speaker focused on helping students learn about psychology.	1	Human Services	Author, educational consultant, LCSW, is a psychotherapist	1	1	0	4	52		1	Prior to the 20th-century, children were often seen simply as miniature versions of adults. It wasn't until psychologists like Jean Piaget proposed that children actually think differently than adults do and that people began to view childhood and adolescence as a unique period of growth and development. Adults often dismissed the remarkable intellectual skills of infants and very young children,…	Early Experiences, always learning,	For many parents, encouraging children's intellectual development is a point of major concern. Fortunately, children are eager to learn right from the very beginning. While education will soon become an enormous part of a growing child's life, those earliest years are mostly influenced by close family relationships, particularly those with parents and other caregivers. This means that parents are…	1	opportunities for learning, parent bonding and PCI,	0
180	Milestone	Web Site - Professional Organization	Gross Motor Milestones for your Babies’ First Year	https://nspt4kids.com/parenting/gross-motor-milestones-for-your-babies-first-year/	N/A	0		0		0			0	1	0		22		1	Growth and development occurs differently in every child and there is a window where milestones traditionally occur; Every month brings new milestones, both for fine motor, gross motor and speech production	specific order, own pace,	Knowing what is expected in each month can help you prepare as a parent, and even help you facilitate your baby standingbabies’ milestones.	1	opportunities for learning,	0
181	Milestone	Web Site - Professional Organization	Developmental Milestones: 1 Month; Developmental Milestones: 3 Months; Developmental Milestones: 7 Months; Developmental Milestones: 12 Months; Movement Milestones: Birth to 3 Months; Movement: 4 to 7 Months; Cognitive Development: 4 to 7 Months; Language Development: 4 to 7 Months; Movement: 8 to 12 Months; Cognitive Development: 8 to 12 Months	https://healthychildren.org/English/ages-stages/baby/Pages/Developmental-Milestones-1-Month.aspx	2009-2021	0	Courtney Wusthoff, MD, FAAP,	1	Courtney Wusthoff, MD, FAAP, an Associate Professor of Neurology at Stanford University and the Neurology Director for the Neonatal Neuro-ICU at Lucile Packard Children's Hospital. She specializes in the neurological care of newborns and infants, and of children with epilepsy. Within the American Academy of Pediatrics, she is a member of the Section on Neurology.	1	Health Care Education		1	1	1	24	386	34	1	Each baby develops in her own individual way and at her own rate; Because each baby develops in his own particular manner, it’s impossible to tell exactly when or how your child will perfect a given skill. The developmental milestones listed in this book will give you a general idea of the changes you can expect, but don’t be alarmed if your own baby’s development takes a slightly different cours…	own pace, always learning, responsive communication, fast or slow,	First she’ll learn to raise her head and hold it up while lying on her stomach. You can encourage this by placing her on her stomach and extending her arms forward; then hold a rattle or other attractive toy in front of her to get her attention and coax her to hold her head up and look at you.; "Before long, she’ll begin dropping things intentionally to see you pick them up. As annoying as this m…	1	opportunities for learning, Talking reading singing,	0
191	Milestone	Web Site - Professional Organization	Developmental milestones for newborns	https://www.kidspot.com.au/baby/newborn/newborn-development/developmental-milestones-for-newborns/news-story/b6ec8cec804233ac3d0abda53f90bae0	2017	0		0		0			1	1	1	34	48	4	0				0		0
192	Milestone	Web Site - Professional Organization	Baby milestones: the first 12 months from newborn to toddler	https://sg.theasianparent.com/baby-milestones-development	N/A	0		0		0			0	1	0		98		0				0		0
193	Milestone	App - Individual	Kinedu		N/A	9.99		0		0			1	1	1	138	440	35	0				0		0
194	Milestone	Web Site - Professional Organization	BABY CHECKUPS COUNTTM ! WATCH TO FIND OUT WHY.	https://www.babycheckupscount.com/	2021	0		0		0			0	1	0		80		1	"Each baby is different and may achieve milestones at a different pace."	own pace,		0		0
195	Development,Milestone	Web Site - Professional Organization	Milestone chart: one to six months; Milestone chart: seven to 12 months	https://www.babycenter.com.au/a6476/milestone-chart-one-to-six-months; https://www.babycenter.com.au/a6477/milestone-chart-seven-to-12-months	N/A	0		1	Megan Rive is a communication, content strategy and project delivery specialist. She was a BabyCenter Australia editor for six years, and is on the board of the Nappy Collective Inc. The community-led not-for-profit makes nappies available to disadvantaged families across Australia. She has an MSc in Science Communication from The Australian National University. senior lecturer in nursing at West…	1	Health Care Education, Other	MSc Science Communication	0	1	0		212		0				0		0
197	Milestone	Web Site - Popular Press	Baby's first steps and 8 other milestones	https://www.parent24.com/Baby/Development/9-top-milestones-in-the-first-year-20160714	2018	0	Occupational Therapist	1		0	Health Care Education		1	1	1	24	36	6	1	During his first 12 months, each new skill leads to the next as your baby barrels toward toddlerhood. Each milestone also acts as a marker to show you how he is growing up.	specific order,	While each smile, gurgle or step is eagerly awaited, no two children are alike and so no two children will develop in the same way or at the same time. It is important to keep in mind that your baby has his or her own unique strengths and talents. Don't push your baby to master a skill and then rapidly move on to the next target. Babies need time to master and enjoy the skill they have acquired s…	1	opportunities for learning,	0
198	Milestone	Web Site - Popular Press	In-Depth List of All the Baby Milestones Reached the First Year	https://www.positive-parenting-ally.com/baby-milestones.html	N/A	0		0		0			0	1	1		228	4	0			Striving to always, and as quickly as possible, meet your baby's physical as well as emotional needs will create the simple subconscious belief in your child that the world is good place.	1	parent bonding and PCI,	0
199	Development,Milestone	Book - Individual	Your Baby's First Year: Month by month Developmental Milestones	https://www.amazon.com/gp/product/B07M7FZGVW/ref=x_gr_w_bb_glide_sout?ie=UTF8&tag=x_gr_w_bb_glide_sout-20&linkCode=as2&camp=1789&creative=9325&creativeASIN=B07M7FZGVW&SubscriptionId=1MGPYB6YW3HWK55XCGG2	2019	5.38	MSc	1		0	Human Services	A qualified Psychologist with a Master's degree in Clinical Child Psychology, Seffie is the founder of infant/early development-focused enterprises aidie London and The Aidie Trust	1	1	1	114	106	38	1	When she discovers a new sound, she'll practise it over and over again until she's perfect it. Without realising, it your baby repeating sounds is actually forming neural connections in her brain. You can support her by repeating sounds back to her and encouraging her to repeat herself and copy you	learn through Repetition, responsive communication,	To encourage her developing physical abilities, sit baby up and place her legs in a v-shape to stabilise her. Surround her with cushions and stay nearby in case she falls.	1	opportunities for learning, safe envrionment, Talking reading singing,	1	When your newborn is alert and not sleepy, she'll probably show you signs that she wants to interact. Respnd by playing gentle games or talking to her	Awake and Alert, overstimulated, babys lead,
200	Milestone	Web Site - Professional Organization	Cognitive Development in 0-2 Year Olds	https://www.scholastic.com/parents/family-life/creativity-and-critical-thinking/development-milestones/cognitive-development-0-2-year-olds.html	N/A	0	Michelle Anthony, PhD	1		0	Unspecified	Unspecified	1	1	1	6	6	8	1	From birth until they turn 2, children are in what famous developmental researcher Jean Piaget calls the sensorimotor period. During this time, children use their senses and actions to learn and grow. This period begins with basic reflexes and advances through a series of “stages” to complex sensory and motor skills, and early symbolic thought.	specific order, play using their senses,	While playing hands-on with your baby is always the best way to connect, sharing games or images online allows you to diversify the kinds of interactions you and your baby share. Be sure to talk to your child and engage her with meaningful questions or playful interactions as you and your baby explore baby-focused cognitive games that encourage sorting, peekaboo, and cause and effect understandin…	1	opportunities for learning, parent bonding and PCI, Talking reading singing,	0
201	Development, Milestone	Web Site - Professional Organization	Your Child’s Development: 1 Year (12 Months)	https://kidshealth.org/en/parents/development-12mos.html	2022	0	Anne M. Meduri, MD	1		0	Health Care Education		0	1	1		10	2	0				0		0
202	Development, Milestone, Survey	Web Site - Professional Organization	Milestones of your baby’s first year: photos	https://www.babycenter.in/l1043527/milestones-of-your-babys-first-year-photos	2022	0		0		0			1	1	1	2	31	2	0				0		0
203	Milestone	Web Site - Government/ Government Agency	Your Baby at 2 Months; Ages & Stages 4 months; Your Baby at 6 Months; Ages & Stages 9 months; Ages & Stages 1 year	https://www.firstthingsfirst.org/wp-content/uploads/2018/09/2018-CDC-Milestone-Tracker-English-2-months.pdf	2018	0		0		0			1	1	1	94	182	32	1	How your child plays, learns, speaks, acts and moves offers important clues about your child’s development.		"You can help your baby learn and grow. Talk, read, sing and play together every day"; Begin to help your baby get into a routine, such as sleeping at night more than in the day, and have regular schedules; "Check the milestones your child has reached by the end of 4 months. Take this with you and talk with your child’s doctor at every visit about the milestones your child has reached and what to…	1	opportunities for learning, safe envrionment, Talking reading singing, concerns to PCP,	0
208	Milestone	Web Site - Professional Organization	Your Growing Baby	https://www.healthhub.sg/live-healthy/9/guide_your_growing_baby	2021	0		0		0			1	1	1	20	42	10	1	Growth and development within the first year of life is very rapid. Besides physical growth, your baby is learning all sorts of new skills during this stage ; Each baby is unique and his development may vary from others. So do not worry if your baby differs by a few months. What is important is that these milestones occur in a particular order. ; You may be surprised to hear this but not all babi…	specific order, own pace, always learning, fast or slow,	As parents, it is important that you are aware of these changes or acquired skills so that you can provide activities and a safe environment for your baby's brain development ; Knowing the stages of development of your baby will help you react and respond in the right way, so as to help hone your child's development and skills ; If you are concerned about the development of your child, talk about…	1	opportunities for learning, safe envrionment, concerns to PCP,	0
209	Development,Milestone	Web Site - Popular Press	Baby's developmental milestones for the first year	https://www.today.com/parents/babys-developmental-milestones-first-year-I127191	N/A	0		0		0			0	1	0		228		0			During the first year of life your baby responds best to a warm, loving environment. Holding your baby and responding to her cries are essential in building a strong, healthy bond. Remember, you can't "spoil" a baby.	1	parent bonding and PCI,	0
210	Milestone	Web Site - Popular Press	Developmental Milestones for Babies	https://www.youtube.com/watch?v=oI9WE1spJFs	2014	0		1		1	Health Care Education		0	1	0		18		1	"developmental milestones are different skills that a baby will develop at different ages as they develop" ; "milestones and development will vary from one child to another"	own pace,	"sometimes when babies seem to be struggling to reach a certain skillset, it may be time to call for some additional help"; "delays in motor or speech development, we'll reccomend that they go see a physical or speech therapist"	1	concerns to PCP,	0
211	Milestone	Web Site - Professional Organization	Speech and language milestones: baby’s first year	https://www.bundoo.com/articles/speech-and-language-milestones-babys-first-year/	2021	0	MS, CCC-SLP	1	pediatric speech-language pathologist	1	Health Care Education		0	1	0		50		1	Keep in mind that as with all milestones, these are general guidelines for typical development. All children are unique and develop speech and language in their own way.	own pace,		0		0
212	Milestone	Web Site - Professional Organization	Milestones for Your 3 to 6 Month Old Baby; When Do Babies Start Walking?	https://www.babypillars.com/blog/milestones-for-your-3-to-6-month-old-baby/	2015	0		0		0			1	1	1	16	32	10	1	"Walking is a more complicated and advanced milestone, with several requirements for muscle development and coordination." ; "Along with this, their muscles need to be developed enough where their legs can support them, they are able to establish and keep their balance, and they have the upper body strength to get up onto their feet in the first place. Walking is a complicated motion, one that is…	specific order,	You can do the same thing; just lay your baby on his stomach and on a level surface. Encourage him to lift his head and chest through stimulation, and while you can show him what do it, let him try it without helping him. ; Between Tummy Time and holding them upright to cuddle, my kids caught on pretty quickly when it came to keeping their head and neck stable.; In order to get to that point, and…	1	opportunities for learning, concerns to PCP,	0
214	Milestone	Web Site - Professional Organization	Your child’s development: What to expect	https://www.caringforkids.cps.ca/handouts/your_childs_development	2021	0		0		0			0	1	0		122		0	Children develop skills in several different areas: Gross motor: These are movements using the body’s large muscles and include sitting, standing, walking, running, keeping balance, and changing positions. Fine motor: These skills use the small muscles in the hands and fingers. Fine motor skills include using hands to eat, draw, dress, play, and write. They develop over time and also involve hand…		If you’re worried that they are not reaching some milestones, you can mention it to your doctor.	1	concerns to PCP,	0
215	Milestone	Book - Individual	Baby Milestones: Stimulate Development from 0-3 Years	https://www.amazon.co.uk/Baby-Milestones-Stimulate-Development-Years/dp/0600613542	2006	0.01	Dr. Carol Cooper MA, MB, BChir, MRCP	1		1	Health Care Education		1	1	1	38	520	90	1	Babies learn through play, manipulating their surroundings in ever more skilled ways; nature vs. nurture	learn through play, learn from enviornment,	As a parent you are your baby's first line of protection against the world. You are also his first plaything, his first teacher, his first love... You are on every level his inspiration, his model... parents can encourage safe exploration within safe surroundings, helping their baby to notice things, to find out how things work, and to gradually make sense of the world.	1	opportunities for learning, parent bonding and PCI, safe envrionment,	1	The stimulation a baby gets must match his needs. there are sensitive periods when he is most ready to acquire certain skills; There is a such thing as too many toys. Your baby can get bored or overwhelmed in the midst of plenty, and may cry if she is surrounded by lots of playthings. Sometimes all she wants is a quiet cuddle from you.	overstimulated, babys lead,
216	Milestone	Web Site - Professional Organization	Birth to 3 Months: Your Baby’s Development; 3–6 Months: Your Baby’s Development; 6–9 Months: Your Baby’s Development; 9–12 Months: Your Baby’s Development	https://www.zerotothree.org/resources/80-birth-to-3-months-your-baby-s-development	2016	0	Authors: Rebecca Parlakian and Claire Lerner, LCSW, ZERO TO THREE	1		0	Human Services	Social Work	1	1	1	48	90	24	1	The first 3 months are all about babies learning to feel comfortable, safe, and secure in the world; As you use this resource, remember that your child may develop skills faster or slower than indicated here and still be growing just fine. ; Your family’s cultural beliefs and values are also important factors that shape your child’s development	own pace, responsive communication, learn from enviornment,	Learn and respond to your baby’s signals.; Comfort your baby when he cries; Place your baby in different positions to help her develop new skills like rolling, creeping, and crawling. ; When parents and caregivers notice and respond sensitively to their babies’ signals, they are helping their children develop stronger thinking and social-emotional skills.; Give your baby’s developmentally appropr…	1	opportunities for learning, parent bonding and PCI,	1	Respond to your baby’s signals. When her eyes are bright and she is awake and alert, it is time to play. Slow things down when she cries, turns away, or arches her back.When you shake my rattle, I may smile and move my arms and legs to let you know I want to keep playing	Awake and Alert, overstimulated, babys lead,
220	Development,Milestone	Web Site - Professional Organization	Your 12-week-old baby’s development	https://www.motherandbaby.co.uk/baby-and-toddler/baby/baby-development-and-milestones/12-week-old-baby-development	N/A	0		0		0			1	1	1	4	20	6	1	Sleep patterns are different for every baby but there are certain things you can expect between three months and twelve-months-old. Their daytime naps will vary in length, but they will usually have at least three. It’s important for babies to continue to nap during the day; not only will this help your baby sleep well at night but it’s also good for their brain development.;		" If you're having ongoing issues with sleep, there are certain tips and tricks you can use to get them snoozing. Try boosting your baby's sleep hormone naturally to help regulate their body clock with the help of sunlight." ; Don’t worry too much about how much or how many times your feeding, as long as your baby is a healthy weight. If you’re worried about your baby’s weight or feeding patterns…	0		0
221	Milestone	Web Site - Government/ Government Agency	Developmental milestones	https://www.nhp.gov.in/developmental-milestones_pg	2019	0		0		0			0	1	0		148		1	But the time and pace for these developmental stages may vary child to child. Some babies might reach a stage earlier than expected but may not necessarily be reaching another stage at the same pace or age	own pace,		0		0
222	Milestone	Web Site - Commercial Entity	Your 1-12 Month-Old Baby	https://similac.com/baby-development/1-month-old-baby-tips-advice	N/A	0		0		0			1	1	1	58	192	34	1	In his first month, your baby sees best within 12 inches of his face. He is staring a lot, and likes bold shapes and high-contrast objects, such as a black and white bull's-eye. He loves looking at faces, especially your expressions, and might imitate them right away.;Good nutrition, including appropriate amounts of both macronutrients (carbohydrates, lipids, and protein) and micronutrients (vita…	own pace, Early Experiences,	Feed him frequently, in small amounts. A newborn is not very hungry the first two or three days. Learn to recognize "ready to feed" signals, including lip smacking, tongue movement, and eye fluttering. Crying is a late signal for hunger. Talk softly to your baby during feedings to help him recognize your voice and associate it with nourishment; to help him along, put a rattle in his hand and gent…	1	opportunities for learning, parent bonding and PCI, Talking reading singing, concerns to PCP,	1	Watch her closely and you will learn how much or how little stimulation she can handle, and when she is ready for talking, feeding, singing, or playing. Her actions will say it all.	overstimulated, babys lead,
234	Milestone	Web Site - Popular Press	The Only 3 Milestones That Matter in Baby's First Month	https://www.yahoo.com/lifestyle/only-3-milestones-matter-babys-015127747.html	2019	0		0		0			0	1	0		10		1	Developmental milestones are not fixed points that all kids hit. They’re more like waypoints marking the course of typical development. Some babies may reach certain them early while reaching others late. Some babies may skip certain milestones altogether.; Don’t stress if your baby has a floppy neck, twitchy movements or scratches themselves. It’s all normal as they develop control over their bo…	own pace,		0		0
235	Milestone	Web Site - Popular Press	Baby Milestones: When to Worry About Late Bloomers	https://www.parenting.com/activities/baby/baby-development-milestones/	N/A	0		0		0			0	1	0		48		1	It’s a unique combination of factors that motivates babies to reach milestones on time—or not			0		0
236	Milestone	Web Site - Professional Organization	Your infant's vision development: What to know	https://www.allaboutvision.com/parents/infants.htm	2022	0	OD	1	"30 years of experience as an eye care provider, health educator and consultant to the eyewear"	1	Health Care Education		1	1	1	4	30	2	0	how you care for your own body during your pregnancy is extremely important for the development of your baby's body and mind, including the eyes and the vision centers in the brain; At birth, your baby sees only in black and white and shades of gray. Nerve cells in their retina and brain that control vision are not fully developed. Also, a newborn infant's eyes don't have the ability to focus on …		To help stimulate your infant's vision, decorate their room with bright, cheerful colors. Include artwork and furnishings with contrasting colors and shapes. Also hang a brightly colored mobile above or near their crib. Make sure it has a variety of colors and shapes.	1	safe envrionment,	0
237	Milestone	Web Site - Professional Organization	Infant Development: Important Milestones During a Baby's First Year	https://www.kidsinthehouse.com/baby/infant-development-and-health/infant-development-important-milestones-during-a-babys-first-year	2014	0		0		0			0	1	0		22		1	it’s less about what they are doing with each individual milestone and more about what they are doing in four different categories, which includes social, speech, and fine and gross motor skills	domains interrelated,		0		0
238	Milestone	Web Site - Individual	Baby's Development Milestones - First Year	https://ezinearticles.com/?Babys-Development-Milestones---First-Year&id=9855304	2017	0		0		0			0	1	0		36		1	Developmental milestones are easily identifiable age specific skills that a baby can perform, such as rolling over, sitting up, walking etc.. Development milestones are just a guideline. Babies most likely follow the same progression through these milestones. No two babies are exactly alike and each baby grows at his/her own pace. Thus, mothers should not compare their child's growth with that of…	own pace,		0		0
239	Milestone	Web Site - Professional Organization	All you MUST know about your baby's developmental milestones in the first year!	https://www.theindusparent.com/must-know-babys-developmental-milestones-first-year	N/A	0		0		0			0	1	0		44		1	During the baby’s first year, remarkable changes occur in the physical or motor, social or emotional, language and the cognitive domains of development. These milestones can be categorised as the ‘benchmarks of development’ or the ‘stages of achievement, and are easily identifiable by observation ; Ill or premature infants may exhibit delayed acquisition of physical growth and developmental skill…	own pace, fast or slow,		0		0
240	Milestone	Web Site - Professional Organization	Baby Milestones – What to Expect the First Year	https://twinmom.com/baby-milestones-first-year/	2018	0		0		0			0	1	1		136	4	0				0		0
241	Milestone	Web Site - Professional Organization	Developmental milestones — What to expect during the first year of your child’s life	https://www.thehealthsite.com/parenting/developmental-milestones-0-to-1-year-f915-325955/	2016	0	verified by Dr Mona P Gajre, Professor of Paediatrics & Head – Learning Disability Clinic, Lokmanya Tilak General Hospital, Mumbai; Dr Anitha Anchan is a qualified dentist, health conscious mom and wife with a very curious mind. When she is not in her kitchen trying to invent ingenious healthy recipes for her family, she is usually busy 'googling' and reading about the latest developments in heal…	1	verified by Dr Mona P Gajre, Professor of Paediatrics & Head – Learning Disability Clinic, Lokmanya Tilak General Hospital, Mumbai; Dr Anitha Anchan is a qualified dentist, health conscious mom and wife with a very curious mind. When she is not in her kitchen trying to invent ingenious healthy recipes for her family, she is usually busy 'googling' and reading about the latest developments in heal…	1	Parent, Health Care Education		0	1	0		104		1	Development of your baby during the first year of life depends on various parameters like physical development, acquiring language skills, cognitive behaviour, social skills, emotional and behavioural changes.	domains interrelated,	Never offer water to your baby below six months of age. It can lead to dilution of sodium concentration in the body, unsettling the electrolyte balance and causing tissues to swell ; Do not allow sleeping with the bottle. Breastfeeding the baby to sleep is no different either. Allowing baby to sleep with a bottle could lead to milk pooling and erode the enamel of the newly formed teeth, leading t…	0		0
242	Milestone	Web Site - Professional Organization	Baby Milestones: What to Expect on Your Baby Development Stages for The First 12 Months	https://babydotdot.com/baby-development-milestones/	2018	0		0		0			0	1	0		96		1	Developmental milestones (and child milestones) are what average babies develop or learn to do by a specific time. Most newborn babies have a documented 12-month milestone guide to help parents know if their child is lagging behind. However, this is also an excellent time to remind you that not all babies are alike. You might experience taking care of a child that develops and learns new skills a…	own pace,	You can update your doctor about your baby’s developmental milestones and expect professional advice from them moving forward. After all, baby health is very important ; This is all well and normal but remember that there are more things to teach your kid than moving. Don’t forget to continue honing his curiosity, social skills, and speech. ; Knowing what babies can do as they grow up during thei…	1	opportunities for learning, concerns to PCP,	0
243	Milestone	Web Site - Professional Organization	BRAVE NEW WORLD	http://pregnancyandbaby.com/baby/articles/967405/guide-to-your-babys-firsts	2005	0		0		0			1	1	1	8	20	2	0			You can strengthen his "roll-over" muscles by offering plenty of tummy time.	1	opportunities for learning,	1	Once your baby sits unassisted, you can play together more easily with blocks and other baby toys.	this milestone then,
244	Milestone	Web Site - Commercial Entity	10 Baby Milestones for the First Year	https://themommydigest.com/10-baby-milestones-first-year/	2017	0		0		0			0	1	0		22		0				0		0
245	Milestone	Web Site - Popular Press	BABY'S MILESTONES	http://www.parentguidenews.com/Articles/BabysMilestones	N/A	0		0		0			1	1	1	6	134	16	0				0		0
246	Development, Milestone, Survey	Book - Professional Organization	Your Baby's First Year: Fifth Edition	https://www.amazon.com/Your-Babys-First-Year-Fifth/dp/0593158288/ref=d_pd_sbs_sccl_2_1/130-1726550-4218315?pd_rd_w=KAU4m&content-id=amzn1.sym.6ccaee5d-096a-4b4f-a8ba-f4ae5ec130a1&pf_rd_p=6ccaee5d-096a-4b4f-a8ba-f4ae5ec130a1&pf_rd_r=K3A2GVWC7J3CBETYZ0K6&pd_rd_wg=umPLh&pd_rd_r=b751160f-2aa3-43d2-b8ef-7501b82fc0a7&pd_rd_i=0593158288&psc=1	2020	9	M.D, M.S, F.A.A.P, Editor-in-chief	1	Steven P. Sheloc, M.D, M.S, F.A.A.P, Editor-in-chief	1	Health Care Education		1	1	1	41	121	34	1	"Growth and development - most babies grow very rapidly after regaining their birth weight, especially during growth spurts, which occur around seven to ten days and then again between three and six weeks."	Early Experiences, fast or slow,	"Studies have shown that children need certain de ments in the early stages of life to grow and developt their full potential: - A child needs to feel special, loved, and valued - She needs to feel safe..." "What does this mean for you as a parent? It means that you and the environment you create for your baby will influence that way she deals with her emotions, interacts with people, thinks and …	1	parent bonding and PCI, safe envrionment,	0
247	Milestone	Book - Individual	Dad's Guide to Baby's First Year For Dummies	https://www.amazon.com/Dads-Guide-Babys-First-Dummies/dp/1119275792/ref=sr_1_1?keywords=9781119275794&linkCode=qs&qid=1574185373&s=books&sr=1-1	2016	15.61	RN	1			Health Care Education		1	1	1	62	52	56	1	- Describes brain development (synapses) pg 155	learn through play,	pg 191: you help her move and learn just by being there and having time to play. She watches you sitting, getting up, and walking, and wants to copy what you're doing.	1	opportunities for learning,	0
248	Survey, Development, Milestone	Book - Individual	Baby's First Year Milestones	https://www.amazon.com/Babys-First-Year-Milestones-Development/dp/1641520515	2018	11.59	MEd	1		1	Early Childhood Education		1	1	1	310	480	88	0				0		1	Page 39: gain consent first, slow down your movements, respect your child's concentration, hang back, learn step-by-step	babys lead,
249	Survey, Development, Milestone	Book - Commercial Entity	What to Expect the First Year: 3rd Edition	https://www.amazon.com/What-Expect-First-Heidi-Murkoff/dp/0761181504/ref=tmm_pap_swatch_0?_encoding=UTF8&qid=1575909446&sr=1-1	2005	9.97		0		0			1	1	1	118	508	272	0			there was information about this	0		0
252	Survey, Development, Milestone	Web Site - Professional Organization	Healthy Children: Baby	https://www.healthychildren.org/english/ages-stages/baby/Pages/default.aspx	2005	0		0		0			0	1	0		90		0				0		0
253	Survey, Development, Milestone	Web Site - Professional Organization	2,3,4 5 Month Old Milestones, 7 Month Old Milestones, Games for Your 4-6 Month Old, Baby's Hand and Finger Skills, Crawling, 9 Month Old Milestones, 12 Month Old Milestones, Baby's Language Development, Games for Your 10 to 12 Month Old, Your Learning Baby: 8 to 12 months, Brain Development with Dad	https://www.text4baby.org/learn/newmom/milestones-month-2	2017	0		0		0			0	1	1		41	13	1	Babies develop in their own way, so it's impossible to know when your baby will achieve each milestone.	own pace, responsive communication,	If you notice your baby can't do any of the following talk with your baby's health care provider: Doesn't seem to respond to loud sounds Doesn't notice her hands by two months Doesn't smile at the sound of your voice by two months Doesn't follow moving objects with her eyes by two to three months Does't grasp and hold objects by three months Doesn't smile at people by three months Cannot support …	1	concerns to PCP,	0
254	Development, Milestone, Survey	Web Site - Government/ Government Agency	CDC Developmental Milestones	https://www.cdc.gov/ncbddd/actearly/milestones/index.html	2022			0		0			1	1	1	43	88	21	0			Don’t wait. If your child is not meeting one or more milestones, has lost skills he or she once had, or you have other concerns, act early. Talk with your child’s doctor, share your concerns, and ask about developmental screening	1	concerns to PCP,	0	Place toys on the ground or on a play mat a little out of reach and encourage your baby to crawl, scoot, or roll to get them. Celebrate when she reaches them.
257	Survey, Development, Milestone	App - Professional Organization	Baby + 0-4 mo; 5-8 month play activites; Baby + 9-12 months; Baby + Milestones	Baby Development & Tracker App	2017	0		0		0			1	1	1	60	290	52	1	When your baby's need to closeness are met, baby can focus energy on growth and development feeling confident; By their due date, all of your baby's senses will be developed and will continue to refine as they gro: Vision, hearing, smell, touch, taste; Placed on their stomachs, babies will develop strong neck, shoulder, core and head muscles - all prerequisites for milestones such as rolling, sit…	own pace, Early Experiences, learn through play, learn through exploring objects, learn through Repetition, responsive communication,	You can help hearing develop by talking or singing to your baby often or playing quiet music; Babies thrive with positive touch so spend time skin-to-skin with your newborn; Reasearch shows that even premature babies benefit - they have better heart and respiratory rates, better sleep and feeding patterns, and better weight gain when they get to hear their mom's voice;By pointing, commenting, and…	1	opportunities for learning, parent bonding and PCI, safe envrionment, Talking reading singing,	1	How and when to start with tummy time: Work your way up to three 5-minute sessions each day for your 2 month old. When your baby is able to roll themselves from tummy to back to tummy again (usually around 6 months), you don't need to set aside specific tummy time; Always watch for signs of overstimulation - such as turning away, staring into space, rubbing their eyes or putting their fists in fr…	this milestone then, overstimulated,
258	Survey, Development, Milestone, Play	App - Professional Organization	Baby Center App- Newborn, 1mo, 2mo, 3mo, 4mo, 5mo, 6mo, 7mo, 8mo, 9mo, 10mo, 11mo	https://drive.google.com/drive/u/1/folders/1-Ns_nlkCfmyCxvjflHuw8DnWZYTV1mPy	N/A	0	medically reviewed by Suzanne Dixon, M.D., MPH, pediatrician AAP.	1	pediatrician AAP.	1	Health Care Education		1	1	1	104	272	100	1	All babies are unique and meet milestones at their own pace. Developmental guidelines simply show what your baby has the potential to accomplish – if not right now, then soon. If your baby was premature, keep in mind that kids born early usually need a bit more time to meet their milestones.If you have any questions at all about your baby's development, ask your healthcare provider. Hearing plays…	own pace, learn through exploring objects, domains interrelated,	If you have any questions at all about your baby's development, ask your healthcare provider.And don't feel silly about talking Motherese or baby talk – babies are particularly attuned to this high-pitched, drawn-out way of communicating that can actually teach your baby about the structure and function of language.Do remember that babies have different temperaments and some are less open to new …	1	safe envrionment, Talking reading singing, concerns to PCP,	0
259	Survey, Development, Milestone, Play	App - Professional Organization	Child Dev App	https://drive.google.com/drive/u/1/folders/1-QkG54uULFkFiDpzv3e1paK-ZiWxJvft	N/A	0	Dr. David Macfarlane, PhD, FRCPath	1	Experience in all aspects of microbiology; published widely in various international medical journals, delivered papers at numerous international conferences and lectured at a number of medical schools	1	Health Care Education		0	1	1		164	2	0				0		0
260	Survey, Development, Milestone, Play	App - Professional Organization	Milestones App	https://drive.google.com/drive/u/1/folders/1-5XmBcrZ74Csx9frFRTTp9-4D4yg5MrU	N/A	0.99	FNP	1		0	Health Care Education		0	1	0		190		1	Every child's development is different. Some babies reach important milestones before other babies. Believe it or not, this is normal! It doesn't mean there is anything wrong if your baby does not roll over or begin to babble at the exact right time. It also doesn't mean your baby will be an exceptional student if he reaches these milestones one or two months earlier than normal.	own pace,		0		0
261	Survey, Development, Milestone, Play	App - Professional Organization	My Baby milestones app	https://drive.google.com/drive/u/1/folders/1-8kpdPV2fNxwcnL1nVKpo5YioBqPb8DV	N/A	0		0		0			0	1	0		274		0				0		0
262	Development,Survey	Web Site - Government/ Government Agency	Baby Games Calendar (1wk- 40 wk); Assure the Best brochure; Tummy Time Brochure; Play Brochure	https://pathways.org/baby-milestones-calendar/?page_num=1	2020	0	Michael Msall MD ( Pediatrican), John F. Sarwark MD (pediatrician) ; Suzann K. Campbell, PT, PhD, FAPTA, FAACPDM Laura L. Deon, MD Deborah Gaebler-Spira, MD, FAAP, FAACPDM Karen R. Judy, MD, FAAP Amy Becker Manion, PhD, RN, CPNP Michael N. Nelson, PhD Beth Osten, MS, OTR/L Ana-Marie Rojas, MD Theresa Sukal-Moulton, DPT, PhD Richard Lieber, PhD Lori Walsh, MD Rosemary White-Traut, PhD, RN, FAAN Ni…	1	Michael Msall MD ( Pediatrican), John F. Sarwark MD (pediatrician) ; Suzann K. Campbell, PT, PhD, FAPTA, FAACPDM Laura L. Deon, MD Deborah Gaebler-Spira, MD, FAAP, FAACPDM Karen R. Judy, MD, FAAP Amy Becker Manion, PhD, RN, CPNP Michael N. Nelson, PhD Beth Osten, MS, OTR/L Ana-Marie Rojas, MD Theresa Sukal-Moulton, DPT, PhD Richard Lieber, PhD Lori Walsh, MD Rosemary White-Traut, PhD, RN, FAAN Ni…	1	Health Care Education, Parent, Early Childhood Education, Human Services	Psychology	1	1	1	346	244	90	0		Early Experiences, learn through play,	Giving a child the opportunity, time, and space to play helps to foster many important life skills. Engaging in play allows a child to explore different interests, passions, and talents. Play is a wonderful educational tool that helps prepare them for life experiences	1	opportunities for learning,	0
263	Survey, Play	Web Site - Professional Organization	How to support newborn milestones through play, TUMMY TIME MILESTONES EVERY NEW PARENT SHOULD KNOW	http://www.candokiddo.com/news/newbornplay; http://www.candokiddo.com/news/tummy-time-milestones	2020	0	Pre-kids Rachel assumed her pediatric Occupational Therapist expertise would help her “do it right” when it came to parenting. Three-kids Rachel is a mother forged in the fire of expectations that went up in flames (or more accurately - that my kids burned to the ground).	1	Pre-kids Rachel assumed her pediatric Occupational Therapist expertise would help her “do it right” when it came to parenting. Three-kids Rachel is a mother forged in the fire of expectations that went up in flames (or more accurately - that my kids burned to the ground).	1	Parent, Heath Care Education		0	1	0		86		1	All babies are unique and meet milestones at their own pace. Developmental guidelines simply show what your baby has the potential to accomplish – if not right now, then soon. If your baby was premature, keep in mind that kids born early usually need a bit more time to meet their milestones.; Her understanding of language and her motor skills develop much faster than her ability to speak.	own pace, fast or slow,	Right now almost everything he does is endearing, but as he gets older, he's more likely to get into mischief to provoke a reaction from you. Just don't forget to give him positive feedback when he's being good. It's a great way to start teaching right from wrong.; Avoid clothes with rough or scratchy seams; long ties, buttons, or bows (could be a choking hazard); and anything else that gets in t…	1	safe envrionment,	0
267	Michele, Play	Book - Individual	Fun Baby learning games	N/A	2018	21.21	Sally Goldberg, PhD	1	Sally Goldberg, PhD, also known as Dr. Sally, is a professor of education, author, and magazine writer. She authors a blog at www.earlychildhoodnews.net. Dr. Sally worked as an instructor of early childhood education on the adjunct faculties of Nova Southeastern University, Barry University, and the university of Phoenix. Well-known for her tools and strategies for self-esteem development, she is…	1	Early Childhood Education		1	1	1	102	92	44	1	The first three years of life are more important than most people think. They lay the foundation for all of life to come. Surprising as this may sound, research tells us that if a child has high verbal skills by the age of three, she will likely be successful in school by age six; First is that an enriched early learning environment in the first three to five years sets the stage for later succes…	own pace, Early Experiences, learn through play, play using their senses, always learning, learn through Repetition, domains interrelated, learn from enviornment,	Throughout the book you will see that you are the key player. There is no machine that can take your place. You are vitally needed day in and day out to handle properly the wants and needs of the little ones in your care; As a matter of fact, the human touch, both male and female, is still exactly as important to children as it ever was; Four principles of parenting: Play - Have fun! Act natural …	1	parent bonding and PCI, Talking reading singing,	1	Activities are organized into sections by age range. Within each age range, the activities are ordered by stage of development. To select and activity, first start with the child's age. If your child seems to be developming typically, go directly to the age-appropriate chapter.	this milestone then,
268	Development, Milestone, Survey	App - Individual	CDC's Milestone Tracker		2018	0		0		0			1	1	1	68	91	20	0				0		0
270	Development	Web Site - Professional Organization	WHAT ARE THE 5 STAGES OF CHILD DEVELOPMENT	https://riseservicesinc.org/5-stages-child-development/	2022	0		0		0			1	1	0	1	9		1	"During the first month of life, newborns exhibit automatic responses to external stimuli...Newborns may show signs developmental disabilities, such as spina bifida, genetic disorders and fetal alcohol syndrome...Infants develop new abilities quickly in the first year of life...Slow development in infants may be signs of Down’s syndrome and other developmental disabilities."	fast or slow,		0		0
271	Development	Web Site - Commercial Entity	Periods of Development	https://courses.lumenlearning.com/lifespandevelopment2/chapter/periods-of-development/	N/A	0		0		0			0	1	0		1		0				0		0
272	Development	Web Site - Professional Organization	Baby Development Month by Month	https://www.whattoexpect.com/first-year/month-by-month/	N/A	0	Dr. Lauren Crosby is a pediatrician in Beverly Hills, California, and a nationally-recognized parenting expert. After graduating from Smith College and the UCLA School of Medicine, Dr. Crosby trained at Cedars-Sinai Medical Center, where she served as Chief Resident.	1	Dr. Lauren Crosby is a pediatrician in Beverly Hills, California, and a nationally-recognized parenting expert. After graduating from Smith College and the UCLA School of Medicine, Dr. Crosby trained at Cedars-Sinai Medical Center, where she served as Chief Resident.	1	Health Care Education		1	1	1	57	49	28	0				0		0
273	Development	Web Site - Popular Press	Welcome to Your Baby's First Year	https://www.verywellfamily.com/babys-first-year-guide-4173867	2021	0	RN	1	Chaunie Brusie, RN, has written extensively on pregnancy and parenting for sites such as Babble, Everyday Family, SheKnows.com, and Mom.me. Her work has appeared in American Baby, Pregnancy & Newborn, and Fit Pregnancy and on The New York Times Motherlode.	1	Health Care Education		1	1	1	1	22	1	0				0		0
274	Development	Web Site - Professional Organization	Your Baby's Growth and Development- first 12 months	https://www.pregnancybirthbaby.org.au/baby-development	N/A	0		0		0			0	1	1	0	107	13	0			Spend as much time with your baby as possible. Looking deep into their eyes and smiling at them will help them to bond and to feel safe and secure. As your baby develops more of a rhythm, you’ll find they are awake more during the day. This gives you more time to interact with them and help them develop. Spend plenty of time readingto them, singing, and talking. That way they’ll get used to sound…	1	opportunities for learning, parent bonding and PCI, Talking reading singing,	0
275	Development	Web Site - Professional Organization	Why the first year is so important to future learning	https://www.pbcexpo.com.au/blog/why-the-first-year-is-so-important-to-future-learning	2021	0	PhD, BMgt, RN(Paeds)	1	Dr Jane Williams (PhD, BMgt, RN(Paeds)) is the Research and Education General Manager for GymbaROO and KindyROO. Dr Williams is one of Australia’s leading experts on baby and child development.	1	Health Care Education, Early Childhood Education		1	1	0	1	2		0		Early Experiences,	Research has shown that the correct stimulation for babies can influence how well they behave, read and learn when they reach school. In addition, they have improved confidence, communication and socialisation skills. Research into brain development clearly shows a child’s success at school is set in the earliest years of life. Introducing the correct movement experiences into your baby’s daily l…	1	opportunities for learning,	0
276	Development	Web Site - Professional Organization	Growth and Development, Ages 1 to 12 Months	https://www.uofmhealth.org/health-library/hw251065	2021	0	MD	1	Pediatrics, Family Medicine, Developmental Pediatrics	1	Health Care Education		1	1	0	3	9		0		learn through play,	Talking, reading, and playing are all important ways to help your baby's mind grow.	1	Talking reading singing,	0
277	Development	Web Site - Professional Organization	Your Child's First Year of Development	https://www.onhealth.com/content/1/child_first_year_development	2021	0	MD	1	Melissa Conrad Stöppler, MD, is a U.S. board-certified anatomic pathologist with subspecialty training in the fields of experimental and molecular pathology.	1	Health Care Education		0	1	0		19		0				0		0
278	Development	Web Site - Professional Organization	First Year, 0-12 Months	http://www.urbanchildinstitute.org/why-0-3/parenting/guide/first-year	2021	0		0		0			1	1	1	2	12	1	0				0		0
279	Development	Web Site - Professional Organization	MAKING THE MOST OF YOUR BABY'S FIRST YEAR	https://www.brighthorizons.com/family-resources/making-the-most-of-your-babys-first-year	2021	0		0	Leaders in Early Childhood Education for 30 Years	0			1	1	1	11	8	3	0			taking time to first connect with your baby enhances her learning potential. All of these activities and the many more games and routines special to you and your baby that you create on your own, will help build your baby's language, number and people senses. Slow down, relax and enjoy this really important year.	1	opportunities for learning, parent bonding and PCI,	0
280	Development	Web Site - Professional Organization	Vision Development: Newborn to 12 Months	https://www.aao.org/eye-health/tips-prevention/baby-vision-development-first-year	2022	0		1		1	Health Care Education, Parent		0	1	0		19		0				0		0
281	Development	Web Site - Individual	Language Development 3-12 months	https://raisingchildren.net.au/babies/development/language-development/language-3-12-months	2021	0		0		0			1	1	0	3	16		0				0		0
282	Development	Web Site - Professional Organization	Why The First 5 Years of Child Development Are So Important	https://www.all4kids.org/news/blog/why-the-first-5-years-of-child-development-are-so-important/	2018	0	He has a master’s degree in social work from the University of Long Beach and is earning his MBA. Jose is also Secretary of the National Association of Social Workers	1	He has a master’s degree in social work from the University of Long Beach and is earning his MBA. Jose is also Secretary of the National Association of Social Workers	1	Human Services	Social Work	1	1	1	2	37	3	1	While formal education will begin soon enough, the primary way that babies, toddlers, and young children learn is through play.	learn through play,	At home, caregivers can encourage this by helping their children make sense of the world around them.	1	opportunities for learning,	0
283	Development	Web Site - Professional Organization	Emotional and Social Development, Ages 1 to 12 Months	https://www.healthlinkbc.ca/health-topics/ue5463	2020	0	MD. OT, MS, DO, PharmD, PT	1	John Pope, MD, MPH - Pediatrics & Thomas M. Bailey, MD, CCFP - Family Medicine & Kathleen Romito, MD - Family Medicine & Louis Pellegrino, MD - Developmental Pediatrics	1	Health Care Education		0	1	0		20		1	babies who are cared for in a loving and consistent way develop a powerful bond with their parents and other significant people in their lives.		babies who are cared for in a loving and consistent way develop a powerful bond with their parents and other significant people in their lives.	1	parent bonding and PCI,	0
284	Development	Web Site - Professional Organization	Babies' Physical Development from 0-6 Months	https://www.healthyfamiliesbc.ca/home/articles/babies-physical-development-0-6-months	2018	0		0		0			1	1	1	5	38	3	0				0		0
285	Development	Web Site - Professional Organization	Baby's First Year: Months 1 - 12 (12 separate files)	http://www.essentialbaby.com.au/baby/development/0-6-months	2021	0		0		0			1	1	1	16	13	15	0				0		0
286	Development	Web Site - Commercial Entity	Child development (1) - newborn to three months	https://www.betterhealth.vic.gov.au/health/healthyliving/child-development-1-newborn-to-three-months	2012	0		0		0			1	1	1	9	15	1	1	Coming into the world is a big and scary adventure for babies. At first, they don't know you are there to feed and care for them - they only know when they feel comfortable and safe, or otherwise. However, even from birth, they start to communicate and give you little signals when they are tired or hungry, or awake and alert		They are learning all the time, and the job of parents is to help them know that the world is a welcoming place where their needs will be met	1	parent bonding and PCI,	0
287	Development	Web Site - Professional Organization	Child Development Guide: Ages and Stages	https://www.choc.org/primary-care/ages-stages/	N/A	0		0		0			1	1	1	52	133	16	1	"Doctors use milestones to tell if a baby is developing as expected. There is a wide range of what is considered normal, so some babies may gain skills earlier or later than others"	own pace, responsive communication,	"How can I increase my babys development and emotional security?" This is fine — studies have shown that “baby talk” doesn’t delay speech development. In fact, responding to your baby encourages speech. Feel free to mix in some regular adult words and tone with the baby talk. It may seem early, but you’re setting the stage for your baby’s first words.	1	opportunities for learning, parent bonding and PCI, Talking reading singing,	0
288	Development	Web Site - Professional Organization	Your baby’s brain: How parents can support healthy development	https://www.caringforkids.cps.ca/handouts/pregnancy-and-babies/your_babys_brain	2017	0		0		0			1	0	0	7			0				0		0
289	Development	Book - Professional Organization	Developmental stages in Infant and Toddler Feeding	https://infantandtoddlerforum.org/babies-the-first-year/developmental-stages/	N/A	0		0		0			0	1	0		82		0			Some infants will be very sensitive to the feel of objects and foods, and dislike foods that are messy or textured. This is an inherited dislike but can be helped with messy play	0		0
290	Development	Web Site - Professional Organization	Is Your Baby’s Physical Development on Track?	https://www.healthychildren.org/English/ages-stages/baby/Pages/Is-Your-Babys-Physical-Development-on-Track.aspx	2020	0	American Academy of Pediatrics (Copyright © 2015)	0		0			0	1	0		11		1	Typically, children develop motor skills from the head down First comes head control and then control over the upper body. The typical pattern for motor milestones is rolling over, then sitting, pulling up, standing, walking, and climbing. Small, fine motor skills, such as grasping objects, putting blocks in a cup, and scribbling are important milestones, too.	specific order,		0		0
291	Development	Web Site - Government/ Government Agency	Infant and Newborn Development	https://medlineplus.gov/infantandnewborndevelopment.html	2014	0		0		0			0	1	0		15		0				0		0
292	Development	Web Site - Professional Organization	What Newborns Need for a Healthy Psychological Start	https://www.developmentalscience.com/blog/2016/3/22/h0p2ycwcw6i2ow3z0pjvr30p8il1sj	2016	0	PhD	1	developmental scientist	1	Human Services, Parent	Developmental Psychologist	1	1	0	4	3		1	But how parents respond to these changing states forms a foundation for the baby’s later psychological and social development.; Quiet Alert: This is a good time to give babies their space, to let them get used to feeling comfortable settling alone.; Scientists have so far pointed to two biological mechanisms that underlie infant states and that have implications for later psychological developmen…	Early Experiences,	After birth, postnatal practices like the skin-to-skin contact called kangaroo care are related to longer periods of alertness and more organized sleep-wake cycles. Like the oscillator, vagal tone is also perceptible in the third trimester, around 33-35 weeks gestational age. After birth, it, too, is enhanced through the skin-to-skin contact of kangaroo care and even infant massage. Not surprisin…	1	opportunities for learning, parent bonding and PCI, free play,	1	Active alert: The eyes are open and scanning and alert, and both the facial expressions and body are medium-active. Babies are especially open to social interaction in this state, so this is a good time to gently engage with the baby, talking quietly, singing, touching.; Timing is important. In one of Feldman’s studies, when mothers appropriately chose the babies’ alert state to talk and touch th…	Awake and Alert, overstimulated,
293	Development	Web Site - Individual	Ages and Stages of Development	https://www.cde.ca.gov/sp/cd/re/caqdevelopment.asp	2000	0		0					1	1	1	13	18	2	0				0		0
294	Development	Web Site - Professional Organization	Social Development in 0-2 Year Olds	https://www.scholastic.com/parents/family-life/social-emotional-learning/development-milestones/social-development-0-2-year-olds.html	N/A	0	Michelle Anthony, PhD	1		0	Unspecified	Unspecified	1	1	0	1	7		1	This intimate dyad is part of what researcher Erik Erikson calls the stage of Basic Trust vs. Mistrust. From 0-2, children are engaged in relationships, trying to develop a sense of being nurtured and loved. They seek a relationship that engenders trust, security, and a sense of optimism. If they succeed, they will have mastered the basic psychosocial goals of this age and will advance in develop…	Early Experiences,		1	parent bonding and PCI,	0
295	Development	Web Site - Commercial Entity	The 10 best ways to grow your newborn baby’s brain	https://lovevery.com/community/blog/child-development/the-10-best-ways-to-grow-your-newborn-babys-brain/	N/A	0		0		0			1	1	1	33	7	15	1	The human brain has 100 billion nerve cells, all of which are present at birth but have few links between them. Babies’ brains develop by creating an intricate network between these cells.Until about the fifth month, babies use their eyes as a primary source of information for how the world works.	learn through play,	Research shows that there are certain types of experiences you can give your baby to build those lasting connections. And the good news is, they’re all easy to do; You can help develop your baby’s brain-eye connection by gradually varying the intensity of the light (avoid strong lights, such as direct sun). You can use a dimmer switch, a low lamp, or curtains when your baby is alert; Skin-on-skin…	1	opportunities for learning, Talking reading singing,	1	Once your baby’s eyes start to coordinate, they’ll be drawn to high-contrast images	this milestone then,
296	Development	Web Site - Commercial Entity	Physical Growth and Development in Newborns and Toddlers	https://courses.lumenlearning.com/wmopen-lifespandevelopment/chapter/physical-growth-and-development-in-newborns-and-toddlers/	N/A	0		0					0	1	0		35		1	Reflexes occur automatically and are signals that the infant is functioning well neurologically. Within the first several weeks of life, these reflexes are replaced with voluntary movements or motor skills	specific order,		0		0
297	Development	Web Site - Professional Organization	How will my baby develop from 8 months to 1 year?	https://babyschool.yale.edu/how-will-my-baby-develop-from-8-months-to-1-year/	2021	0		0					0	1	1		27	2	1	Every child develops differently, but at this point in their lives, they’re beginning to weave old skills and new information together to grow more as individuals.	own pace,		0		0
298	Development	Web Site - Professional Organization	YOUR 1 MONTH OLD BABY’S DEVELOPMENT	https://www.emmasdiary.co.uk/baby/month-by-month-baby-development/1-month-old-baby-development	N/A	0		0		0			1	1	1	5	6	1	1	All babies grow at different rates but as a rough guide here are the development milestones to look out for when your baby is 1 month old.	own pace, learn through play,	Make noises and faces/talk about what is goin on to help your 1 month old develop; Give your baby some tummy time every day – just a minute or two daily helps to strengthen their back and shoulder muscles	1	opportunities for learning, Talking reading singing,	0
299	Development	Book - Professional Organization	Mayo Clinic Guide to Your Baby's First Years, Second Edition	https://marketplace.mayoclinic.com/shop/healthy-lifestyle/book/mayo-clinic-guide-to-your-babys-first-years-second-edition_296600	2020	24.95	Walter J. Cook M.D: specialist in general pediatric care	1	specialist in general pediatric care	1	Health Care Education		1	1	1	60	188	34	0			These everyday expressions of love and affection promote bonding to the parent. They also help a baby's brain develop.	1	parent bonding and PCI,	1	"Around this time your baby may become more interested in objects or toys that he or she can touch or hold."	babys lead,
300	Development	Web Site - Commercial Entity	What you need to know about baby's first milestones	https://www.todaysparent.com/baby/what-you-need-to-know-about-babys-first-milestones/	2018	0		0		0			1	1	1	2	30	4	0				0		0
301	Development	Web Site - Popular Press	Your Baby's Eye Development	https://www.bausch.com/vision-and-age/infant-eyes/eye-development	2018	0		0		0			1	1	1	2	9	1	0				0		0
302	Development	Web Site - Government/ Government Agency	Baby development stages	https://www.education.vic.gov.au/parents/child-development/Pages/babies-development.aspx	2018	0		0		0			1	1	1	31	37	2	0				0		0
303	Development	Web Site - Professional Organization	How and when do babies develop social skills?	https://www.nct.org.uk/baby-toddler/emotional-and-social-development/how-and-when-do-babies-develop-social-skills	N/A	0		0		0			1	1	0	1	8		0				0		0
304	Development	Web Site - Professional Organization	How to Encourage a Child's Brain Development	https://helpmegrowmn.org/HMG/HelpfulRes/Articles/HowEncourageBrainDev/index.html	N/A	0		0		0			1	0	1	4		1	0				0		0
305	Development	Web Site - Professional Organization	Infancy Emotional/Social Development: Emotional Expression and	https://www.gracepointwellness.org/461-child-development-parenting-infants-0-2/article/10116-infancy-emotional-social-development-emotional-expression-and-understanding	N/A	0	MSW	1		0	Human Services	Social Work	0	1	0		13		1	as suggested by Bronfenbrenner's theory, the environmental experiences babies have as they grow and develop are also important influences in their emotional and social development.	Early Experiences, learn from enviornment,		0		0
306	Development	Web Site - Professional Organization	Brain Development of Children from 0-6 years – Facts every parent should know	https://www.adam-mila.com/brain-development-children-0-6-years/	N/A	0		0		0			1	1	1	12	4	2	0			Stages of Brain Development from Birth to 6 Years Old (and How You Can Help!) (this whole section applys)	1	opportunities for learning,	0
307	Development	Web Site - Professional Organization	Brain Development	https://www.firstthingsfirst.org/early-childhood-matters/brain-development/	N/A	0		0		0			1	0	0	1			1	From birth to age 5, a child’s brain develops more than at any other time in life. And early brain development has a lasting impact on a child’s ability to learn and succeed in school and life. The quality of a child’s experiences in the first few years of life – positive or negative – helps shape how their brain develops.; The early childhood years are crucial for making these connections. At le…	Early Experiences, fast or slow,	Starting from birth, children develop brain connections through their everyday experiences. They’re built through positive interactions with their parents and caregivers and by using their senses to interact with the world. A young child’s daily experiences determine which brain connections develop and which will last for a lifetime. The amount and quality of care, stimulation and interaction the…	1	parent bonding and PCI,	0
308	Development	Web Site - Professional Organization	Fine motor skills: birth to 2 years	https://www.chrichmond.org/therapy-services/occupational-therapy/developmental-milestones/fine-motor-skills-birth-to-2-years	2021	0		0		0			1	1	1	7	23	6	0				0		0
309	Development	Web Site - Popular Press	10 Ways to Promote Baby Development	https://www.everydayhealth.com/hs/your-developing-baby/ways-to-promote-baby-development/	2014	0	Dr. Pat Bass is a board certified general internist and pediatrician at Louisiana State University Health Sciences Center in Shreveport, and the chief medical information officer at LSU Health-Shreveport. He is an active clinician, teacher, and researcher who also writes and edits for HealthDay.	1	health writer	1	Health Care Education	health writer	1	1	1	10	3	5	0				0		0
310	Development	Web Site - Individual	Baby Milestones: 0 to 12 Months	https://theinspiredtreehouse.com/baby-milestones-0-12-months/	2017	0		0		0			1	1	1	18	29	20	0				0		0
311	Development	Web Site - Professional Organization	Infant vision development: Helping babies see their bright futures!	https://www.canr.msu.edu/news/infant_vision_development_helping_babies_see_their_bright_futures	2014	0		0		0			1	1	1	13	8	7	0				0		0
312	Development	Web Site - Professional Organization	Cognitive Development: Infants and Toddlers	https://www.virtuallabschool.org/infant-toddler/cognitive/lesson-2	N/A	0		0		0			0	1	0		17		0			As an infant toddler caregiver, do the following to support developmental milestones: Give infants and toddlers the safe space they need for movement and discovery (areas for climbing, crawling, pulling up, etc.) Offer safe, developmentally appropriate materials for exploring (foam blocks, board books, musical instruments, containers for sorting and filling, etc.) Provide a consistent, nurturing …	1	opportunities for learning, parent bonding and PCI, safe envrionment, concerns to PCP,	0
314	Development	Web Site - Commercial Entity	Child development 0–3 months	https://www.healthywa.wa.gov.au/Articles/A_E/Child-development-0-3-months	2019	0		0		0			1	1	1	13	12	1	0				0		0
315	Development	Web Site - Professional Organization	Vision in the first year	https://www.aboutkidshealth.ca/Article?contentid=484&language=English	N/A	0		0		0			0	1	0		15		0				0		0
316	Development	Web Site - Individual	15 TOYS FOR BABY’S FIRST YEAR	http://mamaot.com/15-toys-for-babys-first-year/	2012	0	OT	1	Mama to two precious kiddos and OT to many	1	Health Care Education, Parent		1	0	1	9		15	0				0		0
317	Development	Web Site - Professional Organization	Communicating with Baby: Tips and Milestones from Birth to Age 5	https://www.naeyc.org/our-work/families/communicating-with-baby	N/A	0	MS, CCC-SLP	1	Adena Dacy, MS, CCC-SLP, is associate director, clinical issues in speech-language pathology, at the American Speech-Language-Hearing Association	1	Health Care Education		1	1	1	18	26	3	1	Before formal schooling ever begins, there are critical periods of rapid development when the brain is best able to acquire speech (sound production) and language (understanding and using words). As young children grow, their communication skills become more complex. They learn to understand and use language to express their thoughts and feelings and to connect with others.	fast or slow,	Parents, family members, and caregivers are children’s most important teachers and communication models.	1	parent bonding and PCI, Talking reading singing,	0
318	Development	Web Site - Professional Organization	Your baby’s mental leaps in the first year	https://www.thewonderweeks.com/babys-mental-leaps-first-year/	N/A	0		0		0			0	1	0		16		0				0		0
319	Development	Web Site - Professional Organization	Developmental Milestones	https://www.mottchildren.org/posts/your-child/developmental-milestones	2022	0	MD	1	Dr. Mohammed is board certified in general pediatrics. She has an interest in caring for children with special needs. She is involved in community projects related to children with developmental needs, particularly for low income families. Languages spoken other than English : Arabic	1	Health Care Education		0	1	1		163	2	0				0		0
320	Development	Web Site - Professional Organization	Speech and language development from birth to 12 months	https://www.gosh.nhs.uk/conditions-and-treatments/procedures-and-treatments/speech-and-language-development-birth-12-months/	2016	0		0		0			1	1	1	13	21	5	0				0		0
321	Development	Web Site - Popular Press	First Year: The Ultimate Month By Month Guide	https://amotherfarfromhome.com/baby-first-year/	N/A	0		0	B.A., M.S., certified sleep consultant, Language of Listening® parent coach, self-proclaimed Routine Expert, and mother of 5.	1	Parent, Other	certified sleep consultant	0	1	0		43		0				0		0
322	Development	Web Site - Professional Organization	Baby and Toddler Milestones: 16 Gestures by 16 Months	https://www.readingrockets.org/article/baby-and-toddler-milestones-16-gestures-16-months	2014	0		0		0			0	1	0		16		1	by age three, most of the major brain circuits are mature, and later it becomes more difficult to make significant changes in a child’s growth trajectory.	Early Experiences,	By observing children’s early gestures, you can obtain a critical snapshot of their communication development. Even small lags in communication milestones can add up and impact a child’s rate of learning that is difficult to change later.	1	concerns to PCP,	0
323	Development	Book - Individual	Baby's First Year: A Complete Guide on What to Expect From Your First Parenting Year - Including Baby Sleep, Baby Food Recipes, Baby Games, and Your Baby's Cognitive Development	https://www.barnesandnoble.com/w/babys-first-year-daniel-rott/1131192548	2019	0		0		0			1	1	1	70	2	11	1	A lot of studies conducted on monkeys and their newborn infants have shown that early stage bonding makes the baby healthier, better behaved and quite smart. The studies have shown signs that early stage bonding is very importanat because it shpaes the brain in a particular way	Early Experiences,		0		0
324	Development	Web Site - Professional Organization	6 – 12 Months: Child Development During the First Year	https://www.askdrsears.com/topics/parenting/child-rearing-and-development/bright-starts-babys-development-through-interactive-play/6-12-months-baby-move	2020	0		0		0			1	1	1	17	12	15	0			Here is what you can expect and how to support child development during the first year:	1	opportunities for learning,	0
325	Development	Web Site - Professional Organization	Babies Development Checklist During the First Year	https://www.pinterest.com/pin/406449935121003600/	N/A	0		0		0			0	1	0		48		0				0		0
326	Play- Addition	Web Site - Professional Organization	EI Smart, Helping my baby learn through play 0-3 months old	pdf Google Drive	2018	0	by B. Hutchon and S. Powell–Paediatric Occupational Therapy, with Dr. A. Fernandez-Neonatologist San Jose Hospital, Chile.	1	y B. Hutchon and S. Powell–Paediatric Occupational Therapy, with Dr. A. Fernandez-Neonatologist San Jose Hospital, Chile.	1	Health Care Education		1	0	1	44		19	0		learn through play,	babies learn in the context of a relationship so talking, playing and affectionate touching will develop your babies cognitive, language and motor skills	1	opportunities for learning, parent bonding and PCI, Talking reading singing,	0
330	Development	Web Site - Professional Organization	Your Child's Development: Newborn; 3-5 Days; 4 Months: 6 Months; 9 Months; 1 Year	https://kidshealth.org/en/parents/development-newborn.html	2022	0	DO	1		0			0	1	1		123	5	1	Notice your baby doing anything new? Big strides in development happen this month. That's because the left side of the brain is now "talking" to the right side of the brain.; Nine-month-olds have a new understanding of the world. They learn that just because they can't see mom or dad at a certain time doesn't mean they don't exist. So now, your baby may begin to miss you when you're gone. This ca…	always learning,		0		0
331	Development	Web Site - Commercial Entity	Why is Child Development So Important in Early Years?	https://www.highspeedtraining.co.uk/hub/child-development-in-early-years/	2021	0		1	Rosalyn Sword is a Learning Designer with a primary focus on the Education sector at High Speed Training. She has a Master's in Linguistics from the University of Cambridge and experience working within education, taking part in research on children's language development and supporting EAL students.	1	Early Childhood Education		1	1	1	10	44	4	0	Development describes the way a child grows, changes, and develops skills – not only physically, but also socially, emotionally, cognitively and communicatively.		As a result, it is important for parents and those who work with children to support and encourage development in all domains. All children learn more if the adults around them make a purposeful effort to help them. Think of cognitive development, for example; children can only learn the names of different colours or animals if they have been told them.	1	opportunities for learning, Talking reading singing,	0
332	Development	Web Site - Commercial Entity	Why Your Baby’s First Years of Life Matter Most	https://medium.com/swlh/why-your-babys-first-years-of-life-matter-most-52615f74d481	2019	0		0	Psychologist, spiritual teacher & mom, passionate about fulfilling our highest potential!	1	Parent, Human Services	Psychologist, spiritual teacher	1	1	0	4	2		1	Provides following link: https://returntonow.net/2017/11/03/love-makes-babys-brain-bigger-neglect-shrinks-neurologist-says/	Early Experiences, responsive communication,	What’s also important to note, is that a child’s brain develops best in one-on-one conversations and empathetic interactions with an adult.	1	parent bonding and PCI,	0
333	Development	Web Site - Commercial Entity	15 Fun Things to Do Before Baby Turns One	https://www.parenting.com/activities/baby/things-to-do-babys-first-year/	N/A	0		0		0			1	1	1	14	3	6	0				0		0
334	Development	Web Site - Professional Organization	Infant development: Milestones from 10 to 12 months	https://www.mayoclinic.org/healthy-lifestyle/infant-and-toddler-health/in-depth/infant-development/art-20047380	2020	0		0		0			1	1	1	6	17	5	0				0		0
335	Development, Milestone	Web Site - Commercial Entity	Baby Milestones: The First Year	https://immunifyme.com/blog/baby-milestones-the-first-year/	2022	0		0		0			0	1	1		63	2	0				0		0
336	Development	Web Site - Professional Organization	0-1 month: newborn development	https://raisingchildren.net.au/newborns/development/development-tracker/0-1-month	2022	0		0		0			1	1	1	6	4	1	0		Early Experiences,	try reading and telling stories, talking and singing. Doing these things every day also helps your baby get familiar with sounds and words. In turn, this develops language and communication skills your baby will need when they’re older.	1	Talking reading singing,	1	Sometimes your baby won’t want to do these things – for example, they might be too tired or hungry. Your baby will use special baby cues to let you know when they’ve had enough and what they need.	overstimulated, babys lead,
337	Development	Web Site - Government/ Government Agency	Development & Milestones for Infants (Birth - 12 months)	https://www.michigan.gov/mikidsmatter/parents/infant/milestones	N/A	0		0		0			0	1	1		89	1	0				0		0
338	Development	Web Site - Professional Organization	Developmental milestones from birth to age 1	https://www.understood.org/en/articles/developmental-milestones-from-birth-to-age-1	2022	0		0	Amanda Morin is the author of “The Everything Parent’s Guide to Special Education” and the former director of thought leadership at Understood. As an expert and writer, she helped build Understood from its earliest days.	1	Other	Author, Director of thought leadership	0	1	1		65	4	0				0		0
339	Development, Milestone	Web Site - Professional Organization	Well-Baby Care Visits & Developmental Milestones (Age 0-12m)	https://my.clevelandclinic.org/health/articles/22063-baby-development-milestones-safety	2021	0		0		0			0	1	1		42	1	0				0		0
340	Development	Web Site - Professional Organization	Your Baby from 6-12 Months	https://www.firstthingsfirst.org/parent-kit/baby-6-12-months/	2022	0		0		0			1	1	1	5	8	1	1	He learns through seeing, touching, hearing, tasting, smelling and moving. He learns through stories, songs, rhymes and games, like peekaboo and patty-cake. When he looks away or fusses, it is time to stop playing. To find out more about how your baby learns, visit Zero to Three or Pathways.	learn through play, play using their senses,	Your baby learns more from playing and being with you than from anything else. Babies learn by exploring with their mouths, eyes, ears and hands. Your baby needs things to touch, grasp, push, throw and safely put in her mouth. She needs a calm, safe place so she can play freely and actively.	1	opportunities for learning, parent bonding and PCI, safe envrionment, Talking reading singing,	1	When he looks away or fusses, it is time to stop playing. To find out more about how your baby learns, visit Zero to Three or Pathways.	overstimulated,
341	Development	Web Site - Commercial Entity	Birth to 5 Years: Updates to Your Child’s Developmental Milestones	https://www.bannerhealth.com/healthcareblog/teach-me/birth-to-five-years-knowing-your-childs-developmental-milestones	2022	0	master in health communications	1	Regan Olsson is a freelance writer and editor, who specializes in nonprofit, fundraising and healthcare-related content for both print and digital mediums. Regan has worked in both for-profit and nonprofit industries serving in various marketing communications roles. She has a master’s in health communications and enjoys researching and developing copy that enlightens and empowers others. The mot…	1	Parent, Other	MS Heath Communications	0	1	0		32		1	“Eighty-five to ninety percent of a child’s brain develops by age five,” said Russell Horton, DO, a physician with Banner Health Center in Queen Creek, AZ. “This means your child is able to grow and develop new skills quickly—from thinking and speaking skills to social and emotional skills.”	fast or slow,		0		0
342	Development	Web Site - Commercial Entity	Motor Development in the First Year	https://www.tinylove.com/us_en/articles/baby-first-year-motor-development	2022	0	MSC PT	1		0	Health Care Education		1	1	1	7	28	1	1	Notice how the various areas of development are interconnected and see how we as parents can offer the kind of environment and stimulation that allows baby to realize his or her full developmental potential. Remember, development is not a linear process and babies might skip stages or acquire various motor abilities simultaneously	own pace, domains interrelated,		1	opportunities for learning, parent bonding and PCI,	0
343	Development	Web Site - Government/ Government Agency	Playtime with your baby: Learning and growing in the first year	https://caringforkids.cps.ca/handouts/pregnancy-and-babies/playtime_with_your_baby	2022	0		0		0			1	0	1	11		25	0				1	opportunities for learning, parent bonding and PCI,	0
344	Development	Web Site - Professional Organization	Your Child’s Development: 3-5 Days	https://kidshealth.org/en/parents/development-3to5d.html	2021	0	MD	1		0	Health Care Education		0	1	0		14		0				0		0
345	Milestone	Web Site - Commercial Entity	Your 3-Month-Old Baby’s Milestones & Development	https://www.verywellfamily.com/your-3-month-old-baby-development-and-milestones-4172049	2022	0	Double board-certified in pediatrics and neonatology	1	Wendy Wisner is an international board certified lactation consultant (IBCLC) and lactation educator counselor. She has worked with breastfeeding moms since 2009, and has written about all things breastfeeding, maternal/child health, parenting, and general health and wellness for many publications, both online and in print. She is mother to two boys.	1	Parent, Health Care Education		1	1	1	3	17	1	0				0		0
346	Milestone	Web Site - Commercial Entity	The Ultimate Guide To Baby Milestones For The First Year	https://kidactivitieswithalexa.com/en/the-best-guide-to-baby-milestones/	2022	0		0		0			0	1	0		72		0				0		0
347	Milestone	Web Site - Professional Organization	First Year Milestones	https://www.birthinjuryhelpcenter.org/first-year-developmental-milestones.html	2022	0		0		0			0	1	0		55		0				0		0
348	Milestone	Web Site - Commercial Entity	The Ultimate Guide To Baby Milestones For The First Year	https://kidactivitieswithalexa.com/en/the-best-guide-to-baby-milestones/	2022	0		0	I am a sensory teacher, bilingual mother, stepmother, and believer of learning through play.	1	Parent, Other	sensory teacher	1	1	0	3	145		0				0		0
349	Milestone	Web Site - Popular Press	Understanding Baby’s Milestones in the First Year	https://www.baby-chick.com/understanding-babys-milestones/	2021	0		0	Melinda Jensen is a mom of four and Marketing Manager at Infantino.	1	Parent, Other	Marketing Manager	1	1	1	2	15	2	0			You can help baby develop their sight and hearing, too, by showing them new colors and naming items.	1	opportunities for learning,	0
350	Milestone	Web Site - Commercial Entity	Baby Milestones	https://www.emmasdiary.co.uk/baby/baby-milestones	2022	0		0		0			0	1	0		15		0				0		0
351	Milestone	Web Site - Commercial Entity	Development Milestones In Your Baby’s First 18 Months	https://www.mylicon.com/advice-item/infant-milestones/	2022	0		0		0			1	1	0	3	67		0				0		0
352	Milestone	Web Site - Commercial Entity	Developmental Milestones of Your Baby in Her First Year	https://kauveryhospital.com/blog/paediatrics/developmental-milestones-of-your-baby-in-her-first-year/	2020	0		0		0			1	1	0	1	22		1	As already mentioned, parents should remember that every child is unique and grows at his/her own pace. The milestones given above are not absolute; there is no cut off time for the child to achieve them	own pace,		0		0
353	Play	Web Site - Professional Organization	Learning, Play and Your NEwborn	https://kidshealth.org/en/parents/learnnewborn.html	2022	0	Mary L. Gavin, MD	1		0	Health Care Education		1	1	1	9	4	4	1	Play is the main way that infants learn how to move, communicate, socialize, and understand their surroundings. During the first month of life, your baby will learn by interacting with you.	learn through play, responsive communication,	As you care for your newborn, talk, smile, and interact with your baby. Pay attention and respond to your baby's cues. For example, watch how your baby moves or starts to make sounds back when you speak. Take turns "talking" to each other. This is how your baby learns to communicate.	1	opportunities for learning, Talking reading singing,	1	You'll learn to recognize when your baby is ready to learn and play:A baby who is quiet and alert will be attentive and responsive and interested in their surroundings. Encourage learning with smiles, soothing sounds, and gentle caresses.	Awake and Alert, babys lead,
354	Play	Web Site - Commercial Entity	Activities to Do With Your Newborn	https://www.pampers.com/en-us/baby/activities/article/newborn-activities	2021	0		0		0			1	1	1	25	2	9	0			Your baby’s vision will develop slowly over the first months and years, but you can start encouraging tracking by moving something eye-catching slowly in front of him	1	opportunities for learning,	0
355	Play	Web Site - Commercial Entity	How to Play with Your Newborn: 7 Ideas for Baby Playtime	https://www.healthline.com/health/baby/how-to-play-with-newborn	2020	0	Medically Reviewed RN, CPN	1		0	Health Care Education		1	1	1	10	6	3	0			Even small moments spent making funny faces or singing nursery rhymes can help to encourage development and engage your baby	1	Talking reading singing,	1	While they aren’t able to tell you in words that they’re having a good time, you’re likely to notice signs that your baby is ready for — and interested in — playtime each day. While they spend a lot of time sleeping (for the first 6 months your baby will probably be asleep 14 to 16 hours each day) you’ll start to see times when they’re awake and alert, but calm.	Awake and Alert,
356	Play	Web Site - Commercial Entity	How to Play with a Baby	https://www.wikihow.life/Play-with-a-Baby	2021	0		0	Jami Yaeger is a Parenting Specialist, Doula, and the Owner of AustinBorn, an online community offering comprehensive and modern education to growing families. With 10 years of experience, Jami specializes in whole family support for pregnancy, birth, postpartum, and parenting. Jami earned her BA in Theatre Performance from San Diego State University and earned her Certification as a Lactation Ed…	1	Other	Doula, Certification as a Lactation Education Counselor	1	1	1	25	5	12	0			After the baby is a few months old, they will start developing the ability to hold onto objects. You can help encourage this skill by giving them a small rattle to hold.	1	opportunities for learning,	0
357	Play	Web Site - Commercial Entity	23 Baby Game Ideas for Your Baby's First Year	https://www.pampers.com/en-us/baby/activities/article/baby-games	2020	0		0		0			1	1	1	23	2	13	0			Just like talking to your baby, reading and looking at picture books together is a great way to promote language and cognitive development while bonding with your little one	1	Talking reading singing,	0
358	Play	Web Site - Commercial Entity	20 Ways to Play with a Newborn 0-3 Months Old	https://www.teachinglittles.com/ways-to-play-with-newborn/	2021	0		0		0			1	1	1	35	4	13	1	Play is the most important way that babies and toddlers learn. They explore their environment, learn language, develop relationships, strengthen motor skills, and gain knowledge through play. Newborn activities for development are important and they can start as early as 1 week old; You may be surprised to know that the human brain grows and develops at the fastest rate when they are babies and t…	Early Experiences, learn through play, fast or slow, learn from enviornment,	Activities for newborn babies are actually quite simple, but still very beneficial; It may not be apparent right now, but you will be providing them with important sensory input to their body’s joints, strengthening muscles for physical development, and brain stimulation for social and emotional interaction and so much more	1	opportunities for learning, parent bonding and PCI,	0	During their first month of life your baby will learn so much just by interacting with you on a daily basis. The best news though, is that you can start playing with your baby at any time- the sooner the better.
359	Play	Web Site - Professional Organization	Simple Ways to Entertain and Boost Your Baby's Development at Home	https://www.healthychildren.org/English/family-life/power-of-play/Pages/simple-ways-to-entertain-and-boost-your-babys-development-at-home.aspx	2022	0	Anne H. Zachry, PhD, OTR/L	1		0	Health Care Education		1	1	1	15	1	5	0				0		0
360	Play	Web Site - Popular Press	15 games to play with your 0 to 6-month-old baby	https://www.madeformums.com/baby/15-games-to-play-with-your-0-6-month-baby/	N/A	0		0		0			1	0	1	15		9	0		learn through play,	All you need to play with your baby is you. It's all about interacting with your baby to bond, giggle, cuddle and learn. This is the kind of loving, playful interaction that will help all the parts of your baby's brain connect and grow, and spur those little muscles to develop and strengthen.	1	opportunities for learning, parent bonding and PCI,	0
361	Play	Web Site - Popular Press	25 Things to Do With Babies at Home	https://www.sitters.co.uk/blog/25-things-to-do-with-babies-at-home.aspx	2022	0		0		0			1	0	1	25		9	0				0		0
362	Play	Web Site - Commercial Entity	Why is Play important?	http://www.brillbaby.com/after-birth/the-importance-of-play.php	2022	0		0		0			1	0	0	5			0		Early Experiences, learn through play,	It is through play that your child will develop essential life skills, learn how to interact with peers and with adults, discover creativity, adapt and develop new skills, and also learn a whole range of emotions. Play has a vital role in your child's mental and physical development, and as a parent, you must realize your responsibility in creating opportunities for your child to play. Babies and…	1	opportunities for learning,	0
363	Play	Web Site - Popular Press	12 Simple Developmental Activities to Play with Your Baby	https://www.familyeducation.com/fun/activities-babies/its-playtime-baby-12-simple-developmental-activities-try-your-tot	2022	0		0		0			1	0	1	12		10	1	"Much of your baby's learning in her first year will happen naturally as you talk, read, make faces, and interact with her every day."	learn through play,	"These fun and easy activities help stimulate your infant's development..."	1	opportunities for learning, Talking reading singing,	0
364	Play	Web Site - Commercial Entity	20 fun baby games: How to play with a 6-month-old baby	https://babyology.com.au/baby/development/20-fun-baby-games-how-to-play-with-a-6-month-old-baby/	2019	0		0		0			1	0	1	20		6	0				0		0
365	Play	Web Site - Popular Press	How to Play With a Newborn?	https://www.momnewsdaily.com/baby/how-to-play-with-a-newborn/	2021	0		0		0			1	0	1	8		1	0		learn through play,	Playing games with young babies also help their brain development.	0		0
366	Play	Web Site - Government/ Government Agency	The Power of Play: 5 Tips to Productive Play with Your Baby or Toddler	https://va.gapitc.org/the-power-of-play-5-tips-to-productive-play-with-your-baby-or-toddler/	N/A	0		0		0			1	0	1	5		5	1	The simple interactions exchanged during playtime encourage young children to learn and explore the world around them, which is crucial to early childhood development.	Early Experiences, learn through play,	Spending time playing with your baby or toddler is not only a fun opportunity to engage and connect with one another but it’s also a great teaching tool; You are the first and most important playmate your child has in their early years. You’re also their most trusted relationship, which encourages them to try new things in a safe environment.; Playing with your child provides them with a nurturin…	1	opportunities for learning, parent bonding and PCI, safe envrionment,	0
367	Play	Web Site - Popular Press	7 Fun And Engaging Ways To Play With Your Newborn	https://www.scarymommy.com/how-play-newborn	2020	0		0		0			1	0	1	7		2	0				0		0
368	Play	Web Site - Commercial Entity	Learning Activities for 3 Month Old Babies	https://www.howweelearn.com/learning-activities-3-month-old-babies/	2022	0		1	Teacher, homeschooling Mom of 4, reading specialist, curriculum creator	1	Parent, Early Childhood Education		1	0	1	13		1	0				0		0
369	Play	Web Site - Commercial Entity	How to Play Peek-a-boo	https://www.himama.com/learning/child-activities/activity/peek-a-boo-game-for-toddlers	N/A	0		0	Early Childhood Educator and Social Media and Community Specialist; In a previous life, Kiah worked in a preschool classroom in Toronto. She has her degree in Early Childhood Education with a minor in Psychology from Ryerson University	1	Early Childhood Education		1	0	1	3		3	0				0		0
370	Play	Web Site - Commercial Entity	HOW TO PLAY WITH A 2 MONTH OLD	https://theeducatorsspinonit.com/how-to-play-with-2-month-old/	2022	0		0	Early childhood teacher, author, speaker and mom of 3.	1	Early Childhood Education, Parent, Other	Author and Speaker	1	0	1	4		5	0				0		1	Too much stimulation is not a good thing either. I try to watch for signs that he is interested; cooing, smiling, alert eyes, and to watch for disinterest fussing, turning away or wrinkling his brow (he does do this and I think it is the cutest ever, but it is his sign for getting frustrated and I know we need to stop or change activities or he will cry)	Awake and Alert, overstimulated,
371	Play	Web Site - Commercial Entity	How to Play with Your Newborn : Month 1	https://www.candokiddo.com/news/2015/1/2/baby-play-activities-for-month-one	2021	0	OT	1	Rachel Coley, MS, OT/L pronouns: she/her Pre-kids Rachel assumed her pediatric Occupational Therapist expertise would help her “do it right” when it came to parenting. Three-kids Rachel is a mother forged in the fire of expectations that went up in flames (or more accurately - that my kids burned to the ground).	1	Health Care Education, Parent		1	1	1	5	1	1	0				0		0
372	Play	Web Site - Commercial Entity	4 month old Activities	https://parenting.firstcry.com/articles/10-best-developmental-activities-for-4-months-old-baby/	2022	0		0		0			1	1	1	13	4	5	0		learn through play,	If you’re excited just seeing your baby stare curiously at you, you’ll be glad to know that this is a ripe time for learning. The correct activities and teaching methods will skyrocket your baby’s cognitive, emotional and physical development. This is the time to engage and play with your child as much as possible.	1	opportunities for learning,	0
373	Play	Web Site - Commercial Entity	When do babies start playing with toys? What you need to know	https://www.newfolks.com/inspiration/when-do-babies-play/	2021	0		0	Leslie Anderson is a freelance writer/writing coach from Roswell, N.M. She enjoys gardening, cooking, and helping students and clients to find their "voice" and inspiration through the art of writing.	1	Other	Writer/Writing Coach	1	0	1	7		15	0			At this age, you play a major role in your baby’s playtime.	1	opportunities for learning,	0
374	Play	Web Site - Commercial Entity	Hand and Finger Games to Play with Your Baby	https://parents.highlights.com/hand-and-finger-games-to-play-your-baby	2022	0		0		0			1	0	1	6		4	0				0		0

## Sheet: Thematic Coding by Search
Source ID	Search	Dev Process Info provided	Development happens in a specific order	Milestones occur "at their own pace"	Early Experiences are Important	Children learn through play	Play using senses	Babies are always learning	Babies learn through exploring	Repetition is important for learning	learn langauge through responsive communication	Development happens FAST or SLOW	Developmental domains are related	Babies learn from their enviornment	Parent Role Info Provided	Parents provide opportunities for learning	Importance of parent bonding and parent-child interactions	parents create a safe envrionment for development	Talking and reading to baby is important	Identifiying or bringing up developmental concerns to PCP	Rotating activities to maintain attention	free-play is important	Readiness to Play Instructions Provided	Awake and Alert	When baby has met a past milestone, try…	Stop playing if showing signs of overstimulated	Follow babies lead
1	Play	1	0	0	1	1	0	0	1	0	0	0	0	0	1	1	1	0	0	0	0	0	1	1	1	1	1
3	Play	1	0	0	0	1	0	0	0	0	1	0	0	0	1	0	1	0	0	0	0	0	0	0	0	0	0
4	Play	0	0	0	0	0	0	0	0	0	0	0	0	0	0	0	0	0	0	0	0	0	0	0	0	0	0
5	Play	0	0	0	0	0	0	0	0	0	0	0	0	0	0	0	0	0	0	0	0	0	0	0	0	0	0
6	Play	1	0	0	1	1	0	0	0	0	1	0	0	0	0	0	0	0	0	0	0	0	1	0	0	0	1
7	Play	0	0	0	0	0	0	0	0	0	0	0	0	0	0	0	0	0	0	0	0	0	0	0	0	0	0
8	Play	0	0	0	0	0	0	0	0	0	0	0	0	0	0	0	0	0	0	0	0	0	0	0	0	0	0
9	Play	1	0	0	0	0	0	0	0	0	1	0	0	0	1	0	0	0	1	0	0	0	0	0	0	0	0
10	Play	1	0	0	1	0	0	0	0	0	0	0	0	0	1	0	1	0	0	0	0	0	1	1	0	0	1
11	Play	0	0	0	0	0	0	0	0	0	0	0	0	0	1	0	1	0	0	0	0	0	1	0	0	1	0
12	Play	1	0	0	0	1	0	0	0	0	0	0	0	0	1	1	0	0	0	0	0	0	0	0	0	0	0
13	Play	0	0	0	0	0	0	0	0	0	0	0	0	0	0	0	0	0	0	0	0	0	0	0	0	0	0
14	Play	0	0	0	0	0	0	0	0	0	0	0	0	0	0	0	0	0	0	0	0	0	0	0	0	0	0
15	Play	0	0	0	0	0	0	0	0	0	0	0	0	0	0	0	0	0	0	0	0	0	0	0	0	0	0
16	Play	0	0	0	0	0	0	0	0	0	0	0	0	0	0	0	0	0	0	0	0	0	0	0	0	0	0
17	Play	0	0	0	0	0	0	0	0	0	0	0	0	0	1	1	0	1	0	0	0	0	1	0	0	1	0
18	Play	0	0	0	0	0	0	0	0	0	0	0	0	0	0	0	0	0	0	0	0	0	0	0	0	0	0
20	Play	1	0	0	1	0	0	0	0	0	0	0	0	0	1	0	1	0	0	0	0	0	0	0	0	0	0
21	Play	0	0	0	0	0	0	0	0	0	0	0	0	0	1	0	0	0	0	0	1	0	1	0	0	1	0
22	Play	1	0	0	1	1	0	0	0	0	0	0	0	0	1	1	1	0	1	0	0	0	1	0	0	1	1
23	Play	1	0	0	0	1	0	0	0	0	0	1	0	0	0	0	0	0	0	0	0	0	0	0	0	0	0
24	Play	1	0	0	1	0	0	0	0	0	0	0	0	0	0	0	0	0	0	0	0	0	0	0	0	0	0
25	Play	0	0	0	0	0	0	0	0	0	0	0	0	0	0	0	0	0	0	0	0	0	0	0	0	0	0
26	Play	0	0	0	0	0	0	0	0	0	0	0	0	0	1	1	0	0	0	0	0	0	0	0	0	0	0
27	Play	1	0	0	0	1	0	0	0	0	0	0	0	0	1	1	0	1	0	0	0	1	1	0	0	0	1
28	Play	0	0	0	0	0	0	0	0	0	0	0	0	0	0	0	0	0	0	0	0	0	0	0	0	0	0
29	Play	1	0	0	1	1	1	1	1	0	0	0	0	0	1	1	1	0	0	0	0	0	0	0	0	0	0
30	Play	0	0	0	0	0	0	0	0	0	0	0	0	0	1	1	1	0	0	0	0	0	0	0	0	0	0
31	Play	1	0	0	0	1	0	0	0	0	0	0	0	0	1	0	1	0	0	0	0	0	0	0	0	0	0
32	Play	0	0	0	0	0	0	0	0	0	0	0	0	0	0	0	0	0	0	0	0	0	0	0	0	0	0
33	Play	0	0	0	0	0	0	0	0	0	0	0	0	0	1	0	1	0	0	0	0	0	0	0	0	0	0
34	Play	0	0	0	0	0	0	0	0	0	0	0	0	0	0	0	0	0	0	0	0	0	0	0	0	0	0
35	Play	0	0	0	0	0	0	0	0	0	0	0	0	0	0	0	0	0	0	0	0	0	1	0	1	0	0
36	Play	1	0	0	0	1	0	0	0	0	0	0	0	0	1	1	1	0	0	0	0	0	0	0	0	0	0
37	Play	0	0	0	0	0	0	0	0	0	0	0	0	0	1	1	0	0	0	0	0	0	1	1	0	1	0
38	Play	1	0	0	0	1	0	0	0	0	1	0	0	0	1	1	0	0	0	0	0	0	0	0	0	0	0
39	Play	1	0	0	0	0	0	0	0	0	0	1	0	0	1	1	1	1	0	0	0	0	0	0	0	0	0
40	Play	0	0	0	0	0	0	0	0	0	0	0	0	0	0	0	0	0	0	0	0	0	0	0	0	0	0
41	Play	0	0	0	0	0	0	0	0	0	0	0	0	0	1	0	0	0	0	0	1	0	1	1	0	1	0
42	Play	1	0	0	0	1	0	0	0	0	0	0	0	0	1	0	1	0	0	0	0	0	1	0	0	1	1
43	Play	0	0	0	0	0	0	0	0	0	0	0	0	0	0	0	0	0	0	0	0	0	0	0	0	0	0
44	Play	0	0	0	0	0	0	0	0	0	0	0	0	0	1	0	1	0	1	0	0	0	0	0	0	0	0
45	Play	0	0	0	0	0	0	0	0	0	0	0	0	0	1	1	0	0	0	0	0	0	0	0	0	0	0
46	Play	0	0	0	0	0	0	0	0	0	0	0	0	0	1	1	0	0	0	0	0	0	0	0	0	0	0
47	Play	0	0	0	0	0	0	0	0	0	0	0	0	0	0	0	0	0	0	0	0	0	0	0	0	0	0
48	Play	0	0	0	0	0	0	0	0	0	0	0	0	0	0	0	0	0	0	0	0	0	0	0	0	0	0
49	Play	0	0	0	0	0	0	0	0	0	0	0	0	0	1	0	1	0	0	0	0	0	0	0	0	0	0
50	Play	0	0	0	0	0	0	0	0	0	0	0	0	0	0	0	0	0	0	0	0	0	0	0	0	0	0
51	Play	0	0	0	0	0	0	0	0	0	0	0	0	0	0	0	0	0	0	0	0	0	0	0	0	0	0
52	Play	1	0	0	1	1	0	0	0	0	0	1	0	0	1	1	0	0	0	0	0	0	1	0	1	0	1
53	Play	0	0	0	0	0	0	0	0	0	0	0	0	0	0	0	0	0	0	0	0	0	0	0	0	0	0
54	Play	0	0	0	0	0	0	0	0	0	0	0	0	0	0	0	0	0	0	0	0	0	0	0	0	0	0
55	Play	0	0	0	0	0	0	0	0	0	0	0	0	0	1	1	0	0	0	0	0	0	0	0	0	0	0
56	Play	1	0	0	1	0	0	0	0	0	0	0	0	0	1	0	0	0	1	0	0	0	0	0	0	0	0
57	Play	0	0	0	0	0	0	0	0	0	0	0	0	0	0	0	0	0	0	0	0	0	0	0	0	0	0
58	Play	0	0	0	0	0	0	0	0	0	0	0	0	0	0	0	0	0	0	0	0	0	0	0	0	0	0
59	Play	0	0	0	0	0	0	0	0	0	0	0	0	0	0	0	0	0	0	0	0	0	0	0	0	0	0
60	Play	1	0	0	0	1	0	0	0	0	0	0	0	0	0	0	0	0	0	0	0	0	0	0	0	0	0
61	Play	1	0	0	1	1	0	0	0	0	1	0	0	0	1	0	0	1	1	0	0	0	0	0	0	0	0
62	Play	0	0	0	0	0	0	0	0	0	0	0	0	0	0	0	0	0	0	0	0	0	0	0	0	0	0
63	Play	1	0	0	1	0	0	0	0	0	0	0	0	0	1	0	1	0	0	0	0	0	0	0	0	0	0
64	Play	1	0	0	0	1	0	0	0	0	1	0	0	0	0	0	0	0	0	0	0	0	0	0	0	0	0
65	Play	0	0	0	0	0	0	0	0	0	0	0	0	0	0	0	0	0	0	0	0	0	0	0	0	0	0
66	Play	1	0	0	0	0	0	0	0	0	1	0	0	0	1	0	0	0	1	0	0	0	0	0	0	0	0
67	Play	0	0	0	0	0	0	0	0	0	0	0	0	0	0	0	0	0	0	0	0	0	0	0	0	0	0
68	Play	0	0	0	0	0	0	0	0	0	0	0	0	0	0	0	0	0	0	0	0	0	1	0	1	0	0
69	Play	0	0	0	0	0	0	0	0	0	0	0	0	0	0	0	0	0	0	0	0	0	0	0	0	0	0
70	Play	0	0	0	0	0	0	0	0	0	0	0	0	0	1	1	0	0	0	0	0	0	0	0	0	0	0
71	Play	0	0	0	0	0	0	0	0	0	0	0	0	0	0	0	0	0	0	0	0	0	0	0	0	0	0
72	Play	0	0	0	0	0	0	0	0	0	0	0	0	0	0	0	0	0	0	0	0	0	0	0	0	0	0
73	Play	0	0	0	0	0	0	0	0	0	0	0	0	0	0	0	0	0	0	0	0	0	1	0	1	0	0
74	Play	1	0	0	1	0	0	0	0	0	0	0	0	0	0	0	0	0	0	0	0	0	1	0	0	1	0
75	Play	0	0	0	0	0	0	0	0	0	0	0	0	0	0	0	0	0	0	0	0	0	0	0	0	0	0
76	Play	0	0	0	0	0	0	0	0	0	0	0	0	0	0	0	0	0	0	0	0	0	0	0	0	0	0
77	Play	0	0	0	0	0	0	0	0	0	0	0	0	0	0	0	0	0	0	0	0	0	0	0	0	0	0
78	Play	1	0	0	0	1	1	0	1	0	0	0	0	0	1	1	0	0	0	0	0	0	0	0	0	0	0
79	Play	0	0	0	0	0	0	0	0	0	0	0	0	0	0	0	0	0	0	0	0	0	0	0	0	0	0
80	Play	0	0	0	0	0	0	0	0	0	0	0	0	0	0	0	0	0	0	0	0	0	0	0	0	0	0
81	Play	1	0	0	0	0	0	0	1	0	0	0	0	0	0	0	0	0	0	0	0	0	0	0	0	0	0
82	Play	1	0	0	1	1	0	0	0	0	0	1	0	0	1	1	1	0	0	0	0	0	1	0	0	1	0
83	Play	0	0	0	0	0	0	0	0	0	0	0	0	0	0	0	0	0	0	0	0	0	0	0	0	0	0
84	Play	1	0	0	0	1	0	0	0	0	0	0	0	0	0	0	0	0	0	0	0	0	0	0	0	0	0
85	Play	0	0	0	0	0	0	0	0	0	0	0	0	0	0	0	0	0	0	0	0	0	0	0	0	0	0
86	Play	0	0	0	0	0	0	0	0	0	0	0	0	0	0	0	0	0	0	0	0	0	0	0	0	0	0
87	Play	1	0	0	0	0	1	0	1	0	0	0	0	0	0	0	0	0	0	0	0	0	1	0	1	0	0
88	Play	0	0	0	0	0	0	0	0	0	0	0	0	0	0	0	0	0	0	0	0	0	0	0	0	0	0
89	Play	0	0	0	0	0	0	0	0	0	0	0	0	0	1	1	0	0	0	0	0	0	1	0	1	0	0
90	Play	0	0	0	0	0	0	0	0	0	0	0	0	0	1	0	0	1	0	0	0	0	1	0	1	0	0
91	Play	1	0	0	0	1	0	0	0	0	0	0	0	0	1	1	0	0	0	0	0	0	1	0	1	0	0
92	Play	0	0	0	0	0	0	0	0	0	0	0	0	0	0	0	0	0	0	0	0	0	0	0	0	0	0
93	Play	1	0	0	0	1	0	0	0	0	0	0	0	0	1	1	0	0	0	0	0	0	1	0	0	1	1
94	Play	1	0	0	0	1	0	0	0	0	0	0	0	0	1	1	1	0	0	0	0	0	1	0	0	1	0
95	Play	0	0	0	0	0	0	0	0	0	0	0	0	0	1	0	0	0	1	0	0	0	0	0	0	0	0
258	Play	1	0	1	0	0	1	0	1	0	0	1	0	0	1	0	0	1	1	0	0	0	0	0	0	0	0
259	Play	0	0	0	0	0	0	0	0	0	0	0	0	0	0	0	0	0	0	0	0	0	0	0	0	0	0
260	Play	1	0	1	0	0	0	0	0	0	0	0	0	0	0	0	0	0	0	0	0	0	0	0	0	0	0
261	Play	0	0	0	0	0	0	0	0	0	0	0	0	0	0	0	0	0	0	0	0	0	0	0	0	0	0
263	Play	1	0	1	0	0	0	0	0	0	0	1	0	0	1	0	0	1	0	0	0	0	0	0	0	0	0
267	Play	1	0	1	1	1	1	1	0	1	0	0	1	1	1	0	1	0	1	0	0	0	1	0	1	0	0
326	Play	1	0	0	0	1	0	0	0	0	0	0	0	0	1	1	1	0	1	0	0	0	0	0	0	0	0
353	Play	1	0	0	0	1	0	0	0	0	1	0	0	0	1	1	0	0	1	0	0	0	1	1	0	0	1
354	Play	0	0	0	0	0	0	0	0	0	0	0	0	0	1	1	0	0	0	0	0	0	0	0	0	0	0
355	Play	0	0	0	0	0	0	0	0	0	0	0	0	0	1	0	0	0	1	0	0	0	1	1	0	0	0
356	Play	0	0	0	0	0	0	0	0	0	0	0	0	0	1	1	0	0	0	0	0	0	0	0	0	0	0
357	Play	0	0	0	0	0	0	0	0	0	0	0	0	0	1	0	0	0	1	0	0	0	0	0	0	0	0
358	Play	1	0	0	1	1	0	0	0	0	0	1	0	1	1	1	1	0	0	0	0	0	0	0	0	0	0
359	Play	0	0	0	0	0	0	0	0	0	0	0	0	0	0	0	0	0	0	0	0	0	0	0	0	0	0
360	Play	1	0	0	0	1	0	0	0	0	0	0	0	0	1	1	1	0	0	0	0	0	0	0	0	0	0
361	Play	0	0	0	0	0	0	0	0	0	0	0	0	0	0	0	0	0	0	0	0	0	0	0	0	0	0
362	Play	1	0	0	1	1	0	0	0	0	0	0	0	0	1	1	0	0	0	0	0	0	0	0	0	0	0
363	Play	1	0	0	0	1	0	0	0	0	0	0	0	0	1	1	0	0	1	0	0	0	0	0	0	0	0
364	Play	0	0	0	0	0	0	0	0	0	0	0	0	0	0	0	0	0	0	0	0	0	0	0	0	0	0
365	Play	1	0	0	0	1	0	0	0	0	0	0	0	0	0	0	0	0	0	0	0	0	0	0	0	0	0
366	Play	1	0	0	1	1	0	0	0	0	0	0	0	0	1	1	1	1	0	0	0	0	0	0	0	0	0
367	Play	0	0	0	0	0	0	0	0	0	0	0	0	0	0	0	0	0	0	0	0	0	0	0	0	0	0
368	Play	0	0	0	0	0	0	0	0	0	0	0	0	0	0	0	0	0	0	0	0	0	0	0	0	0	0
369	Play	0	0	0	0	0	0	0	0	0	0	0	0	0	0	0	0	0	0	0	0	0	0	0	0	0	0
370	Play	0	0	0	0	0	0	0	0	0	0	0	0	0	0	0	0	0	0	0	0	0	1	1	0	1	0
371	Play	0	0	0	0	0	0	0	0	0	0	0	0	0	0	0	0	0	0	0	0	0	0	0	0	0	0
372	Play	1	0	0	0	1	0	0	0	0	0	0	0	0	1	1	0	0	0	0	0	0	0	0	0	0	0
373	Play	0	0	0	0	0	0	0	0	0	0	0	0	0	1	1	0	0	0	0	0	0	0	0	0	0	0
374	Play	0	0	0	0	0	0	0	0	0	0	0	0	0	0	0	0	0	0	0	0	0	0	0	0	0	0
2	Milestone	0	0	0	0	0	0	0	0	0	0	0	0	0	1	0	1	0	0	0	0	0	0	0	0	0	0
96	Milestone	0	0	0	0	0	0	0	0	0	0	0	0	0	0	0	0	0	0	0	0	0	0	0	0	0	0
97	Milestone	0	0	0	0	0	0	0	0	0	0	0	0	0	0	0	0	0	0	0	0	0	0	0	0	0	0
98	Milestone	1	0	1	0	0	0	0	0	0	0	0	0	0	0	0	0	0	0	0	0	0	0	0	0	0	0
99	Milestone	0	0	0	0	0	0	0	0	0	0	0	0	0	0	0	0	0	0	0	0	0	0	0	0	0	0
100	Milestone	1	0	0	0	0	0	0	0	0	0	1	0	0	1	0	0	0	0	1	0	0	0	0	0	0	0
101	Milestone	1	0	0	1	1	0	1	0	0	0	0	0	0	1	1	0	0	0	0	0	0	0	0	0	0	0
105	Milestone	1	0	1	0	0	0	0	0	0	1	0	0	0	1	1	0	0	1	0	0	0	1	0	1	1	0
109	Milestone	1	1	0	0	0	0	0	0	0	0	0	0	0	0	0	0	0	0	0	0	0	0	0	0	0	0
110	Milestone	0	0	0	0	0	0	0	0	0	0	0	0	0	0	0	0	0	0	0	0	0	0	0	0	0	0
111	Milestone	0	0	0	0	0	0	0	0	0	0	0	0	0	1	1	0	0	0	0	0	0	0	0	0	0	0
112	Milestone	0	0	0	0	0	0	0	0	0	0	0	0	0	0	0	0	0	0	0	0	0	0	0	0	0	0
113	Milestone	1	0	0	0	0	0	0	0	0	1	0	0	0	0	0	0	0	0	0	0	0	1	1	0	1	0
115	Milestone	1	0	1	0	0	0	0	0	0	0	0	0	0	0	0	0	0	0	0	0	0	0	0	0	0	0
116	Milestone	1	1	0	0	0	0	0	0	0	0	0	0	0	0	0	0	0	0	0	0	0	0	0	0	0	0
117	Milestone	1	0	1	0	0	0	0	0	0	0	0	0	0	0	0	0	0	0	0	0	0	0	0	0	0	0
118	Milestone	0	0	0	0	0	0	0	0	0	0	0	0	0	0	0	0	0	0	0	0	0	0	0	0	0	0
119	Milestone	0	0	0	0	0	0	0	0	0	0	0	0	0	0	0	0	0	0	0	0	0	0	0	0	0	0
120	Milestone	1	0	1	0	0	0	0	0	0	0	0	0	0	1	0	0	0	1	0	0	0	0	0	0	0	0
121	Milestone	1	0	1	0	0	0	0	0	0	0	0	0	0	1	1	0	0	0	0	0	0	0	0	0	0	0
122	Milestone	0	0	0	0	0	0	0	0	0	0	0	0	0	0	0	0	0	0	0	0	0	0	0	0	0	0
123	Milestone	1	0	1	0	0	0	0	0	0	0	0	0	0	1	0	0	0	0	1	0	0	0	0	0	0	0
124	Milestone	0	0	0	0	0	0	0	0	0	0	0	0	0	0	0	0	0	0	0	0	0	0	0	0	0	0
125	Milestone	0	0	0	0	0	0	0	0	0	0	0	0	0	0	0	0	0	0	0	0	0	0	0	0	0	0
126	Milestone	1	0	1	0	0	0	0	0	1	0	0	1	0	1	0	0	0	0	1	0	0	0	0	0	0	0
127	Milestone	1	0	0	0	0	0	0	0	0	1	0	0	0	1	1	1	1	1	1	0	0	0	0	0	0	0
128	Milestone	0	0	0	0	0	0	0	0	0	0	0	0	0	0	0	0	0	0	0	0	0	0	0	0	0	0
129	Milestone	0	0	0	0	0	0	0	0	0	0	0	0	0	0	0	0	0	0	0	0	0	0	0	0	0	0
130	Milestone	0	0	0	0	0	0	0	0	0	0	0	0	0	0	0	0	0	0	0	0	0	0	0	0	0	0
131	Milestone	0	0	0	0	0	0	0	0	0	0	0	0	0	0	0	0	0	0	0	0	0	0	0	0	0	0
132	Milestone	1	0	1	0	1	0	0	0	0	0	0	0	0	1	1	0	1	0	0	0	0	0	0	0	0	0
133	Milestone	1	0	0	0	1	0	0	1	0	0	0	0	0	1	1	1	1	1	0	0	0	1	0	1	0	0
146	Milestone	0	0	0	0	0	0	0	0	0	0	0	0	0	0	0	0	0	0	0	0	0	0	0	0	0	0
147	Milestone	1	0	1	0	0	0	0	0	0	0	0	0	0	0	0	0	0	0	0	0	0	0	0	0	0	0
148	Milestone	0	0	0	0	0	0	0	0	0	0	0	0	0	0	0	0	0	0	0	0	0	0	0	0	0	0
149	Milestone	1	0	0	0	0	0	0	0	0	0	1	0	0	1	0	1	1	0	0	0	0	0	0	0	0	0
150	Milestone	1	0	0	0	0	0	0	0	0	0	1	0	0	0	0	0	0	0	0	0	0	0	0	0	0	0
151	Milestone	0	0	0	0	0	0	0	0	0	0	0	0	0	0	0	0	0	0	0	0	0	0	0	0	0	0
152	Milestone	0	0	0	0	0	0	0	0	0	0	0	0	0	0	0	0	0	0	0	0	0	0	0	0	0	0
153	Milestone	1	0	0	1	0	0	0	0	0	0	0	0	0	1	0	0	0	0	1	0	0	0	0	0	0	0
154	Milestone	0	0	0	0	0	0	0	0	0	0	0	0	0	1	0	0	0	0	1	0	0	0	0	0	0	0
155	Milestone	0	0	0	0	0	0	0	0	0	0	0	0	0	0	0	0	0	0	0	0	0	0	0	0	0	0
156	Milestone	0	0	0	0	0	0	0	0	0	0	0	0	0	0	0	0	0	0	0	0	0	0	0	0	0	0
157	Milestone	0	0	0	0	0	0	0	0	0	0	0	0	0	0	0	0	0	0	0	0	0	0	0	0	0	0
158	Milestone	0	0	0	0	0	0	0	0	0	0	0	0	0	1	0	0	0	0	1	0	0	0	0	0	0	0
159	Milestone	0	0	0	0	0	0	0	0	0	0	0	0	0	0	0	0	0	0	0	0	0	0	0	0	0	0
160	Milestone	1	0	1	0	0	0	0	0	0	0	0	0	0	1	1	0	1	0	0	0	0	0	0	0	0	0
161	Milestone	1	0	1	0	0	0	0	0	0	0	0	0	0	0	0	0	0	0	0	0	0	0	0	0	0	0
162	Milestone	1	1	0	0	0	0	0	0	0	0	0	0	0	0	0	0	0	0	0	0	0	0	0	0	0	0
163	Milestone	1	0	1	0	0	0	0	0	0	0	1	0	0	1	0	0	0	0	1	0	0	0	0	0	0	0
164	Milestone	0	0	0	0	0	0	0	0	0	0	0	0	0	0	0	0	0	0	0	0	0	0	0	0	0	0
165	Milestone	0	0	0	0	0	0	0	0	0	0	0	0	0	0	0	0	0	0	0	0	0	0	0	0	0	0
166	Milestone	0	0	0	0	0	0	0	0	0	0	0	0	0	0	0	0	0	0	0	0	0	0	0	0	0	0
167	Milestone	1	1	0	0	0	0	1	0	0	0	0	1	0	1	1	0	0	0	1	0	0	0	0	0	0	0
168	Milestone	1	1	0	0	0	0	0	0	0	0	0	0	0	1	1	0	0	0	0	0	0	0	0	0	0	0
169	Milestone	1	0	0	1	0	0	0	0	0	0	0	0	0	1	0	0	0	1	0	0	0	0	0	0	0	0
170	Milestone	0	0	0	0	0	0	0	0	0	0	0	0	0	0	0	0	0	0	0	0	0	0	0	0	0	0
171	Milestone	1	0	1	0	0	0	0	0	0	0	0	1	0	0	0	0	0	0	0	0	0	0	0	0	0	0
172	Milestone	1	0	1	0	0	0	0	0	0	0	0	0	0	1	0	0	0	0	1	0	0	0	0	0	0	0
173	Milestone	1	0	1	0	0	0	0	0	0	0	0	0	0	1	0	0	0	0	1	0	0	0	0	0	0	0
174	Milestone	0	0	0	0	0	0	0	0	0	0	0	0	0	1	0	0	0	0	1	0	0	0	0	0	0	0
175	Milestone	1	0	1	0	0	0	0	0	0	0	0	0	0	1	0	0	0	0	1	0	0	0	0	0	0	0
176	Milestone	1	0	1	0	0	0	0	0	0	0	0	0	0	0	0	0	0	0	0	0	0	0	0	0	0	0
177	Milestone	1	0	1	1	0	0	0	0	0	0	0	0	0	1	0	1	1	1	1	0	0	0	0	0	0	0
178	Milestone	1	0	1	0	0	0	0	0	0	0	0	0	0	0	0	0	0	0	0	0	0	0	0	0	0	0
179	Milestone	1	0	0	1	0	0	1	0	0	0	0	0	0	1	1	1	0	0	0	0	0	0	0	0	0	0
180	Milestone	1	1	1	0	0	0	0	0	0	0	0	0	0	1	1	0	0	0	0	0	0	0	0	0	0	0
181	Milestone	1	0	1	0	0	0	1	0	0	1	1	0	0	1	1	0	0	1	0	0	0	0	0	0	0	0
191	Milestone	0	0	0	0	0	0	0	0	0	0	0	0	0	0	0	0	0	0	0	0	0	0	0	0	0	0
192	Milestone	0	0	0	0	0	0	0	0	0	0	0	0	0	0	0	0	0	0	0	0	0	0	0	0	0	0
193	Milestone	0	0	0	0	0	0	0	0	0	0	0	0	0	0	0	0	0	0	0	0	0	0	0	0	0	0
194	Milestone	1	0	1	0	0	0	0	0	0	0	0	0	0	0	0	0	0	0	0	0	0	0	0	0	0	0
195	Milestone	0	0	0	0	0	0	0	0	0	0	0	0	0	0	0	0	0	0	0	0	0	0	0	0	0	0
197	Milestone	1	1	0	0	0	0	0	0	0	0	0	0	0	1	1	0	0	0	0	0	0	0	0	0	0	0
198	Milestone	0	0	0	0	0	0	0	0	0	0	0	0	0	1	0	1	0	0	0	0	0	0	0	0	0	0
199	Milestone	1	0	0	0	0	0	0	0	1	1	0	0	0	1	1	0	1	1	0	0	0	1	1	0	1	1
200	Milestone	1	1	0	0	0	1	0	0	0	0	0	0	0	1	1	1	0	1	0	0	0	0	0	0	0	0
201	Milestone	0	0	0	0	0	0	0	0	0	0	0	0	0	0	0	0	0	0	0	0	0	0	0	0	0	0
202	Milestone	0	0	0	0	0	0	0	0	0	0	0	0	0	0	0	0	0	0	0	0	0	0	0	0	0	0
203	Milestone	0	0	0	0	0	0	0	0	0	0	0	0	0	1	1	0	1	1	1	0	0	0	0	0	0	0
208	Milestone	1	1	1	0	0	0	1	0	0	0	1	0	0	1	1	0	1	0	1	0	0	0	0	0	0	0
209	Milestone	0	0	0	0	0	0	0	0	0	0	0	0	0	1	0	1	0	0	0	0	0	0	0	0	0	0
210	Milestone	1	0	1	0	0	0	0	0	0	0	0	0	0	1	0	0	0	0	1	0	0	0	0	0	0	0
211	Milestone	1	0	1	0	0	0	0	0	0	0	0	0	0	0	0	0	0	0	0	0	0	0	0	0	0	0
212	Milestone	1	1	0	0	0	0	0	0	0	0	0	0	0	1	1	0	0	0	1	0	0	0	0	0	0	0
214	Milestone	0	0	0	0	0	0	0	0	0	0	0	0	0	1	0	0	0	0	1	0	0	0	0	0	0	0
215	Milestone	1	0	0	0	1	0	0	0	0	0	0	0	1	1	1	1	1	0	0	0	0	1	0	0	1	1
216	Milestone	1	0	1	0	0	0	0	0	0	1	0	0	1	1	1	1	0	0	0	0	0	1	1	0	1	1
220	Milestone	0	0	0	0	0	0	0	0	0	0	0	0	0	0	0	0	0	0	0	0	0	0	0	0	0	0
221	Milestone	1	0	1	0	0	0	0	0	0	0	0	0	0	0	0	0	0	0	0	0	0	0	0	0	0	0
222	Milestone	1	0	1	1	0	0	0	0	0	0	0	0	0	1	1	1	0	1	1	0	0	1	0	0	1	1
234	Milestone	1	0	1	0	0	0	0	0	0	0	0	0	0	0	0	0	0	0	0	0	0	0	0	0	0	0
235	Milestone	0	0	0	0	0	0	0	0	0	0	0	0	0	0	0	0	0	0	0	0	0	0	0	0	0	0
236	Milestone	0	0	0	0	0	0	0	0	0	0	0	0	0	1	0	0	1	0	0	0	0	0	0	0	0	0
237	Milestone	1	0	0	0	0	0	0	0	0	0	0	1	0	0	0	0	0	0	0	0	0	0	0	0	0	0
238	Milestone	1	0	1	0	0	0	0	0	0	0	0	0	0	0	0	0	0	0	0	0	0	0	0	0	0	0
239	Milestone	1	0	1	0	0	0	0	0	0	0	1	0	0	0	0	0	0	0	0	0	0	0	0	0	0	0
240	Milestone	0	0	0	0	0	0	0	0	0	0	0	0	0	0	0	0	0	0	0	0	0	0	0	0	0	0
241	Milestone	1	0	0	0	0	0	0	0	0	0	0	1	0	0	0	0	0	0	0	0	0	0	0	0	0	0
242	Milestone	1	0	1	0	0	0	0	0	0	0	0	0	0	1	1	0	0	0	1	0	0	0	0	0	0	0
243	Milestone	0	0	0	0	0	0	0	0	0	0	0	0	0	1	1	0	0	0	0	0	0	1	0	1	0	0
244	Milestone	0	0	0	0	0	0	0	0	0	0	0	0	0	0	0	0	0	0	0	0	0	0	0	0	0	0
245	Milestone	0	0	0	0	0	0	0	0	0	0	0	0	0	0	0	0	0	0	0	0	0	0	0	0	0	0
246	Milestone	1	0	0	1	0	0	0	0	0	0	1	0	0	1	0	1	1	0	0	0	0	0	0	0	0	0
247	Milestone	1	0	0	0	1	0	0	0	0	0	0	0	0	1	1	0	0	0	0	0	0	0	0	0	0	0
248	Milestone	0	0	0	0	0	0	0	0	0	0	0	0	0	0	0	0	0	0	0	0	0	1	0	0	0	1
249	Milestone	0	0	0	0	0	0	0	0	0	0	0	0	0	0	0	0	0	0	0	0	0	0	0	0	0	0
252	Milestone	0	0	0	0	0	0	0	0	0	0	0	0	0	0	0	0	0	0	0	0	0	0	0	0	0	0
253	Milestone	1	0	1	0	0	0	0	0	0	1	0	0	0	1	0	0	0	0	1	0	0	0	0	0	0	0
254	Milestone	0	0	0	0	0	0	0	0	0	0	0	0	0	1	0	0	0	0	1	0	0	0	0	0	0	0
257	Milestone	1	0	1	1	1	0	0	1	1	1	0	0	0	1	1	1	1	1	0	0	0	1	0	1	1	0
258	Milestone	1	0	1	0	0	0	0	1	0	0	0	1	0	1	0	0	1	1	1	0	0	0	0	0	0	0
259	Milestone	0	0	0	0	0	0	0	0	0	0	0	0	0	0	0	0	0	0	0	0	0	0	0	0	0	0
260	Milestone	1	0	1	0	0	0	0	0	0	0	0	0	0	0	0	0	0	0	0	0	0	0	0	0	0	0
261	Milestone	0	0	0	0	0	0	0	0	0	0	0	0	0	0	0	0	0	0	0	0	0	0	0	0	0	0
268	Milestone	0	0	0	0	0	0	0	0	0	0	0	0	0	0	0	0	0	0	0	0	0	0	0	0	0	0
335	Milestone	0	0	0	0	0	0	0	0	0	0	0	0	0	0	0	0	0	0	0	0	0	0	0	0	0	0
339	Milestone	0	0	0	0	0	0	0	0	0	0	0	0	0	0	0	0	0	0	0	0	0	0	0	0	0	0
345	Milestone	0	0	0	0	0	0	0	0	0	0	0	0	0	0	0	0	0	0	0	0	0	0	0	0	0	0
346	Milestone	0	0	0	0	0	0	0	0	0	0	0	0	0	0	0	0	0	0	0	0	0	0	0	0	0	0
347	Milestone	0	0	0	0	0	0	0	0	0	0	0	0	0	0	0	0	0	0	0	0	0	0	0	0	0	0
348	Milestone	0	0	0	0	0	0	0	0	0	0	0	0	0	0	0	0	0	0	0	0	0	0	0	0	0	0
349	Milestone	0	0	0	0	0	0	0	0	0	0	0	0	0	1	1	0	0	0	0	0	0	0	0	0	0	0
350	Milestone	0	0	0	0	0	0	0	0	0	0	0	0	0	0	0	0	0	0	0	0	0	0	0	0	0	0
351	Milestone	0	0	0	0	0	0	0	0	0	0	0	0	0	0	0	0	0	0	0	0	0	0	0	0	0	0
352	Milestone	1	0	1	0	0	0	0	0	0	0	0	0	0	0	0	0	0	0	0	0	0	0	0	0	0	0
97	Development	1	0	0	0	0	0	1	0	0	0	0	0	0	0	0	0	0	0	0	0	0	0	0	0	0	0
98	Development	1	0	1	0	0	0	0	0	0	0	0	0	0	0	0	0	0	0	0	0	0	0	0	0	0	0
99	Development	0	0	0	0	0	0	0	0	0	0	0	0	0	0	0	0	0	0	0	0	0	0	0	0	0	0
100	Development	0	0	0	0	0	0	0	0	0	0	0	0	0	0	0	0	0	0	0	0	0	0	0	0	0	0
101	Development	1	0	0	1	0	0	1	0	0	0	1	0	0	1	1	0	0	0	1	0	0	0	0	0	0	0
109	Development	1	1	0	0	0	0	0	0	0	0	0	0	0	0	0	0	0	0	0	0	0	0	0	0	0	0
113	Development	1	0	0	0	0	0	0	0	0	1	0	0	0	0	0	0	0	0	0	0	0	1	1	0	1	0
115	Development	1	0	1	0	0	0	0	0	0	0	0	0	0	0	0	0	0	0	0	0	0	0	0	0	0	0
116	Development	1	1	0	0	0	0	0	0	0	0	0	0	0	0	0	0	0	0	0	0	0	0	0	0	0	0
119	Development	0	0	0	0	0	0	0	0	0	0	0	0	0	0	0	0	0	0	0	0	0	0	0	0	0	0
120	Development	1	0	1	0	0	0	0	0	0	1	0	0	0	0	0	0	0	0	0	0	0	0	0	0	0	0
121	Development	1	0	1	0	0	0	0	0	0	0	0	0	0	0	0	0	0	0	0	0	0	0	0	0	0	0
129	Development	0	0	0	0	0	0	0	0	0	0	0	0	0	0	0	0	0	0	0	0	0	0	0	0	0	0
130	Development	0	0	0	0	0	0	0	0	0	0	0	0	0	0	0	0	0	0	0	0	0	0	0	0	0	0
132	Development	1	0	1	0	0	0	0	0	0	0	0	0	0	1	1	0	1	0	0	0	0	0	0	0	0	0
133	Development	1	0	0	1	1	0	0	1	0	1	0	1	0	1	1	1	1	1	0	0	0	1	0	1	0	0
154	Development	0	0	0	0	0	0	0	0	0	0	0	0	0	1	0	0	0	0	1	0	0	0	0	0	0	0
156	Development	0	0	0	0	0	0	0	0	0	0	0	0	0	0	0	0	0	0	0	0	0	0	0	0	0	0
157	Development	0	0	0	0	0	0	0	0	0	0	0	0	0	0	0	0	0	0	0	0	0	0	0	0	0	0
166	Development	0	0	0	0	0	0	0	0	0	0	0	0	0	0	0	0	0	0	0	0	0	0	0	0	0	0
167	Development	1	1	0	0	0	0	1	0	0	0	0	1	0	1	1	0	0	0	1	0	0	0	0	0	0	0
173	Development	1	0	1	0	0	0	0	0	0	0	0	0	0	1	0	0	0	0	1	0	0	0	0	0	0	0
179	Development	1	0	0	1	0	0	1	0	0	0	0	0	0	1	1	1	0	0	0	0	0	0	0	0	0	0
195	Development	0	0	0	0	0	0	0	0	0	0	0	0	0	0	0	0	0	0	0	0	0	0	0	0	0	0
199	Development	1	0	0	0	1	0	0	0	1	1	0	0	0	1	1	0	0	1	0	0	0	1	1	0	1	1
201	Development	0	0	0	0	0	0	0	0	0	0	0	0	0	0	0	0	0	0	0	0	0	0	0	0	0	0
202	Development	0	0	0	0	0	0	0	0	0	0	0	0	0	0	0	0	0	0	0	0	0	0	0	0	0	0
209	Development	0	0	0	0	0	0	0	0	0	0	0	0	0	1	0	1	0	0	0	0	0	0	0	0	0	0
220	Development	0	0	0	0	0	0	0	0	0	0	0	0	0	0	0	0	0	0	0	0	0	0	0	0	0	0
246	Development	0	0	0	0	0	0	0	0	0	0	0	0	0	1	0	1	1	0	0	0	0	0	0	0	0	0
248	Development	0	0	0	0	0	0	0	0	0	0	0	0	0	0	0	0	0	0	0	0	0	1	0	0	0	1
249	Development	0	0	0	0	0	0	0	0	0	0	0	0	0	0	0	0	0	0	0	0	0	0	0	0	0	0
252	Development	0	0	0	0	0	0	0	0	0	0	0	0	0	0	0	0	0	0	0	0	0	0	0	0	0	0
253	Development	1	0	1	0	0	0	0	0	0	1	0	0	0	1	0	0	0	0	1	0	0	0	0	0	0	0
254	Development	0	0	0	0	0	0	0	0	0	0	0	0	0	1	0	0	0	0	1	0	0	0	0	0	0	0
257	Development	1	0	1	1	1	0	0	1	1	1	0	0	0	1	1	1	1	1	0	0	0	1	0	1	1	0
258	Development	1	0	1	0	0	1	0	1	0	0	1	0	0	1	0	0	1	1	1	0	0	0	0	0	0	0
259	Development	0	0	0	0	0	0	0	0	0	0	0	0	0	0	0	0	0	0	0	0	0	0	0	0	0	0
260	Development	1	0	1	0	0	0	0	0	0	0	0	0	0	0	0	0	0	0	0	0	0	0	0	0	0	0
261	Development	0	0	0	0	0	0	0	0	0	0	0	0	0	0	0	0	0	0	0	0	0	0	0	0	0	0
262	Development	1	0	0	1	1	0	0	0	0	0	0	0	0	1	1	0	0	0	0	0	0	0	0	0	0	0
268	Development	0	0	0	0	0	0	0	0	0	0	0	0	0	0	0	0	0	0	0	0	0	0	0	0	0	0
270	Development	1	0	0	0	0	0	0	0	0	0	1	0	0	0	0	0	0	0	0	0	0	0	0	0	0	0
271	Development	0	0	0	0	0	0	0	0	0	0	0	0	0	0	0	0	0	0	0	0	0	0	0	0	0	0
272	Development	0	0	0	0	0	0	0	0	0	0	0	0	0	0	0	0	0	0	0	0	0	0	0	0	0	0
273	Development	0	0	0	0	0	0	0	0	0	0	0	0	0	0	0	0	0	0	0	0	0	0	0	0	0	0
274	Development	0	0	0	0	0	0	0	0	0	0	0	0	0	1	1	1	0	1	0	0	0	0	0	0	0	0
275	Development	1	0	0	1	0	0	0	0	0	0	0	0	0	1	1	0	0	0	0	0	0	0	0	0	0	0
276	Development	1	0	0	0	1	0	0	0	0	0	0	0	0	1	0	0	0	1	0	0	0	0	0	0	0	0
277	Development	0	0	0	0	0	0	0	0	0	0	0	0	0	0	0	0	0	0	0	0	0	0	0	0	0	0
278	Development	0	0	0	0	0	0	0	0	0	0	0	0	0	0	0	0	0	0	0	0	0	0	0	0	0	0
279	Development	0	0	0	0	0	0	0	0	0	0	0	0	0	1	1	1	0	0	0	0	0	0	0	0	0	0
280	Development	0	0	0	0	0	0	0	0	0	0	0	0	0	0	0	0	0	0	0	0	0	0	0	0	0	0
281	Development	0	0	0	0	0	0	0	0	0	0	0	0	0	0	0	0	0	0	0	0	0	0	0	0	0	0
282	Development	1	0	0	0	1	0	0	0	0	0	0	0	0	1	1	0	0	0	0	0	0	0	0	0	0	0
283	Development	0	0	0	0	0	0	0	0	0	0	0	0	0	1	0	1	0	0	0	0	0	0	0	0	0	0
284	Development	0	0	0	0	0	0	0	0	0	0	0	0	0	0	0	0	0	0	0	0	0	0	0	0	0	0
285	Development	0	0	0	0	0	0	0	0	0	0	0	0	0	0	0	0	0	0	0	0	0	0	0	0	0	0
286	Development	0	0	0	0	0	0	0	0	0	0	0	0	0	1	0	1	0	0	0	0	0	0	0	0	0	0
287	Development	1	0	1	0	0	0	0	0	0	1	0	0	0	1	1	1	0	1	0	0	0	0	0	0	0	0
288	Development	0	0	0	0	0	0	0	0	0	0	0	0	0	0	0	0	0	0	0	0	0	0	0	0	0	0
289	Development	0	0	0	0	0	0	0	0	0	0	0	0	0	0	0	0	0	0	0	0	0	0	0	0	0	0
290	Development	1	1	0	0	0	0	0	0	0	0	0	0	0	0	0	0	0	0	0	0	0	0	0	0	0	0
291	Development	0	0	0	0	0	0	0	0	0	0	0	0	0	0	0	0	0	0	0	0	0	0	0	0	0	0
292	Development	1	0	0	1	0	0	0	0	0	0	0	0	0	1	1	1	0	0	0	0	1	1	1	0	1	0
293	Development	0	0	0	0	0	0	0	0	0	0	0	0	0	0	0	0	0	0	0	0	0	0	0	0	0	0
294	Development	1	0	0	1	0	0	0	0	0	0	0	0	0	1	0	1	0	0	0	0	0	0	0	0	0	0
295	Development	1	0	0	0	1	0	0	0	0	0	0	0	0	1	1	0	0	1	0	0	0	1	0	1	0	0
296	Development	1	1	0	0	0	0	0	0	0	0	0	0	0	0	0	0	0	0	0	0	0	0	0	0	0	0
297	Development	1	0	1	0	0	0	0	0	0	0	0	0	0	0	0	0	0	0	0	0	0	0	0	0	0	0
298	Development	1	0	1	0	1	0	0	0	0	0	0	0	0	1	1	0	0	1	0	0	0	0	0	0	0	0
299	Development	0	0	0	0	0	0	0	0	0	0	0	0	0	1	0	1	0	0	0	0	0	1	0	0	0	1
300	Development	0	0	0	0	0	0	0	0	0	0	0	0	0	0	0	0	0	0	0	0	0	0	0	0	0	0
301	Development	0	0	0	0	0	0	0	0	0	0	0	0	0	0	0	0	0	0	0	0	0	0	0	0	0	0
302	Development	0	0	0	0	0	0	0	0	0	0	0	0	0	0	0	0	0	0	0	0	0	0	0	0	0	0
303	Development	0	0	0	0	0	0	0	0	0	0	0	0	0	0	0	0	0	0	0	0	0	0	0	0	0	0
304	Development	0	0	0	0	0	0	0	0	0	0	0	0	0	0	0	0	0	0	0	0	0	0	0	0	0	0
305	Development	1	0	0	1	0	0	0	0	0	0	0	0	1	0	0	0	0	0	0	0	0	0	0	0	0	0
306	Development	0	0	0	0	0	0	0	0	0	0	0	0	0	1	1	0	0	0	0	0	0	0	0	0	0	0
307	Development	1	0	0	1	0	0	0	0	0	0	1	0	0	1	0	1	0	0	0	0	0	0	0	0	0	0
308	Development	0	0	0	0	0	0	0	0	0	0	0	0	0	0	0	0	0	0	0	0	0	0	0	0	0	0
309	Development	0	0	0	0	0	0	0	0	0	0	0	0	0	0	0	0	0	0	0	0	0	0	0	0	0	0
310	Development	0	0	0	0	0	0	0	0	0	0	0	0	0	0	0	0	0	0	0	0	0	0	0	0	0	0
311	Development	0	0	0	0	0	0	0	0	0	0	0	0	0	0	0	0	0	0	0	0	0	0	0	0	0	0
312	Development	0	0	0	0	0	0	0	0	0	0	0	0	0	1	1	1	1	0	1	0	0	0	0	0	0	0
314	Development	0	0	0	0	0	0	0	0	0	0	0	0	0	0	0	0	0	0	0	0	0	0	0	0	0	0
315	Development	0	0	0	0	0	0	0	0	0	0	0	0	0	0	0	0	0	0	0	0	0	0	0	0	0	0
316	Development	0	0	0	0	0	0	0	0	0	0	0	0	0	0	0	0	0	0	0	0	0	0	0	0	0	0
317	Development	1	0	0	0	0	0	0	0	0	0	1	0	0	1	0	1	0	1	0	0	0	0	0	0	0	0
318	Development	0	0	0	0	0	0	0	0	0	0	0	0	0	0	0	0	0	0	0	0	0	0	0	0	0	0
319	Development	0	0	0	0	0	0	0	0	0	0	0	0	0	0	0	0	0	0	0	0	0	0	0	0	0	0
320	Development	0	0	0	0	0	0	0	0	0	0	0	0	0	0	0	0	0	0	0	0	0	0	0	0	0	0
321	Development	0	0	0	0	0	0	0	0	0	0	0	0	0	0	0	0	0	0	0	0	0	0	0	0	0	0
322	Development	1	0	0	1	0	0	0	0	0	0	0	0	0	1	0	0	0	0	1	0	0	0	0	0	0	0
323	Development	1	0	0	1	0	0	0	0	0	0	0	0	0	0	0	0	0	0	0	0	0	0	0	0	0	0
324	Development	0	0	0	0	0	0	0	0	0	0	0	0	0	1	1	0	0	0	0	0	0	0	0	0	0	0
325	Development	0	0	0	0	0	0	0	0	0	0	0	0	0	0	0	0	0	0	0	0	0	0	0	0	0	0
330	Development	1	0	0	0	0	0	1	0	0	0	0	0	0	0	0	0	0	0	0	0	0	0	0	0	0	0
331	Development	0	0	0	0	0	0	0	0	0	0	0	0	0	1	1	0	0	1	0	0	0	0	0	0	0	0
332	Development	1	0	0	1	0	0	0	0	0	1	0	0	0	1	0	1	0	0	0	0	0	0	0	0	0	0
333	Development	0	0	0	0	0	0	0	0	0	0	0	0	0	0	0	0	0	0	0	0	0	0	0	0	0	0
334	Development	0	0	0	0	0	0	0	0	0	0	0	0	0	0	0	0	0	0	0	0	0	0	0	0	0	0
335	Development	0	0	0	0	0	0	0	0	0	0	0	0	0	0	0	0	0	0	0	0	0	0	0	0	0	0
336	Development	1	0	0	1	0	0	0	0	0	0	0	0	0	1	0	0	0	1	0	0	0	1	0	0	1	1
337	Development	0	0	0	0	0	0	0	0	0	0	0	0	0	0	0	0	0	0	0	0	0	0	0	0	0	0
338	Development	0	0	0	0	0	0	0	0	0	0	0	0	0	0	0	0	0	0	0	0	0	0	0	0	0	0
339	Development	0	0	0	0	0	0	0	0	0	0	0	0	0	0	0	0	0	0	0	0	0	0	0	0	0	0
340	Development	1	0	0	0	1	1	0	0	0	0	0	0	0	1	1	1	1	1	0	0	0	1	0	0	1	0
341	Development	1	0	0	0	0	0	0	0	0	0	1	0	0	0	0	0	0	0	0	0	0	0	0	0	0	0
342	Development	1	0	1	0	0	0	0	0	0	0	0	1	0	1	1	1	0	0	0	0	0	0	0	0	0	0
343	Development	0	0	0	0	0	0	0	0	0	0	0	0	0	1	1	1	0	0	0	0	0	0	0	0	0	0
344	Development	0	0	0	0	0	0	0	0	0	0	0	0	0	0	0	0	0	0	0	0	0	0	0	0	0	0
